# Supplementary material
Source: PubMed Central journal article supplement (PMC3074535)

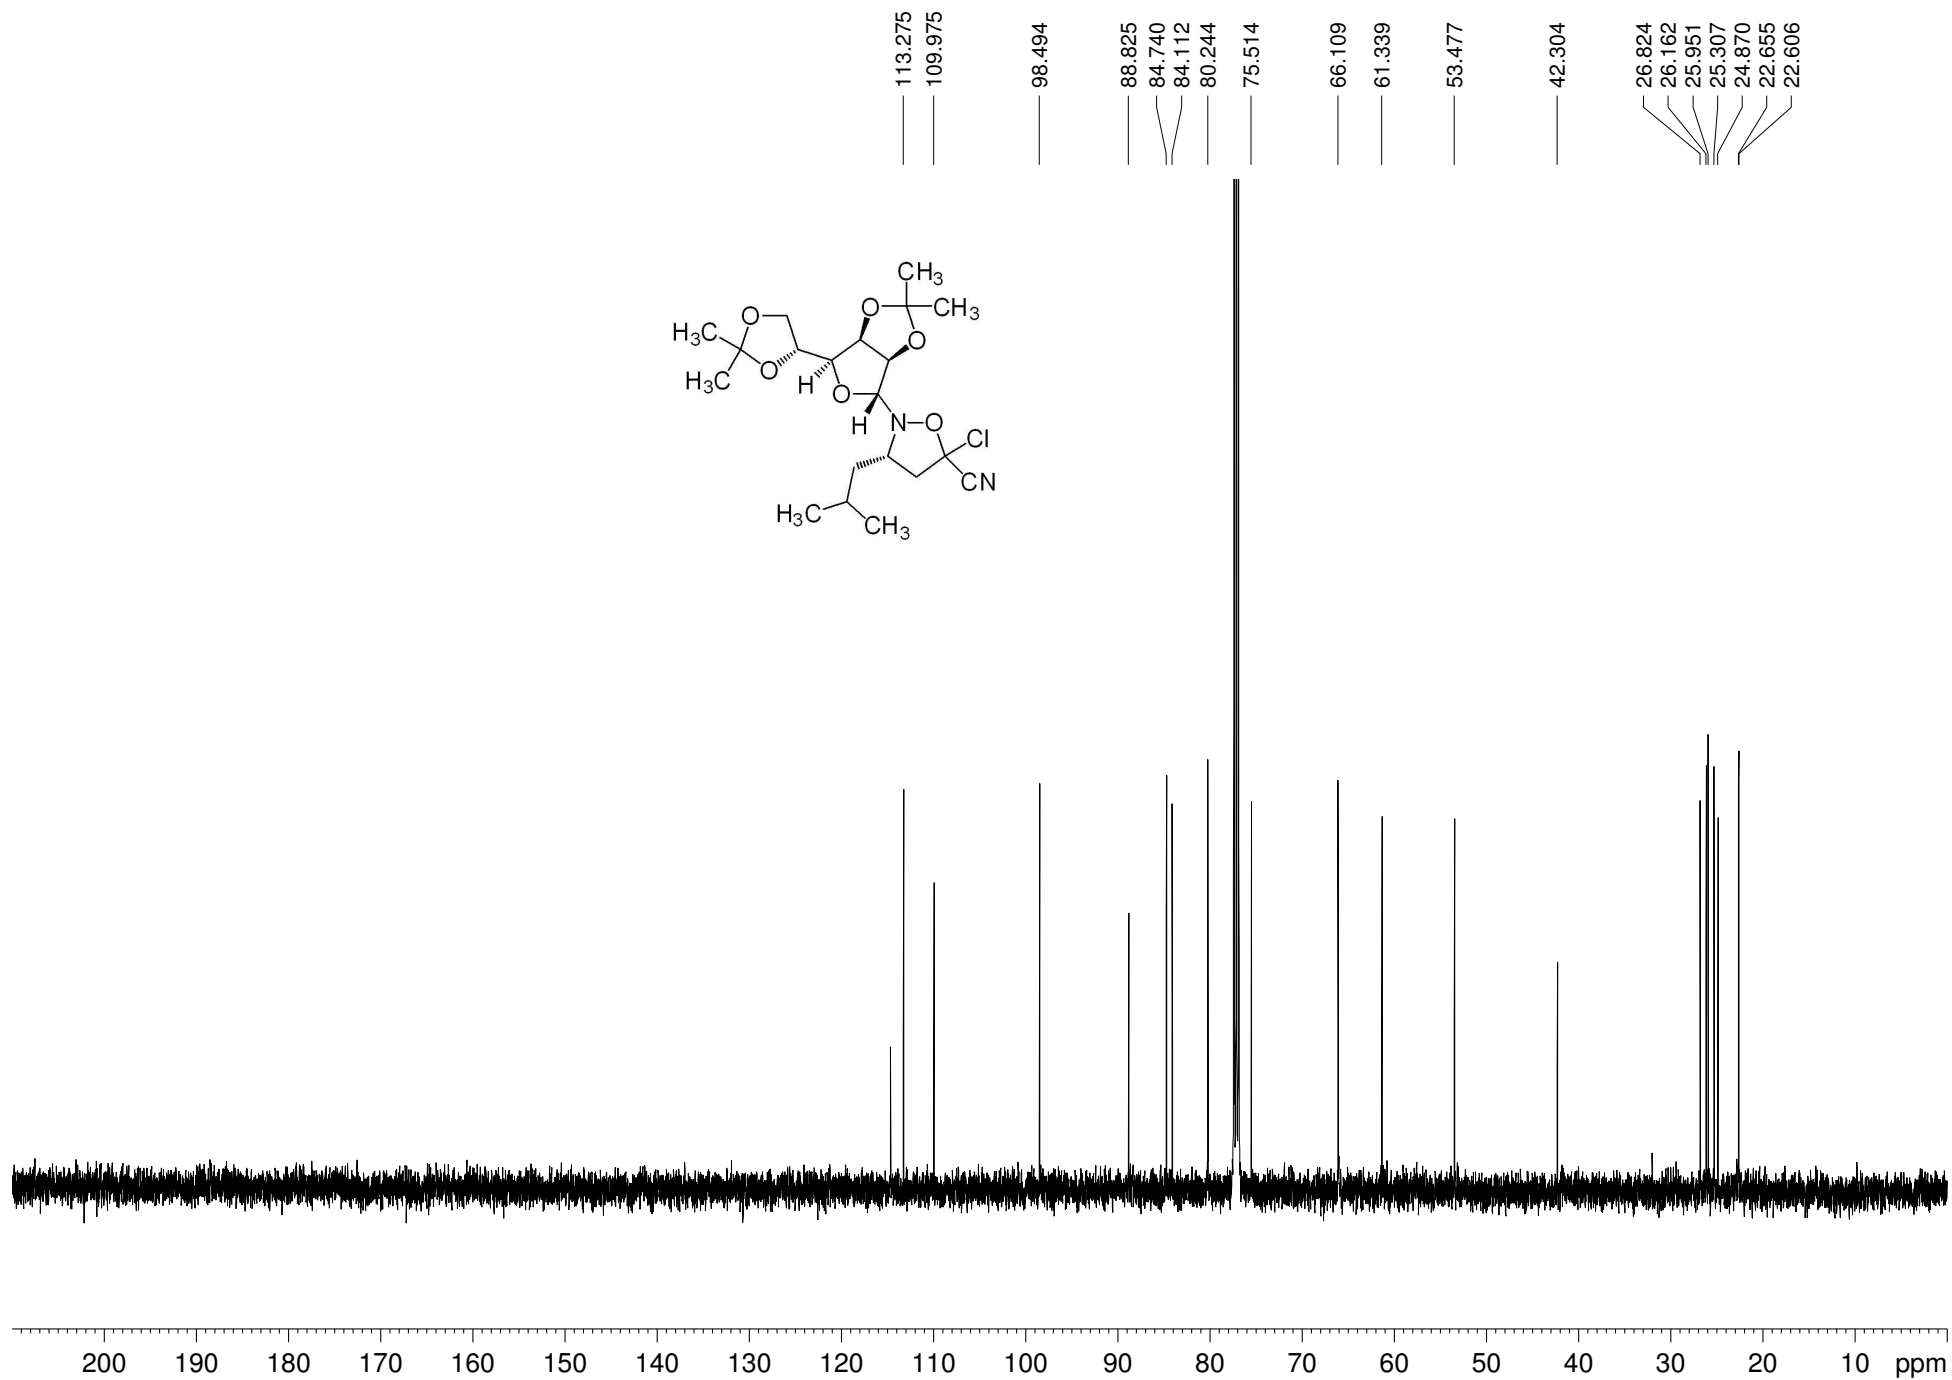

5.031  
4.947  
4.935  
4.709  
4.701  
4.697  
4.689  
4.393  
4.379  
4.362  
4.349  
4.222  
4.209  
4.205  
4.192  
4.054  
4.046  
4.037  
4.029  
3.994  
3.980  
3.966  
3.745  
3.731  
3.728  
3.714  
3.253  
3.240  
3.226  
3.213  
2.956  
2.943  
2.929  
2.915  
1.758  
1.744  
1.731  
1.716  
1.643  
1.629  
1.616  
1.456  
1.418  
1.376  
1.345  
1.331  
1.317  
1.306  
1.290

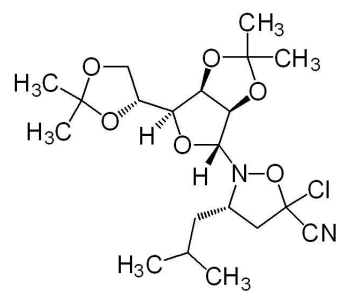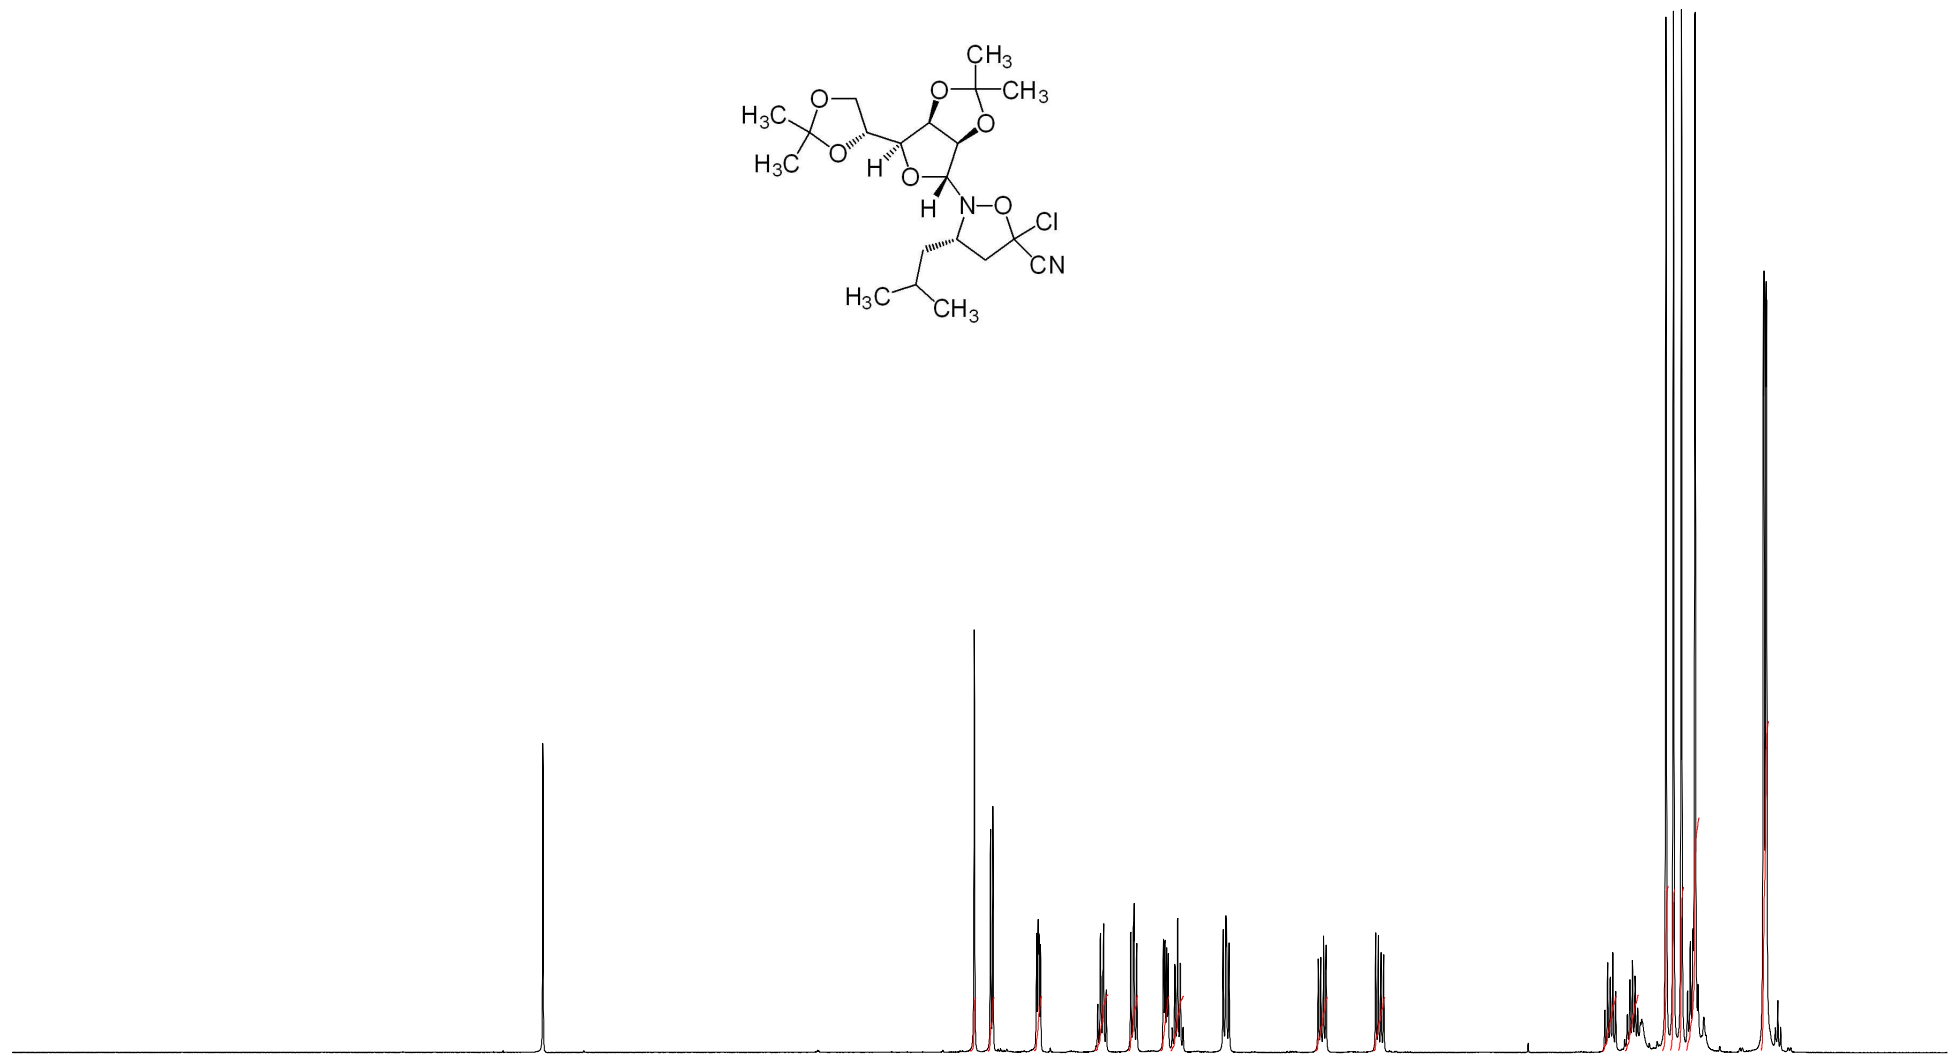

9.5 9.0 8.5 8.0 7.5 7.0 6.5 6.0 5.5 5.0 4.5 4.0 3.5 3.0 2.5 2.0 1.5 1.0 0.5 ppm

1.00  
1.00  
1.02  
1.05  
1.04  
1.03  
1.03  
1.00  
1.00

1.02  
1.05  
3.09  
3.04  
3.07  
4.38  
6.18

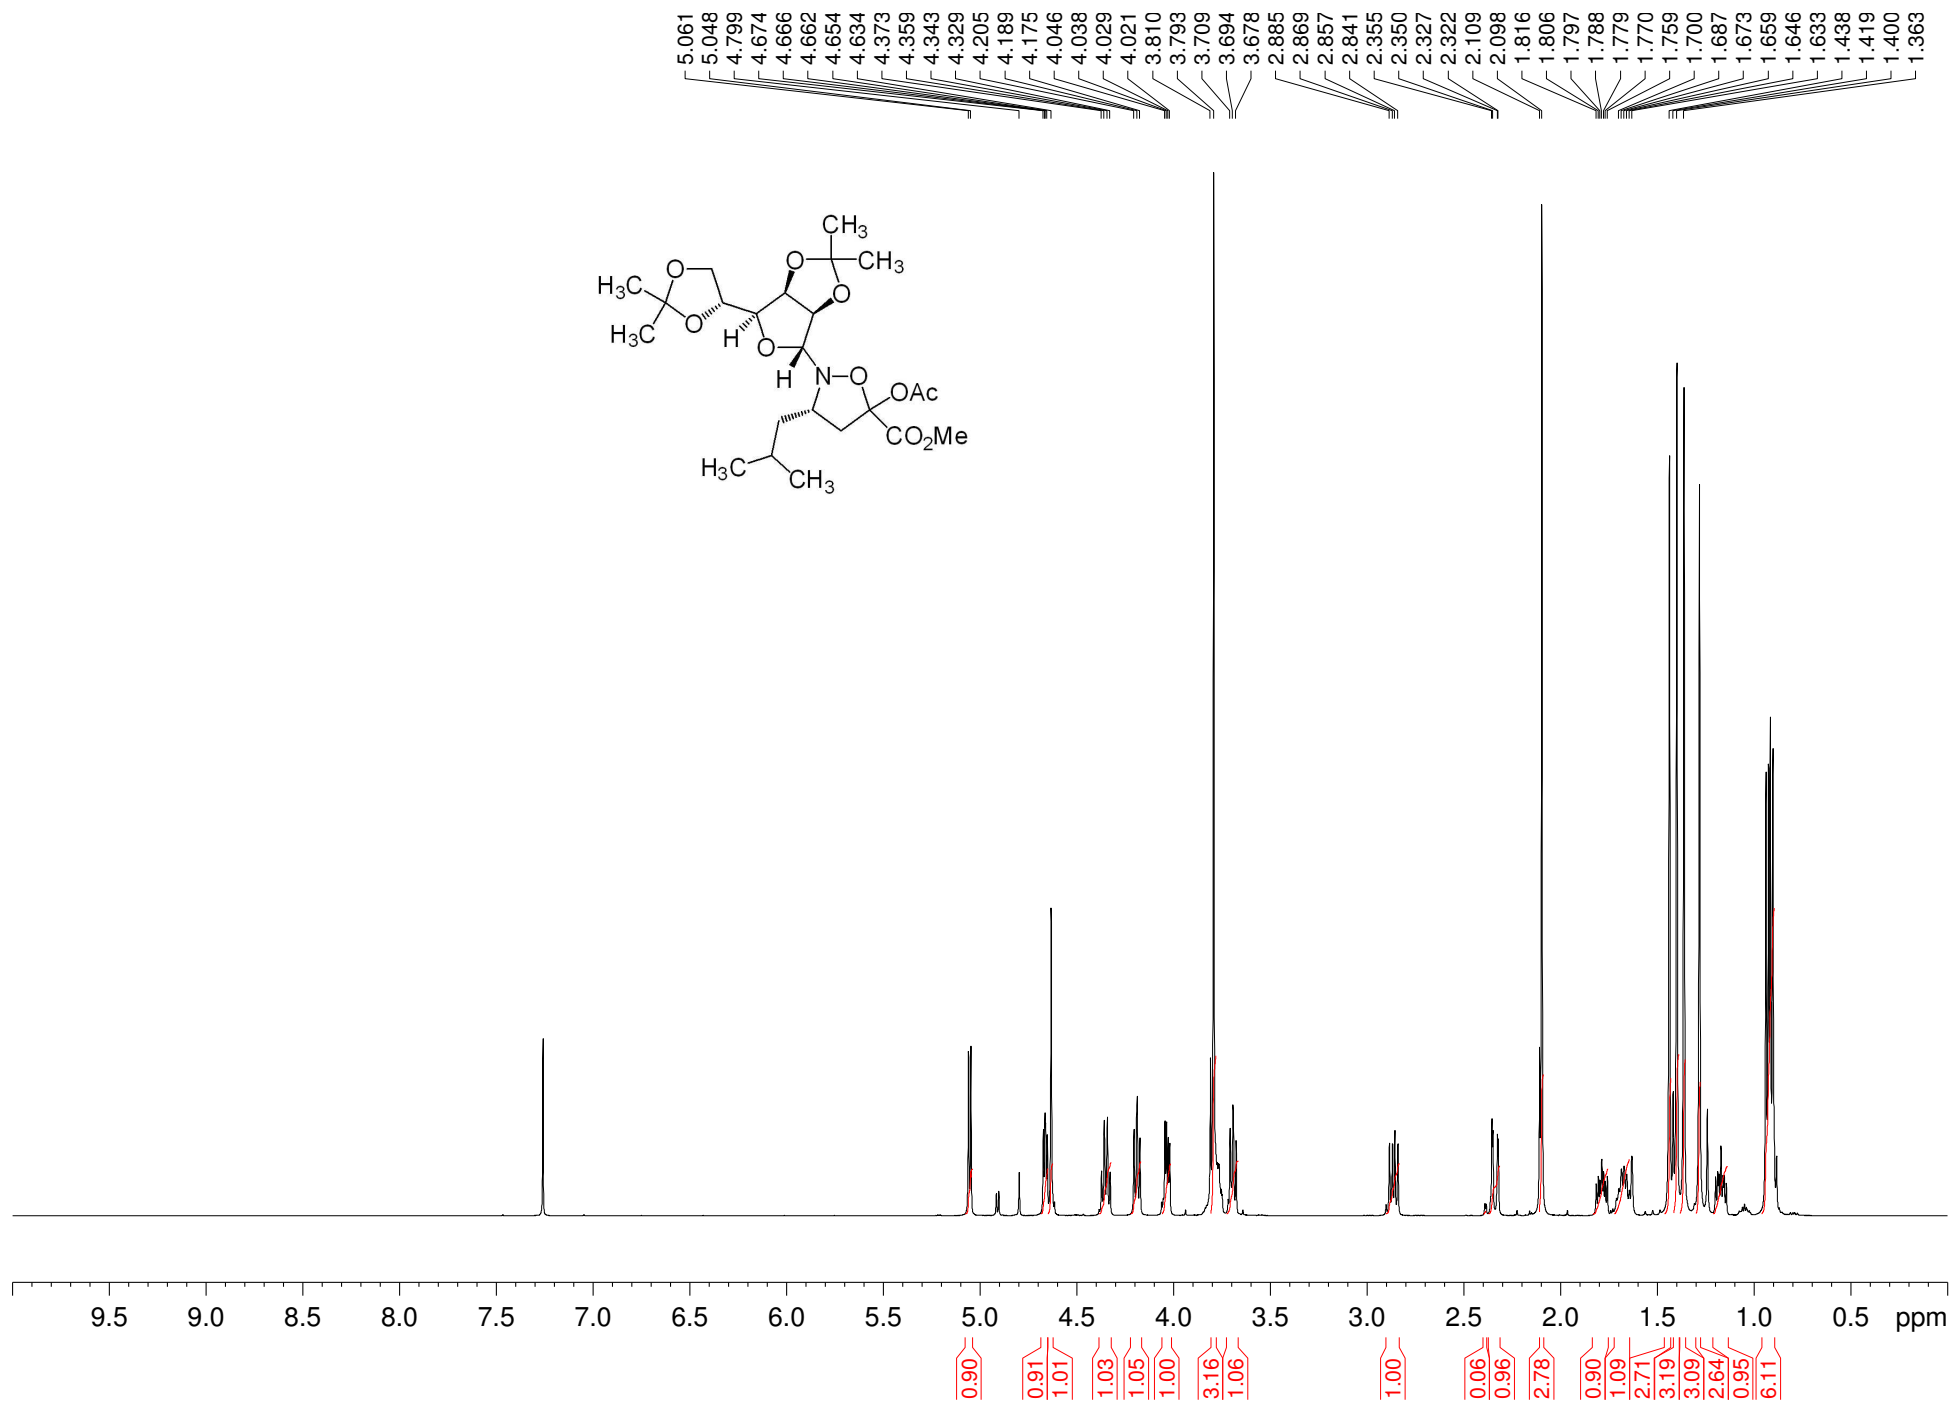

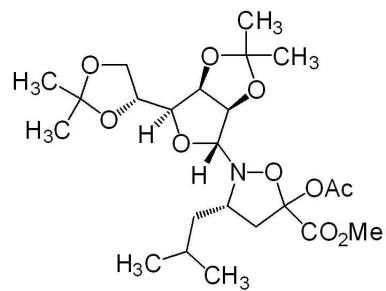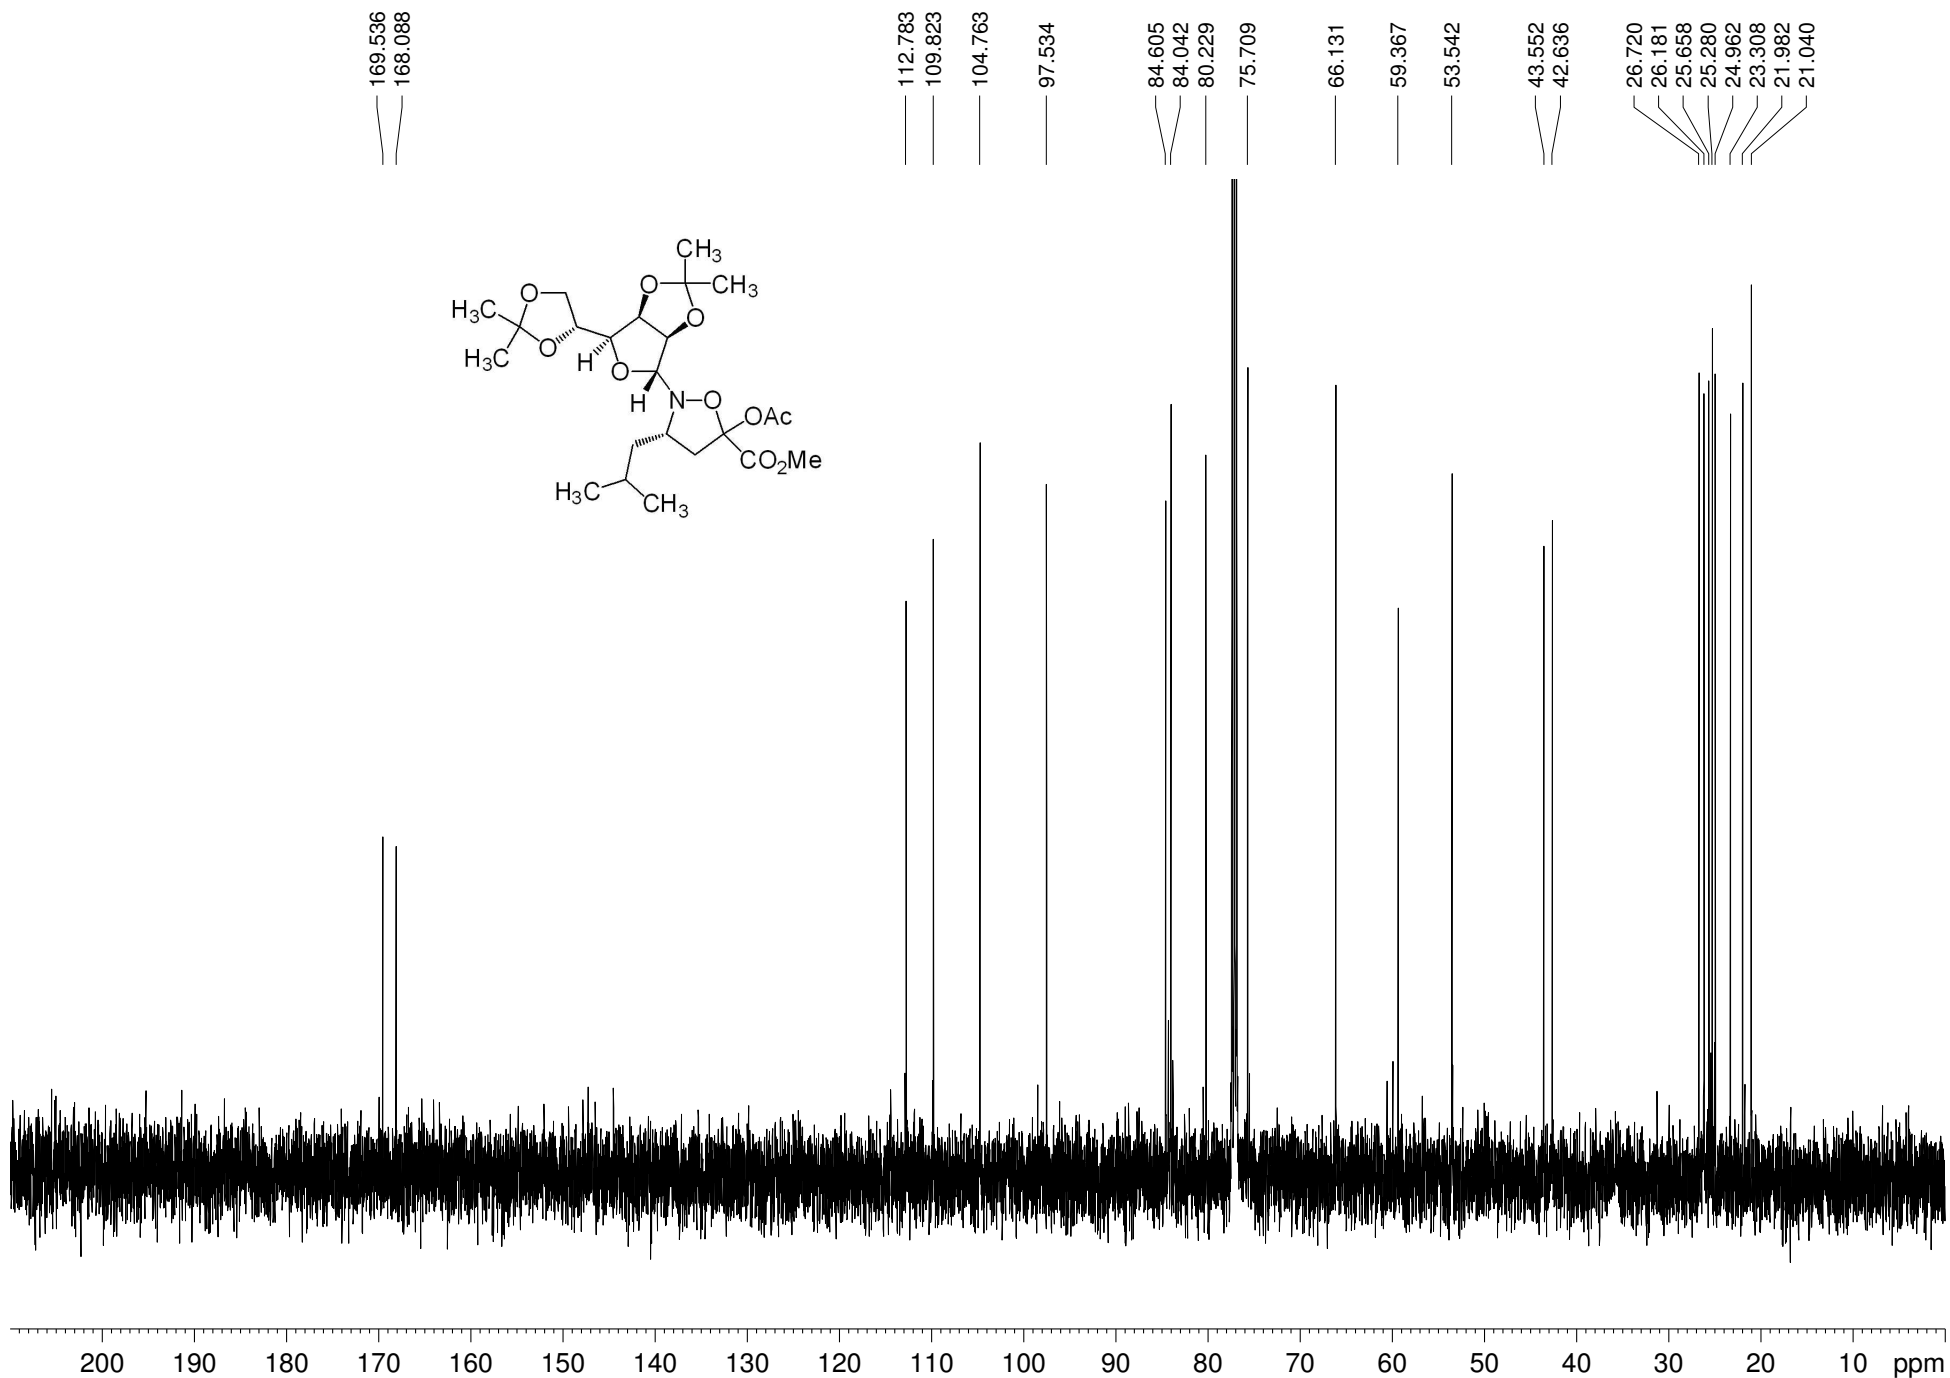

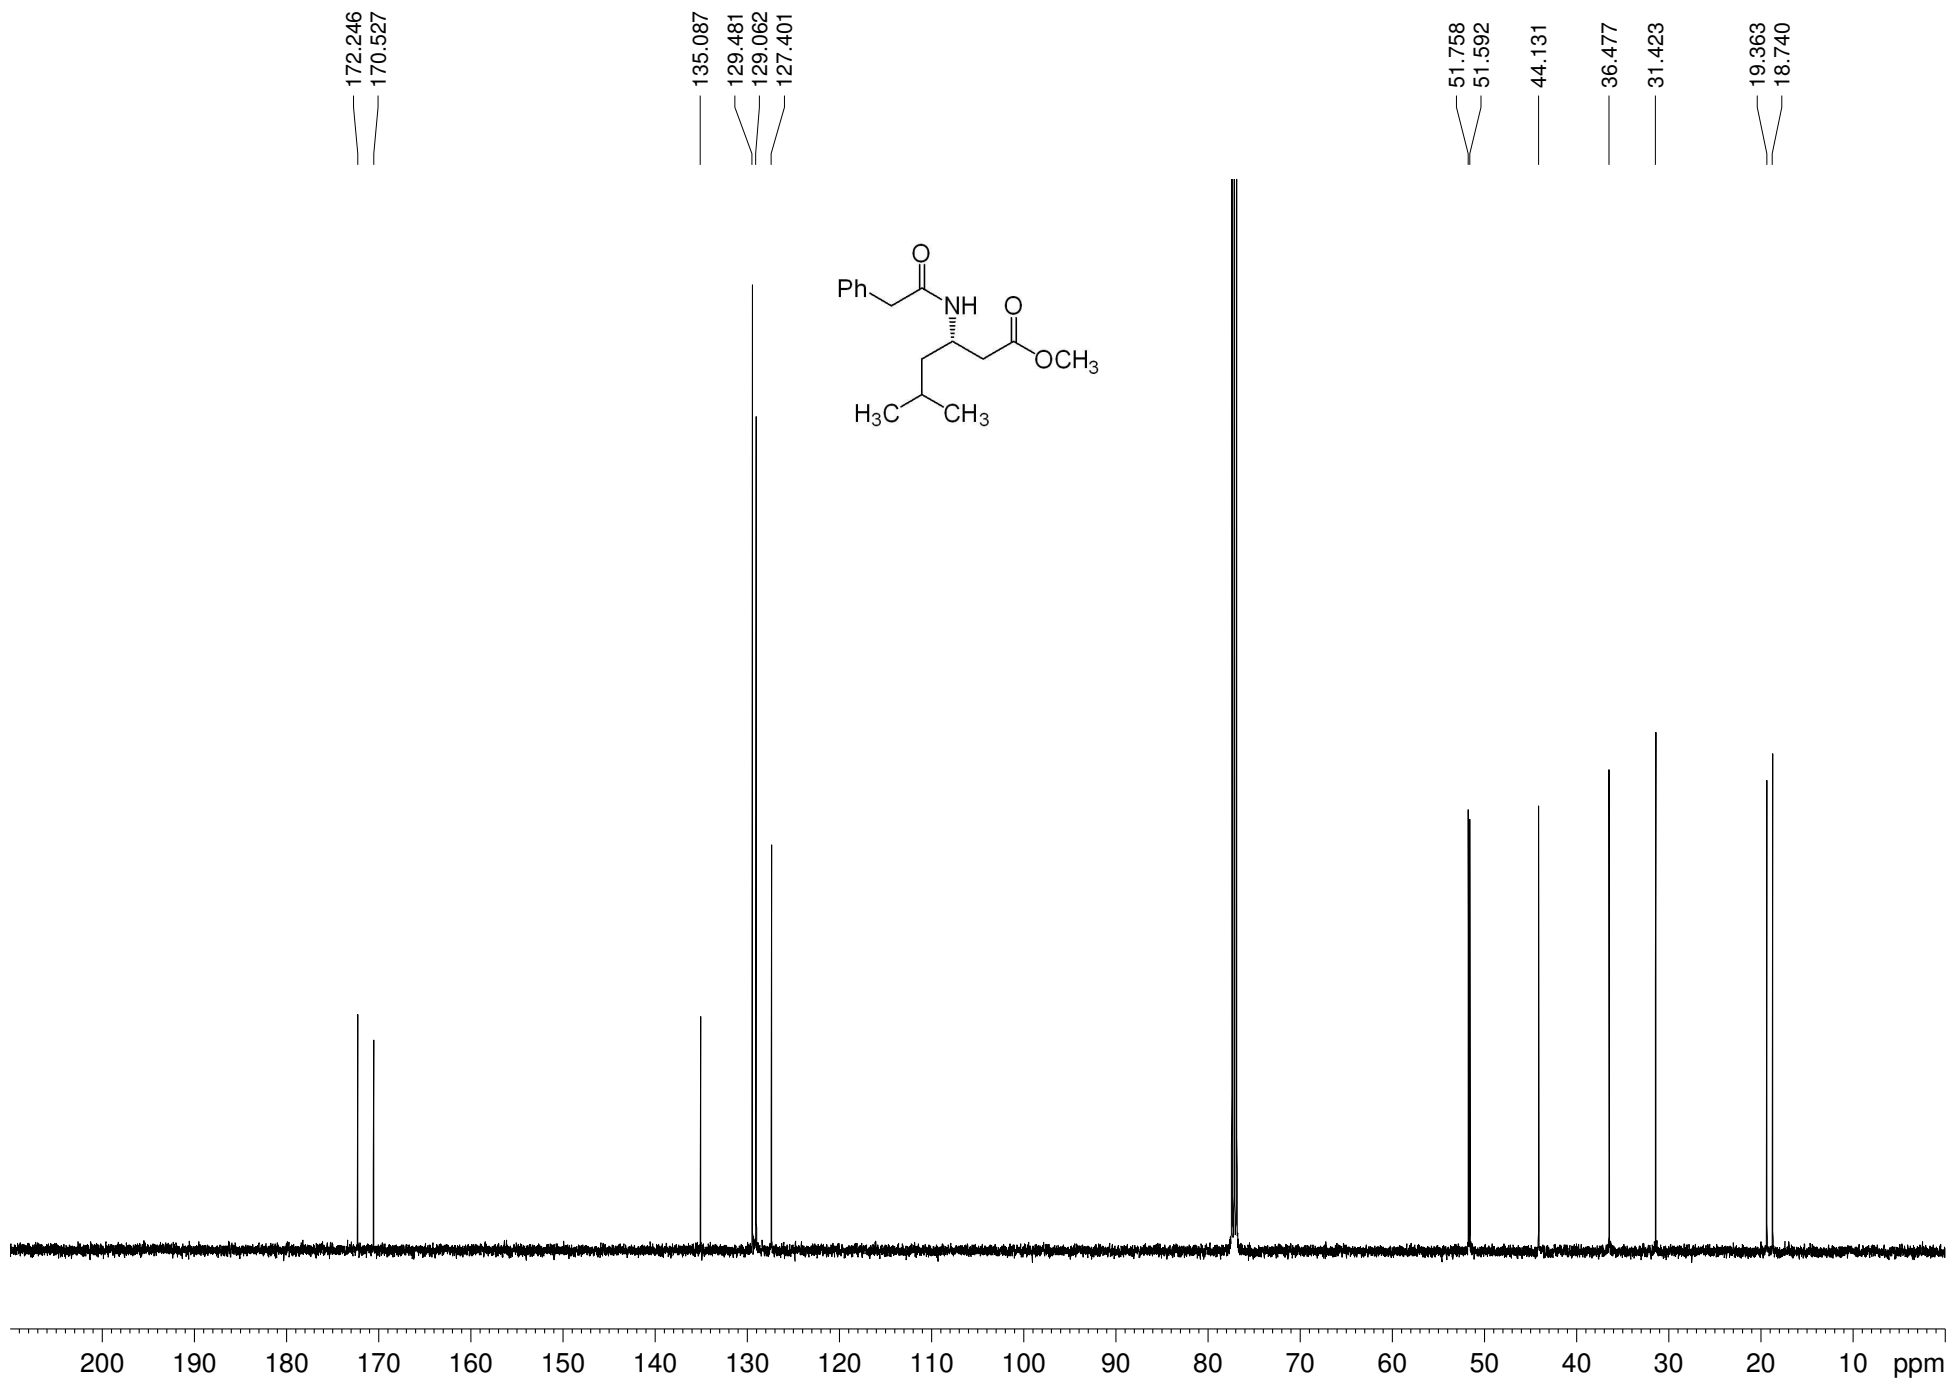

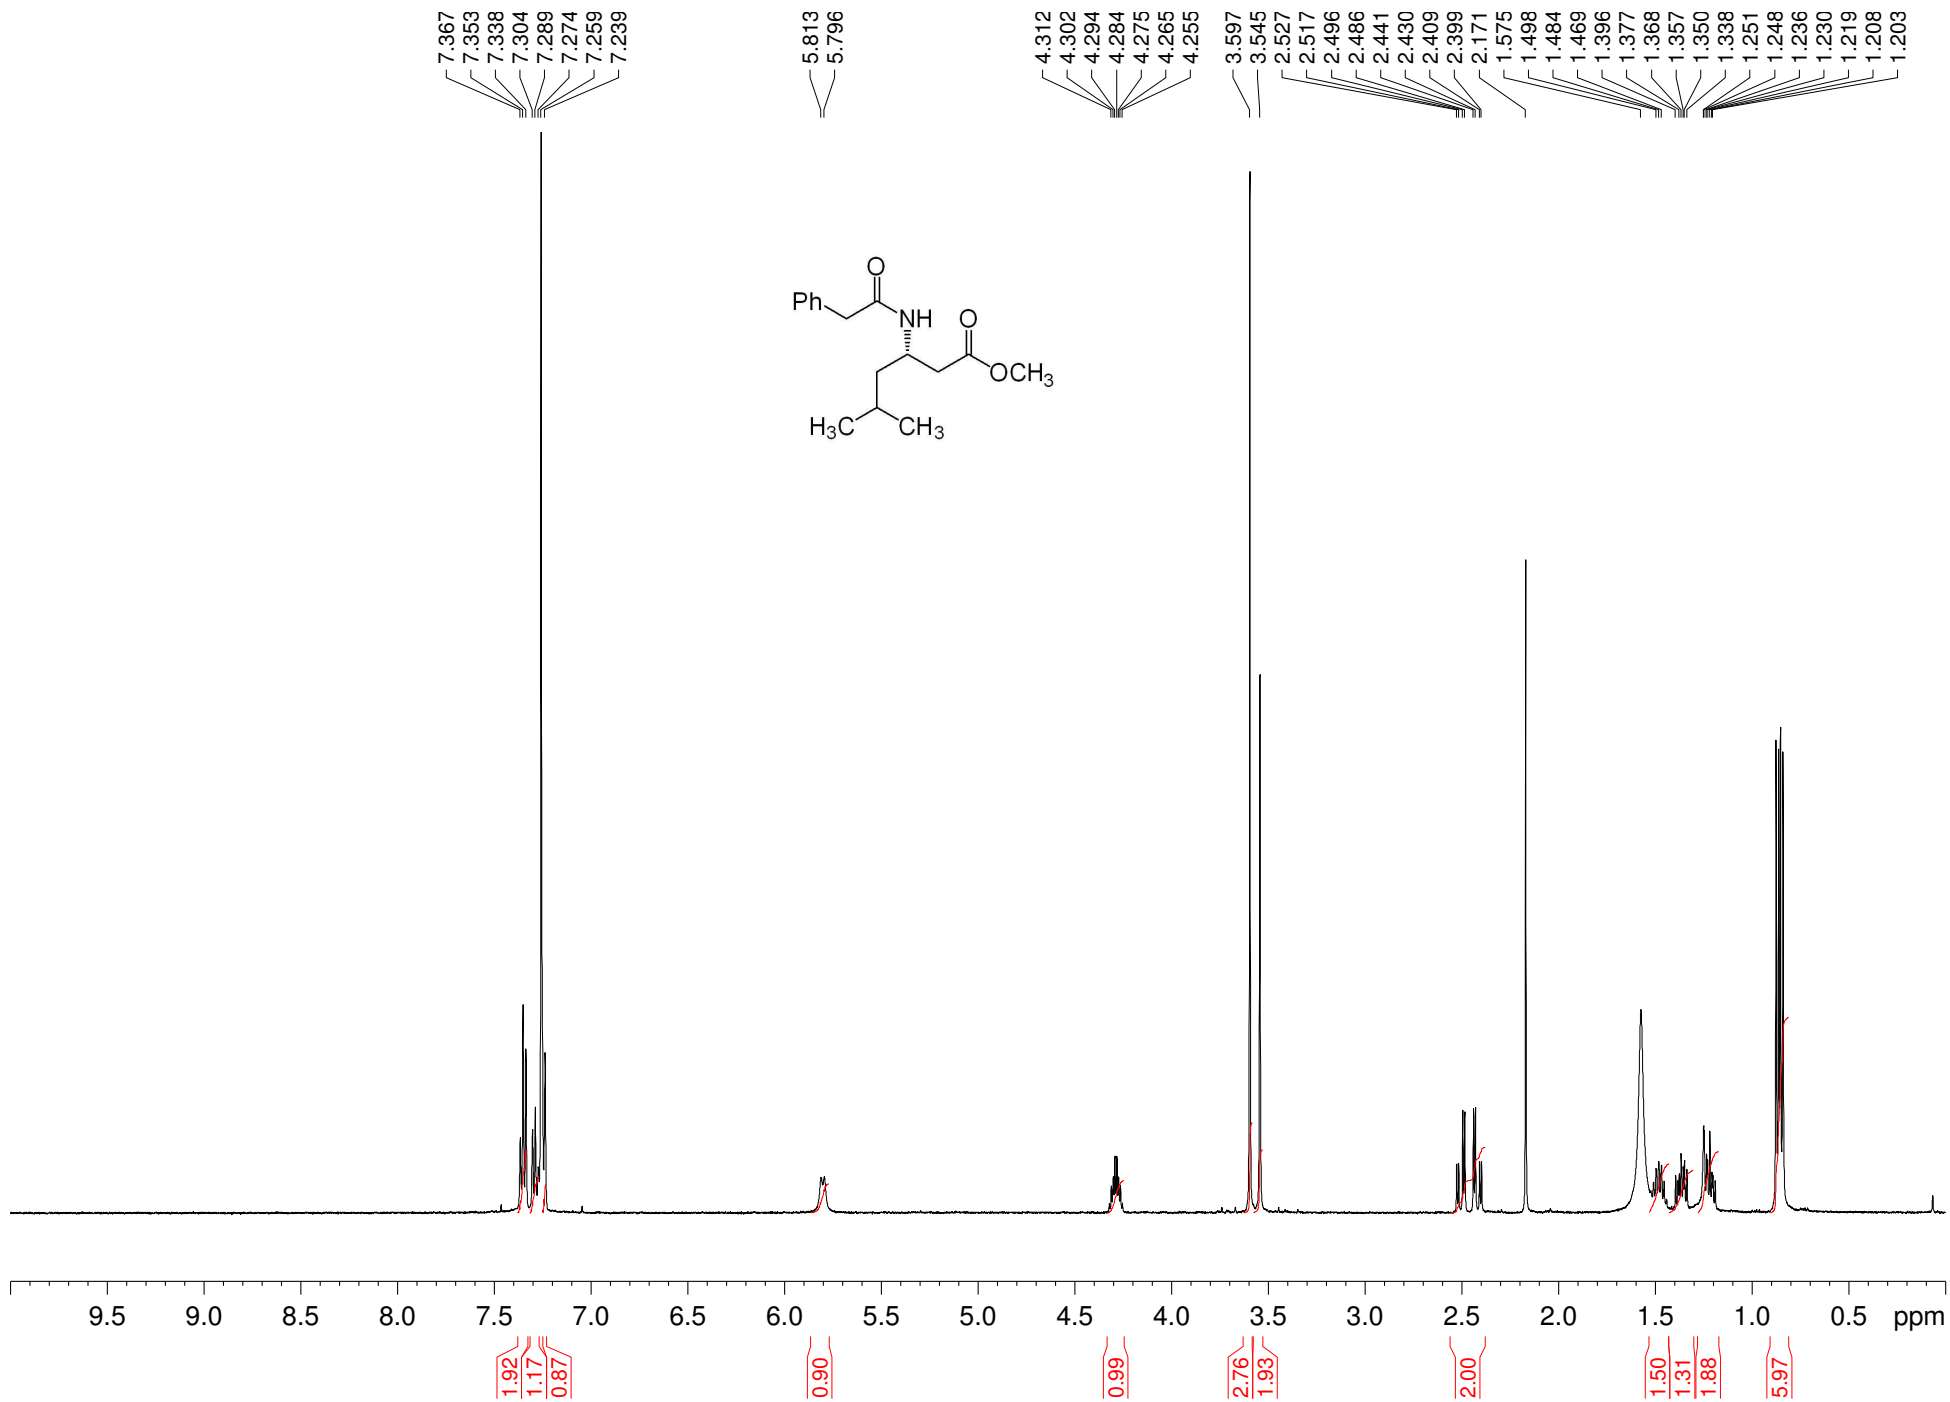

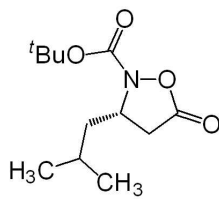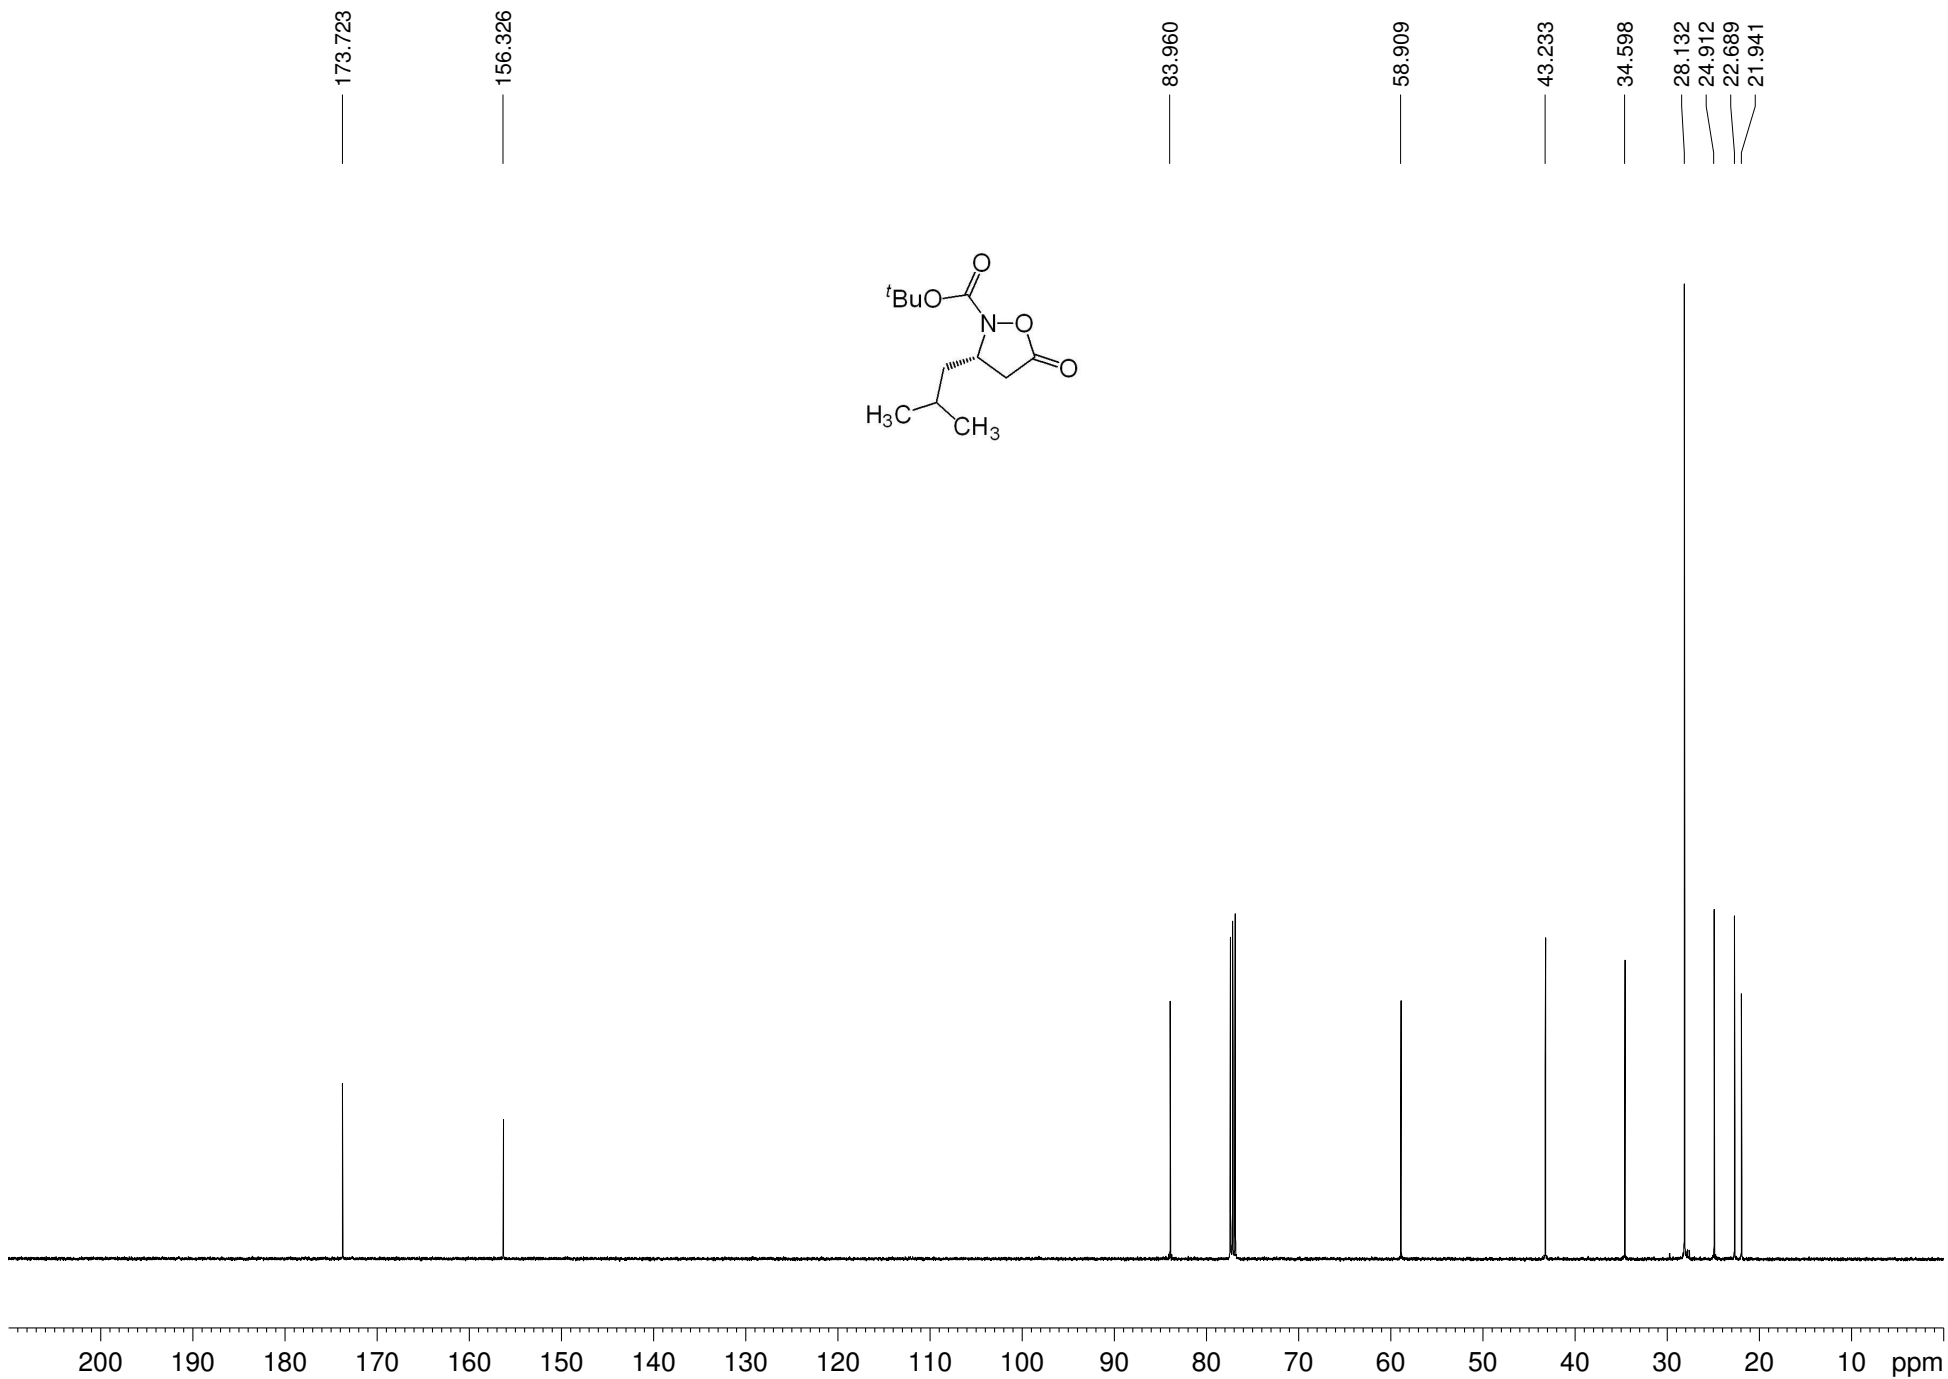

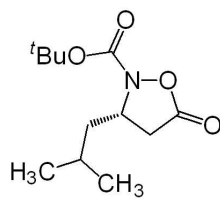

4.606  
4.602  
4.589  
4.585  
4.577  
4.573  
4.560

2.979  
2.962  
2.944  
2.926  
2.390  
2.387  
2.355  
2.351  
1.745  
1.738  
1.732  
1.721  
1.713  
1.702  
1.490  
1.278  
1.267  
1.255  
1.247  
0.959  
0.946  
0.927  
0.914

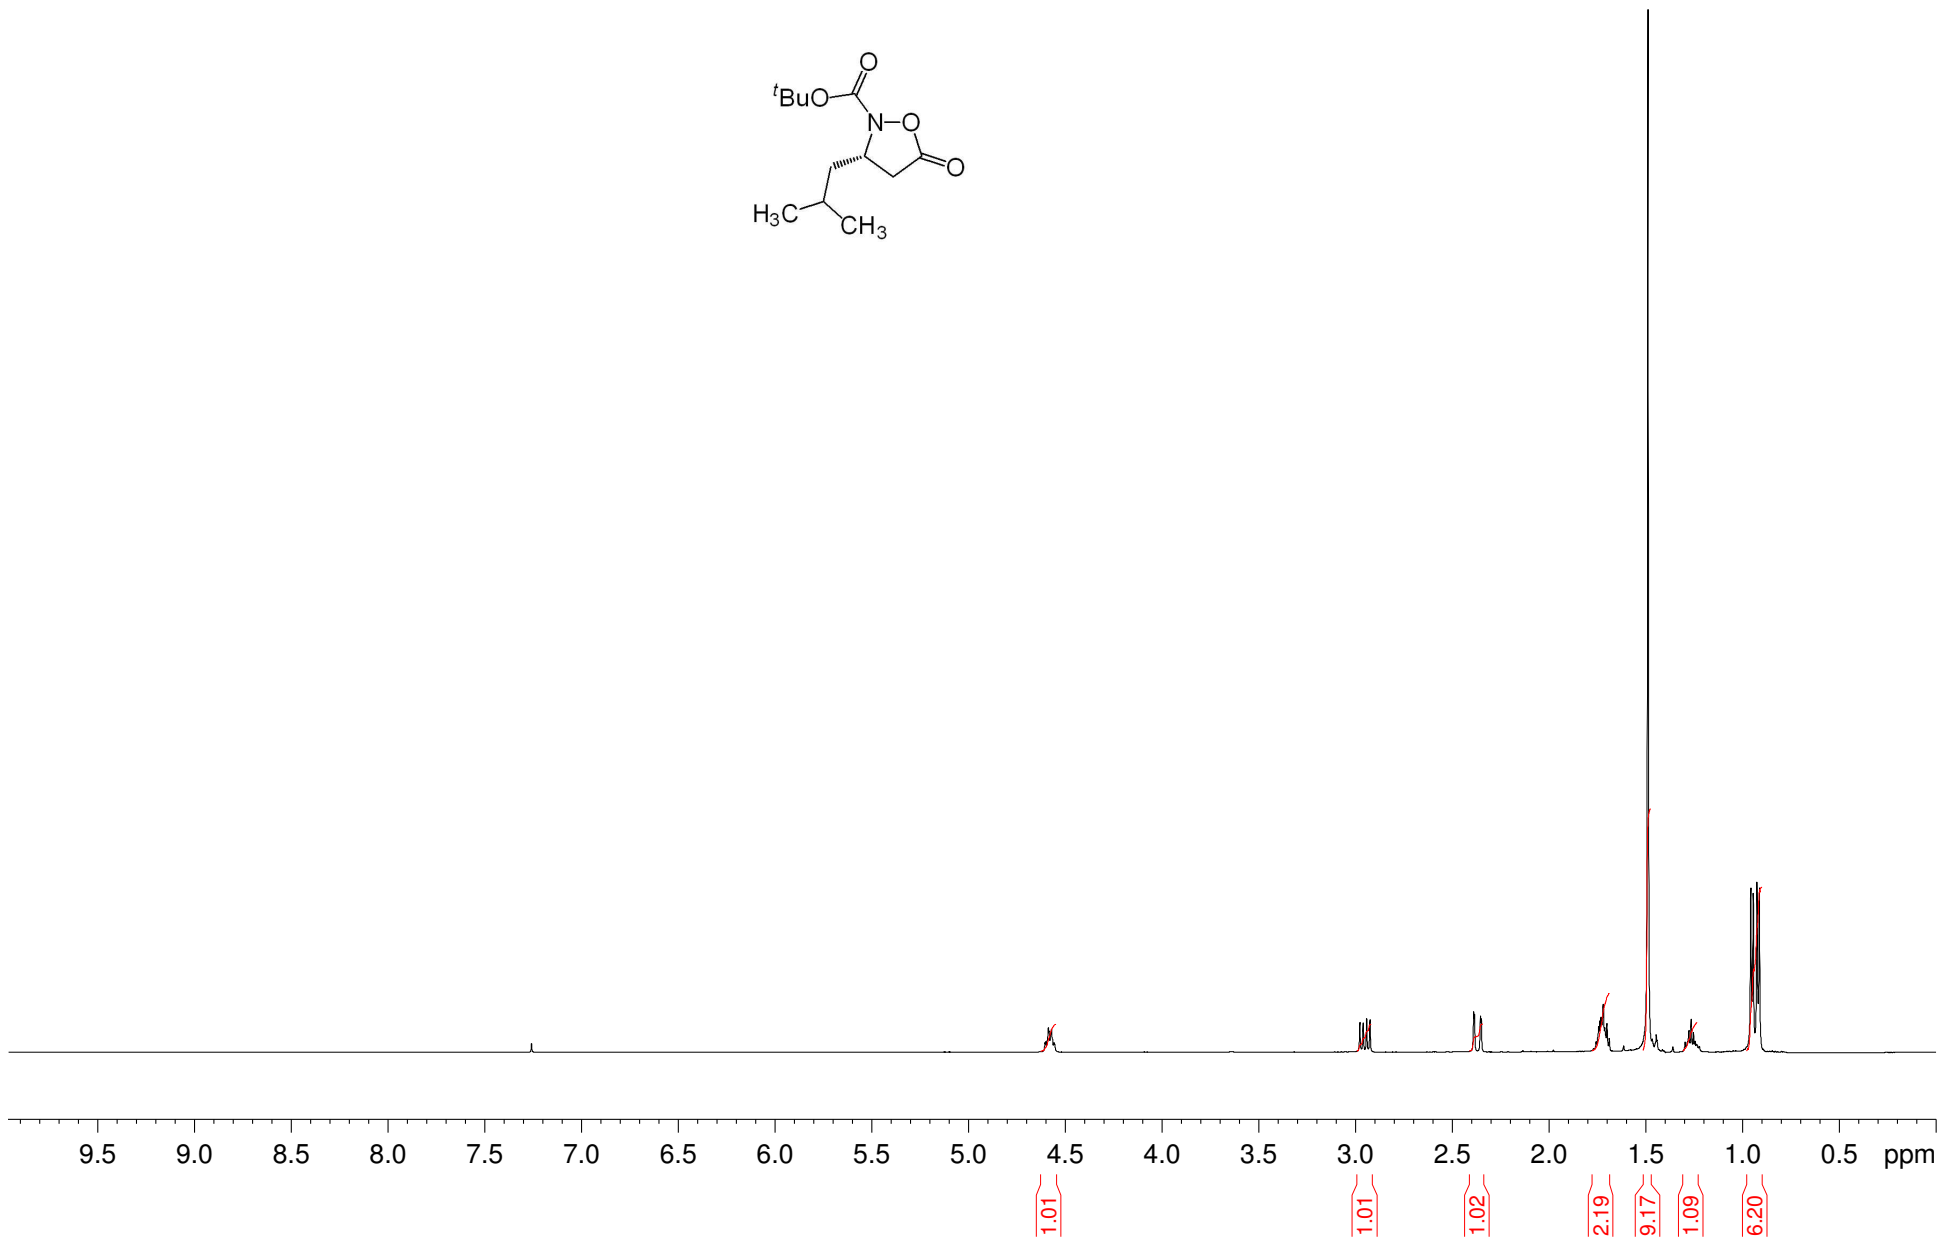



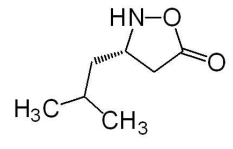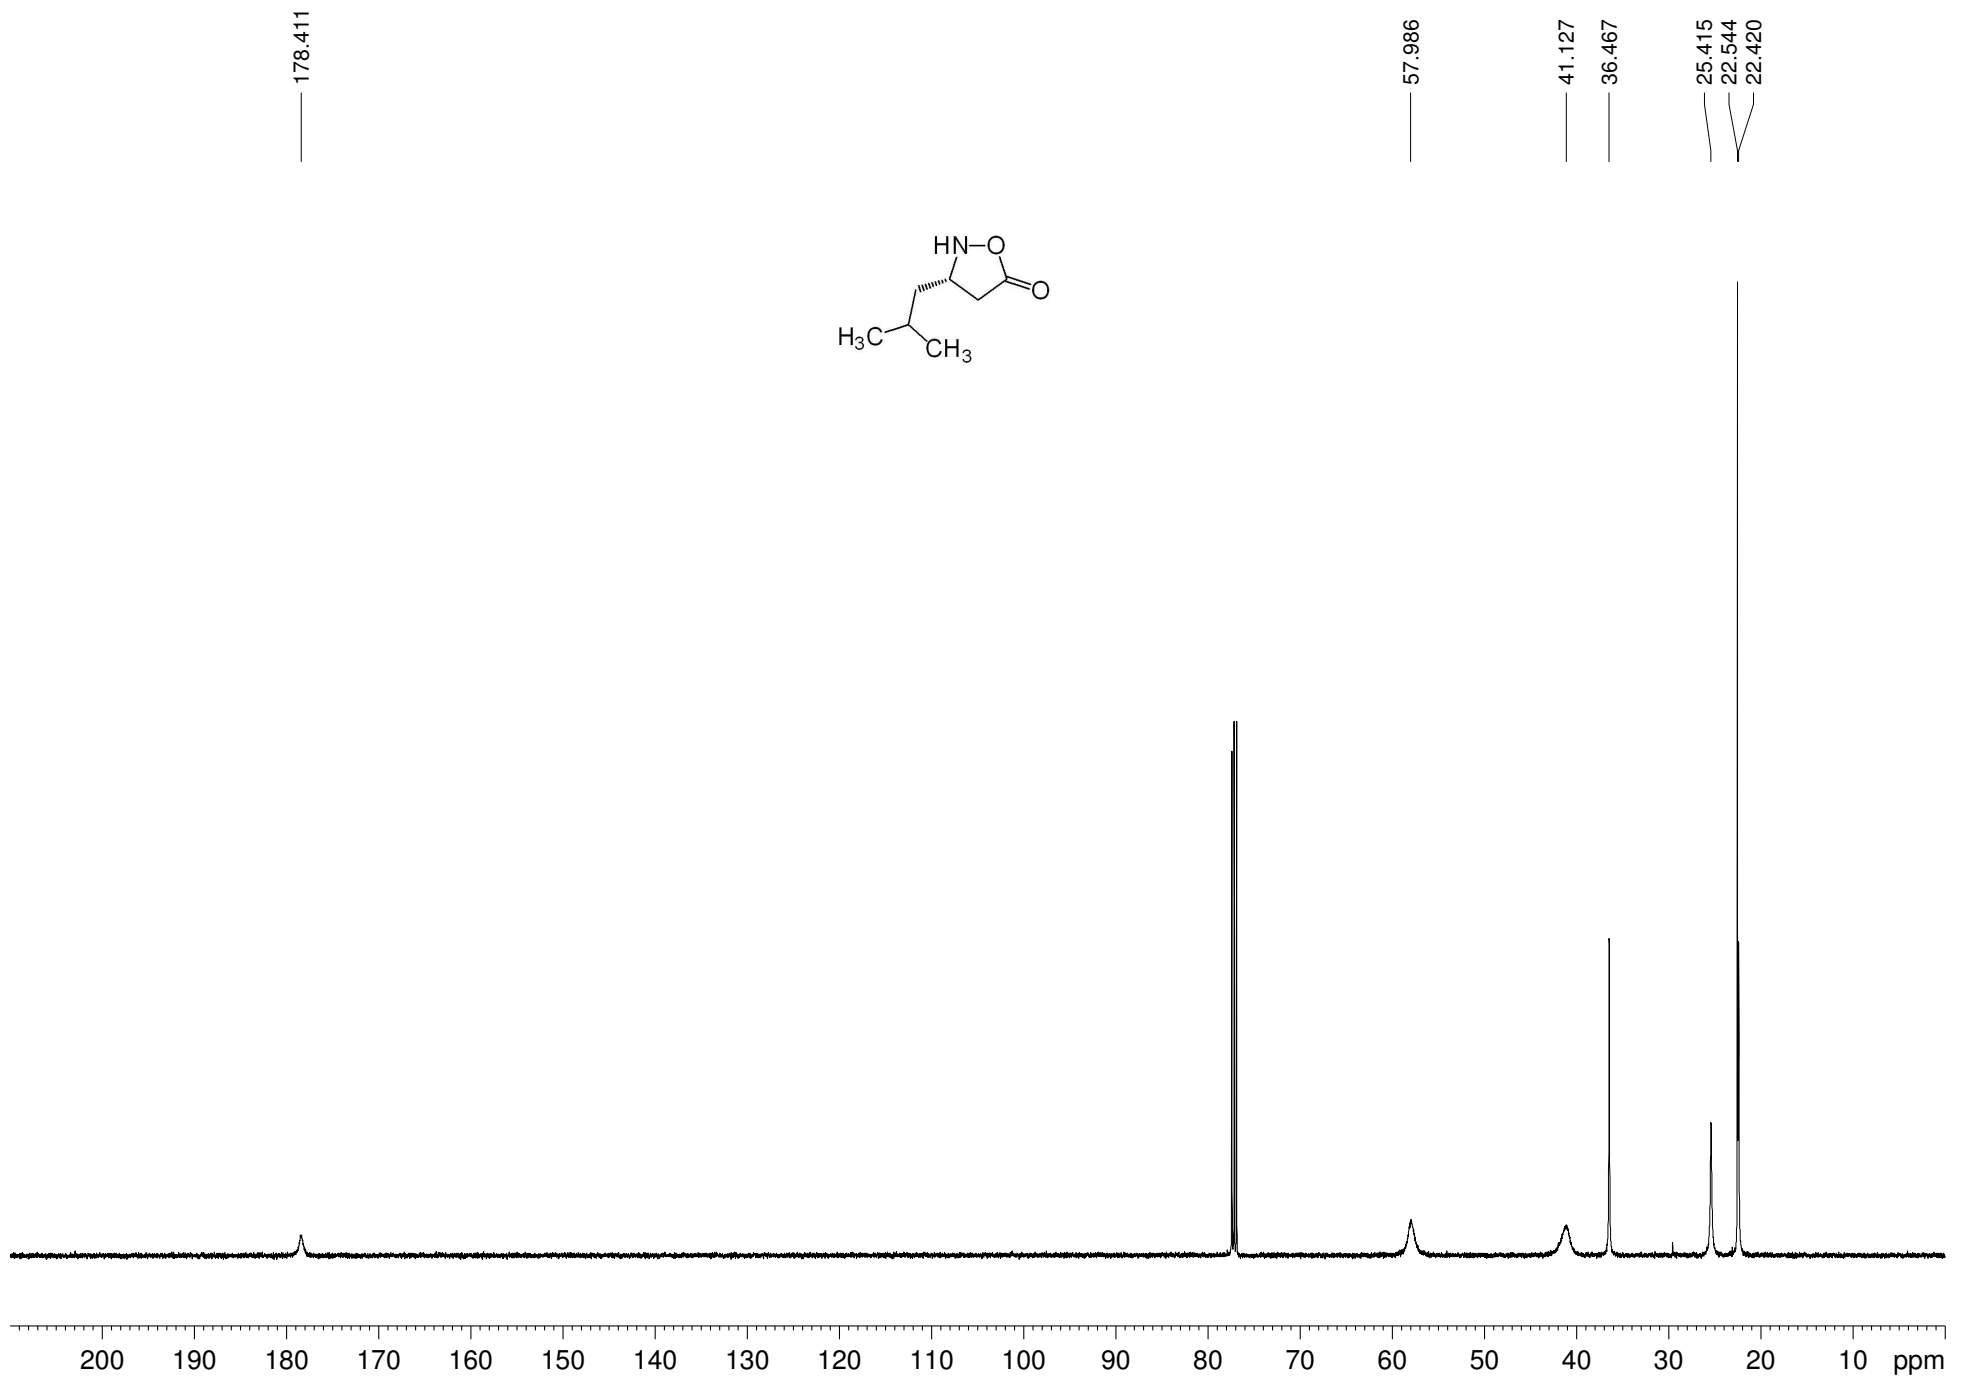

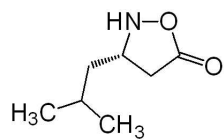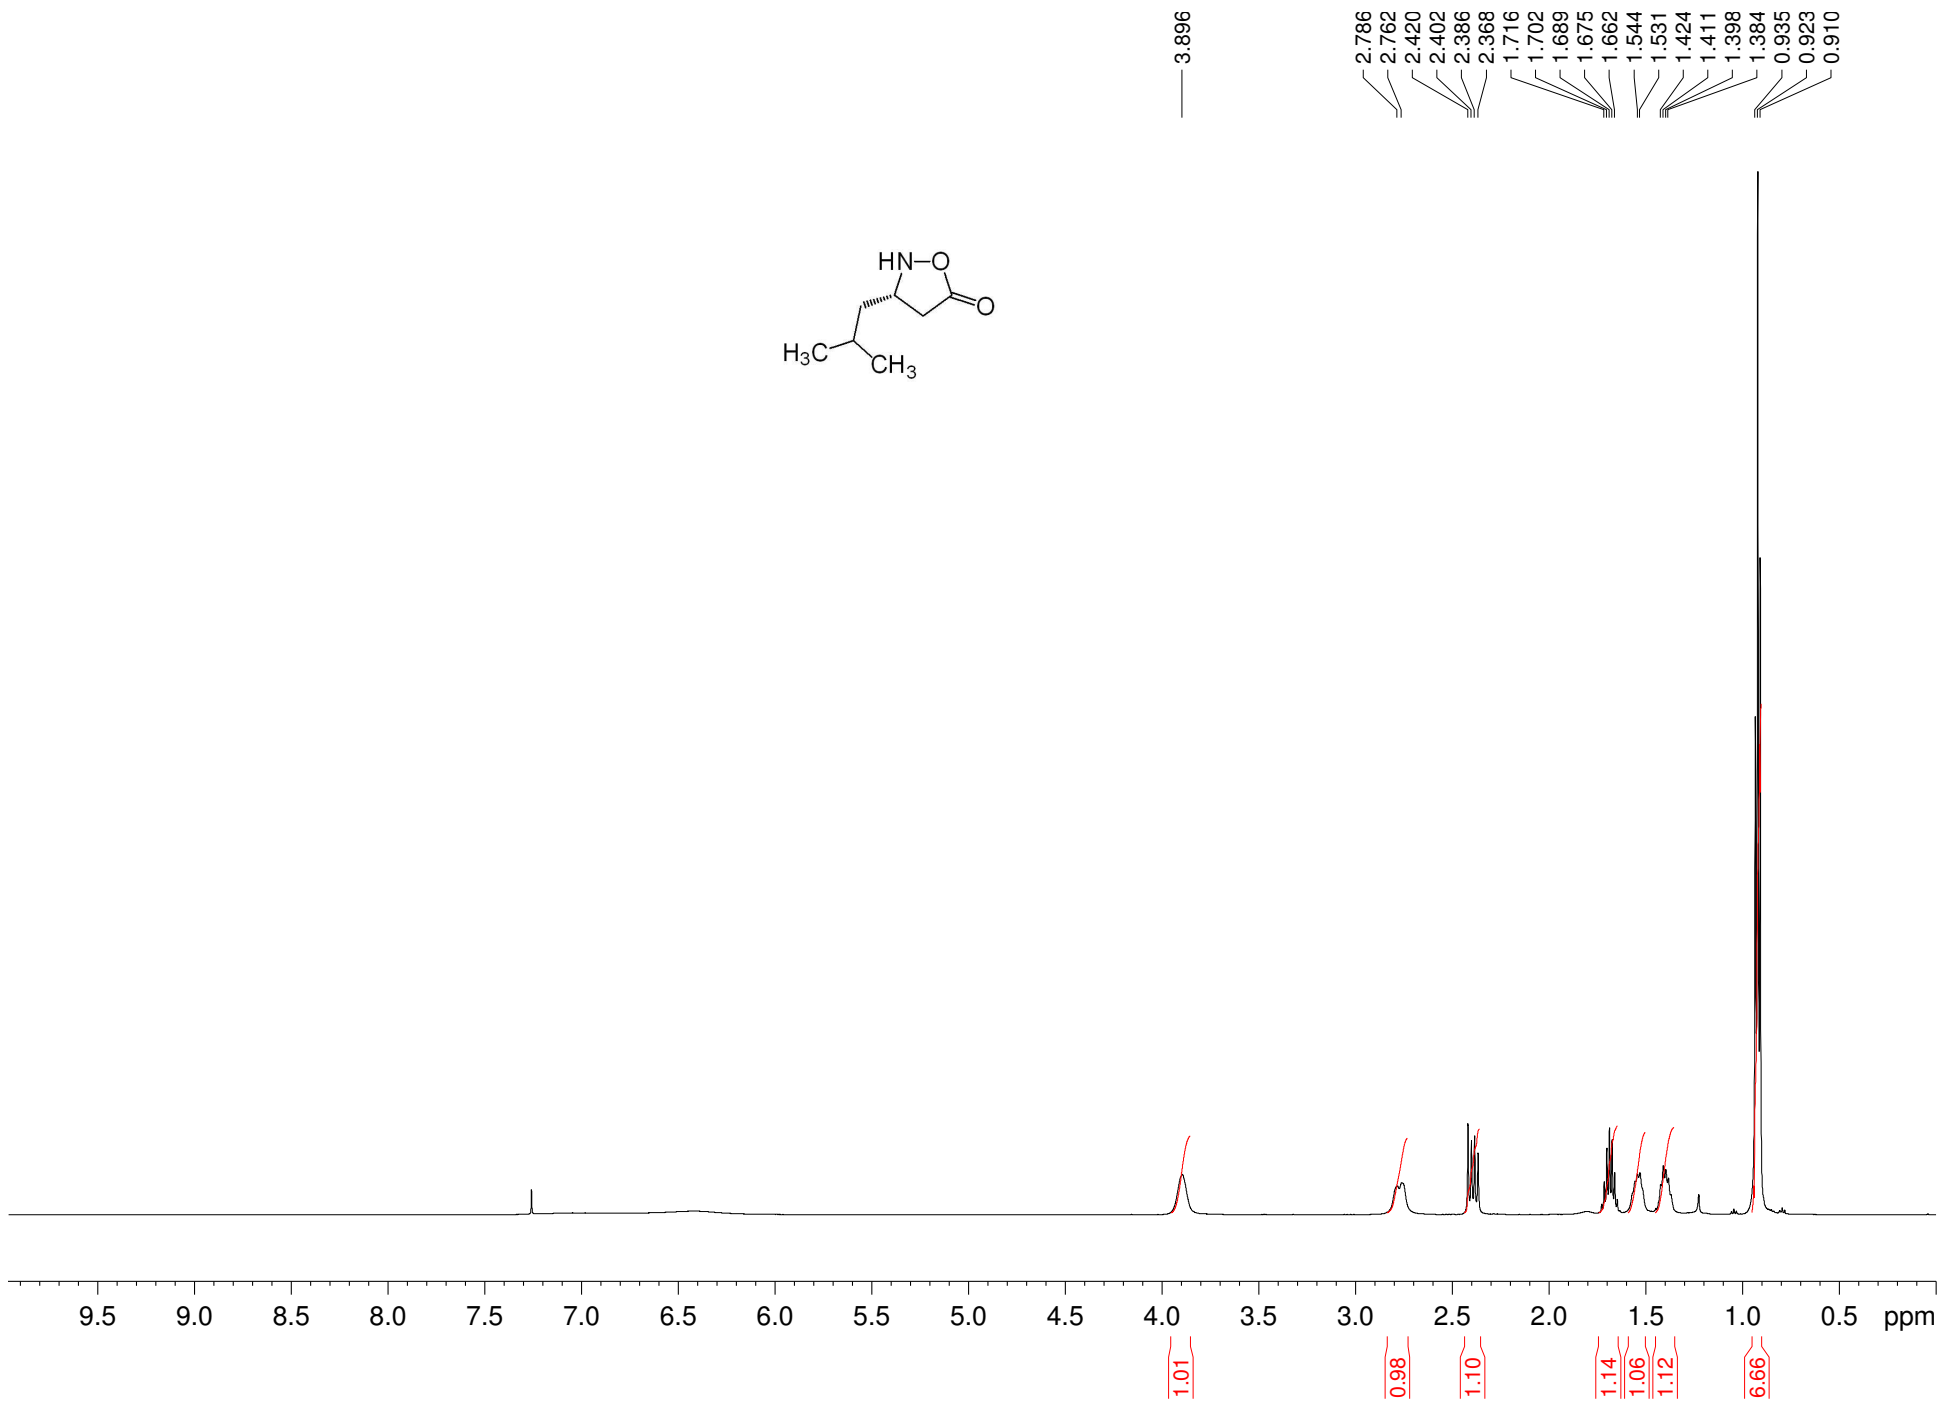

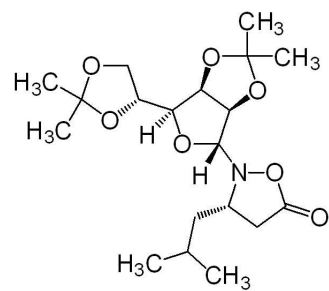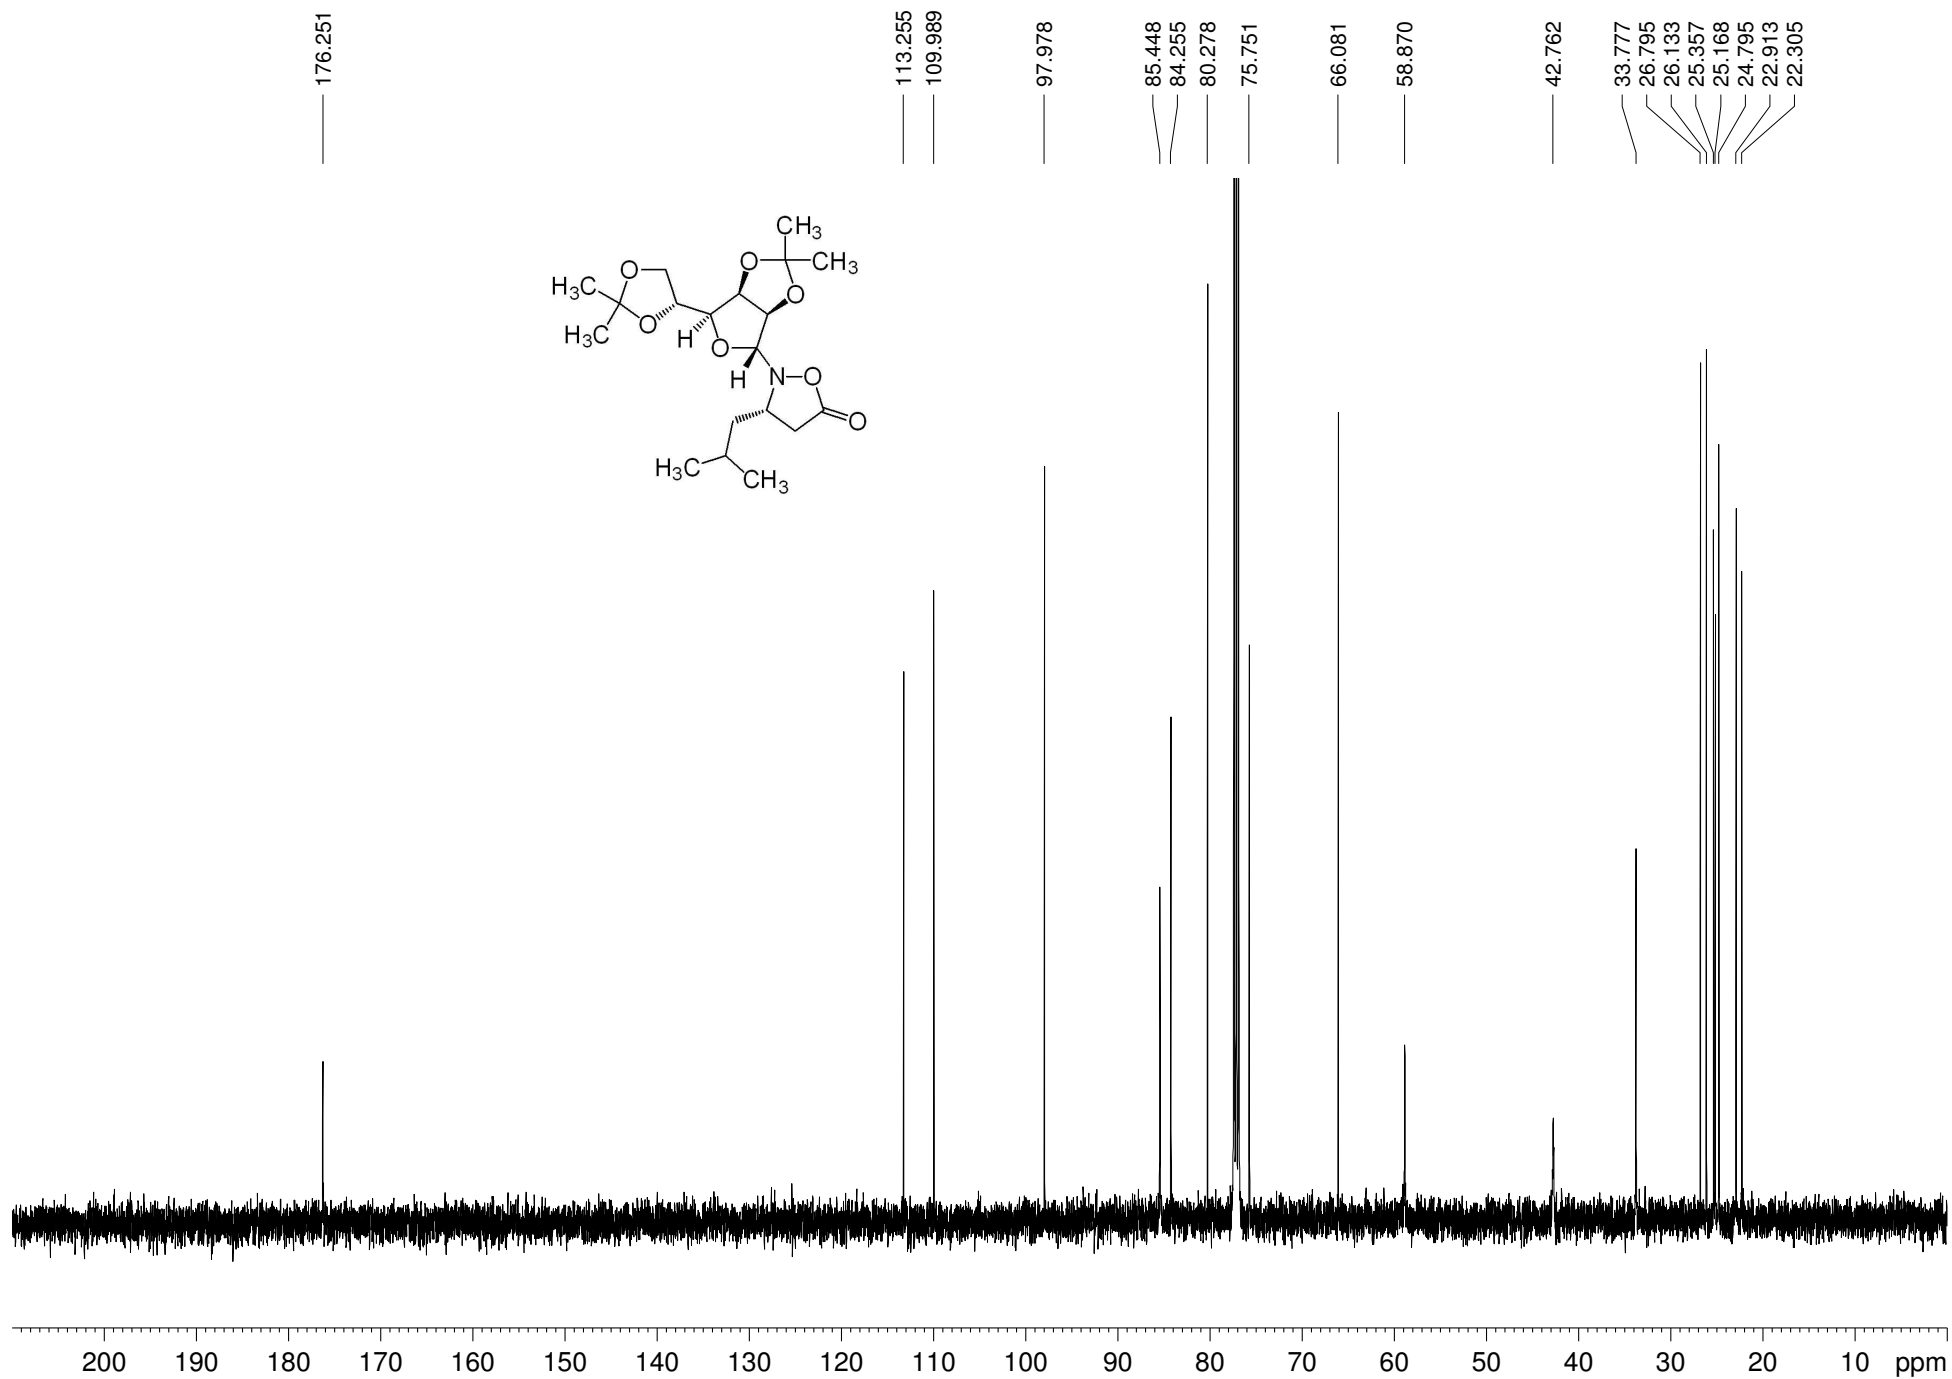

4.909  
4.897  
4.730  
4.721  
4.710  
4.378  
4.364  
4.348  
4.334  
4.214  
4.200  
4.197  
4.183  
4.087  
4.029  
4.020  
4.012  
3.955  
3.943  
3.931  
3.736  
3.722  
3.718  
3.705  
2.899  
2.883  
2.864  
2.848  
2.411  
2.401  
2.376  
2.366  
1.730  
1.719  
1.715  
1.702  
1.695  
1.690  
1.684  
1.672  
1.454  
1.412  
1.375  
1.290  
0.955  
0.943  
0.931

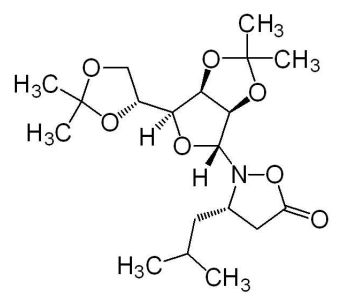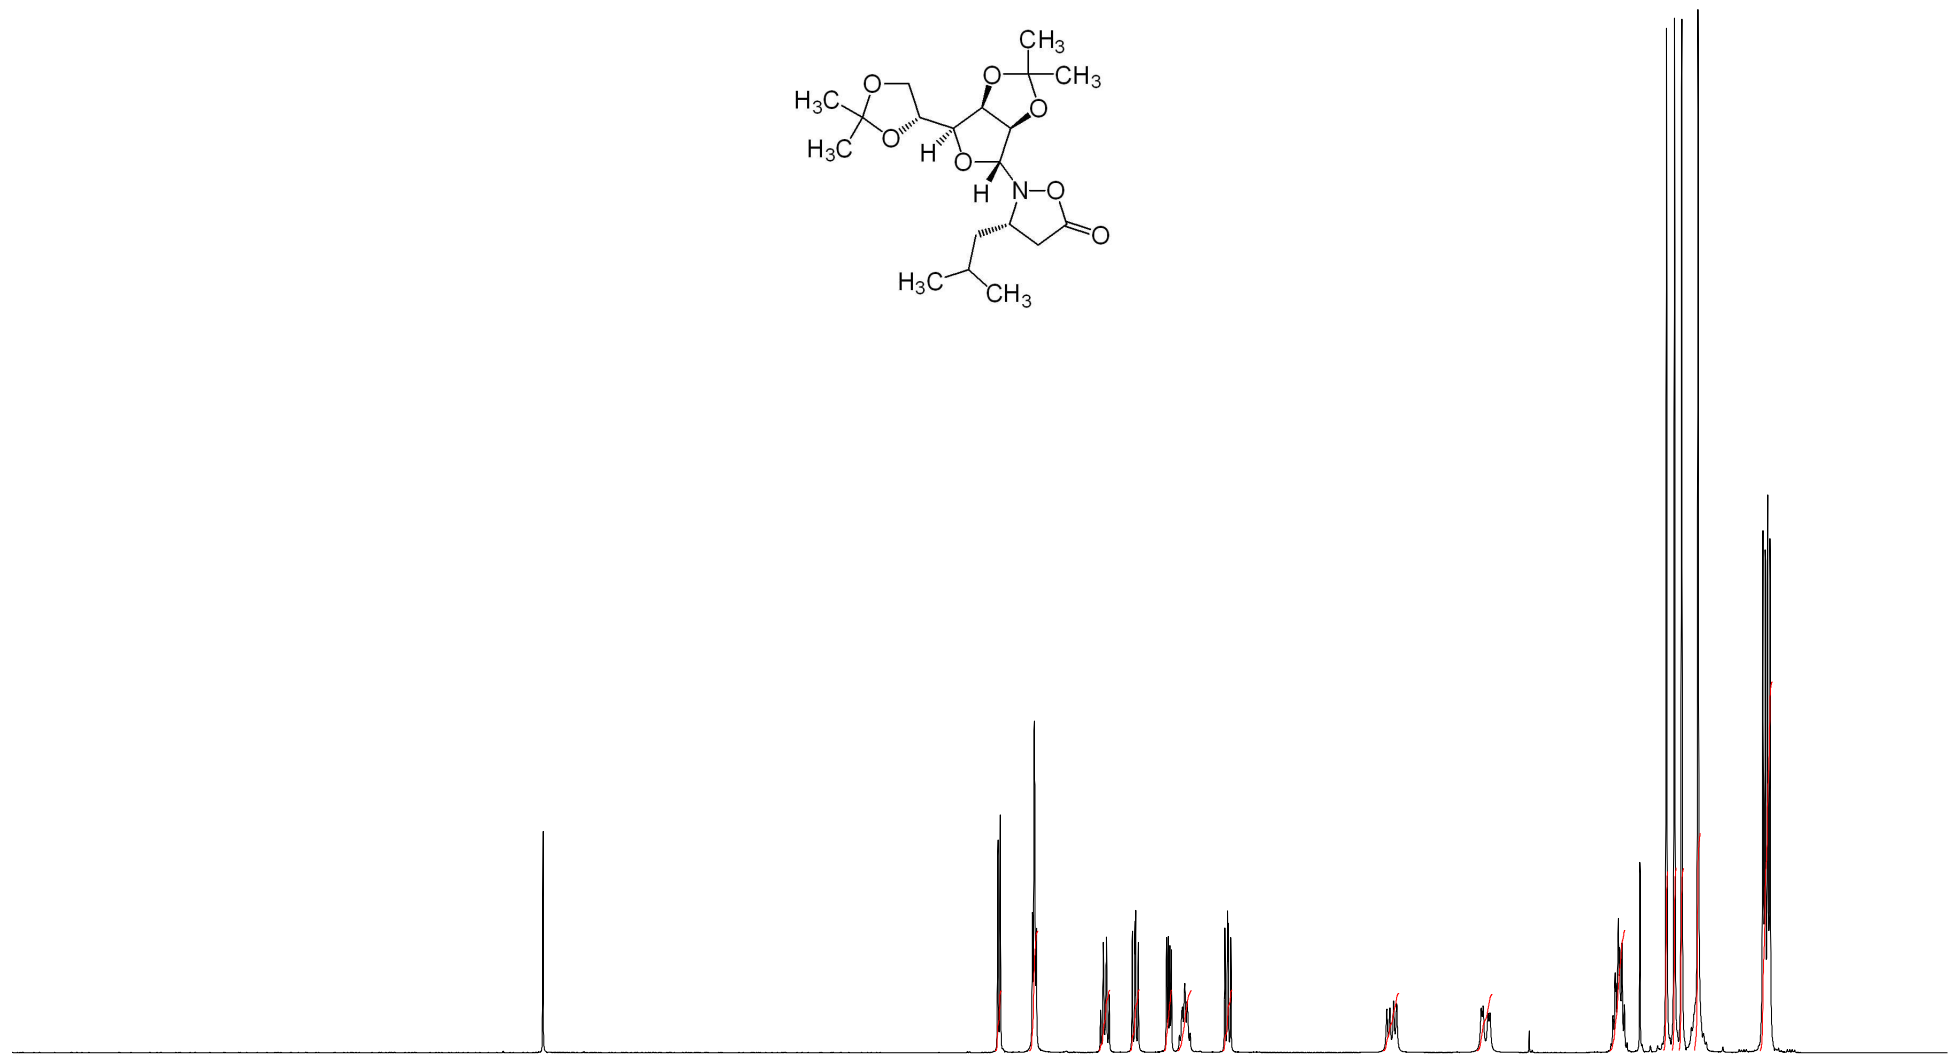

1.04  
2.08  
1.05  
1.06  
1.06  
1.05  
1.06  
1.00  
0.98  
2.10  
3.10  
3.17  
3.16  
3.77  
6.40

9.5 9.0 8.5 8.0 7.5 7.0 6.5 6.0 5.5 5.0 4.5 4.0 3.5 3.0 2.5 2.0 1.5 1.0 0.5 ppm

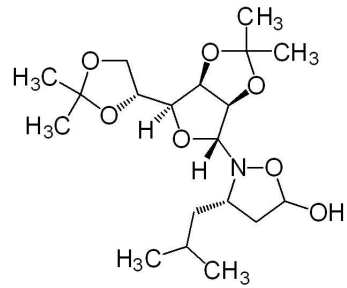

112.826  
109.793

99.465  
99.305

84.307  
83.879  
80.633  
80.463  
75.534

66.104  
59.561

44.572  
42.580

26.721  
26.200  
25.606  
25.273  
25.085  
23.061  
22.316

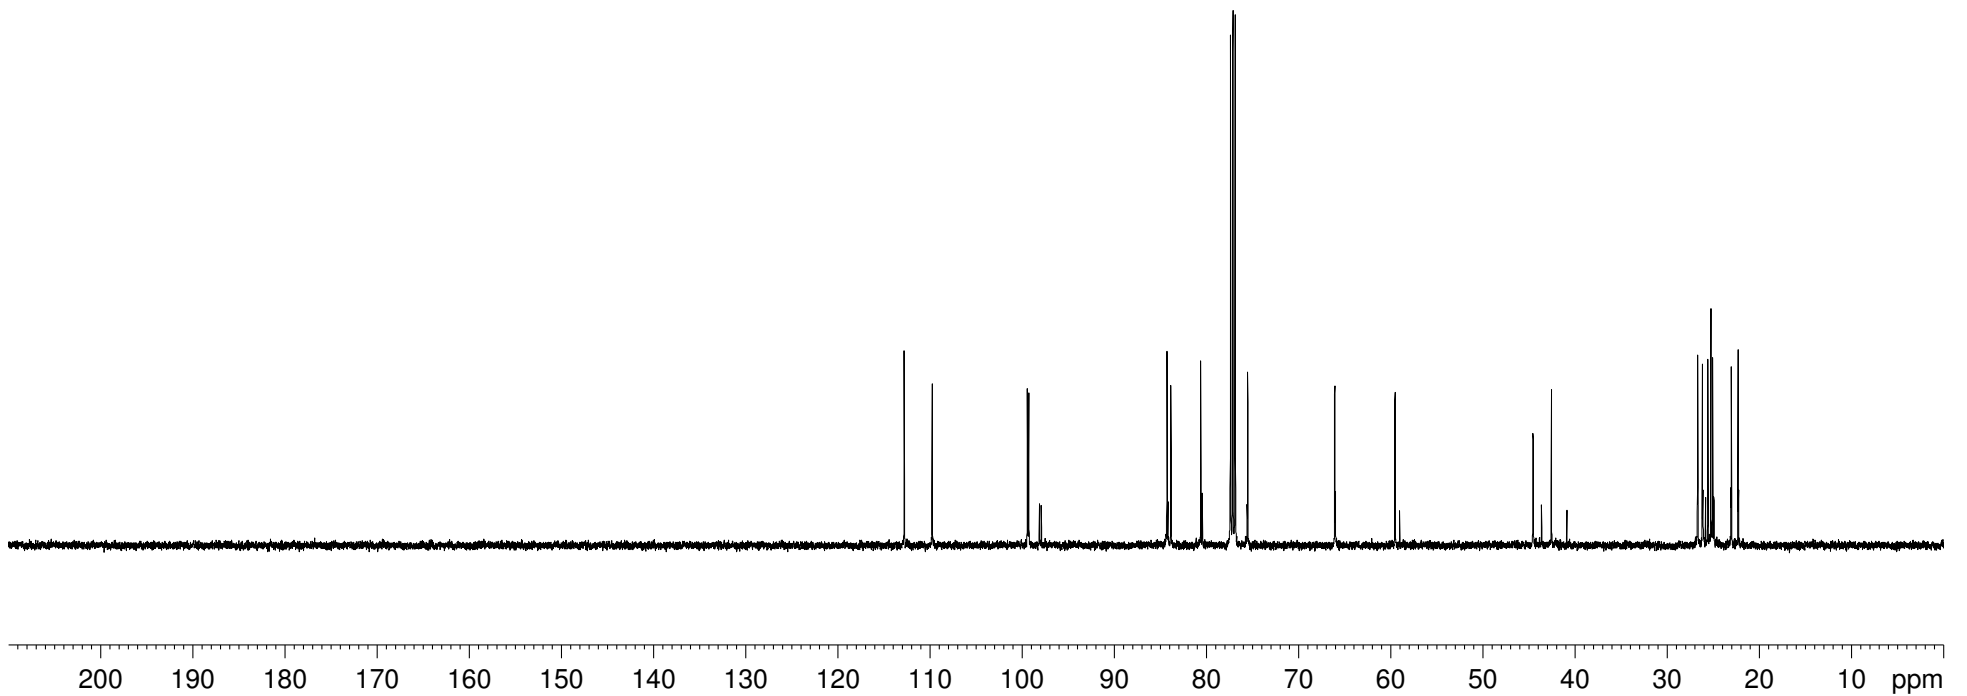

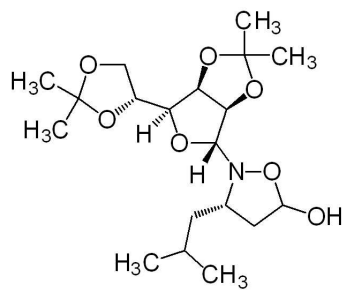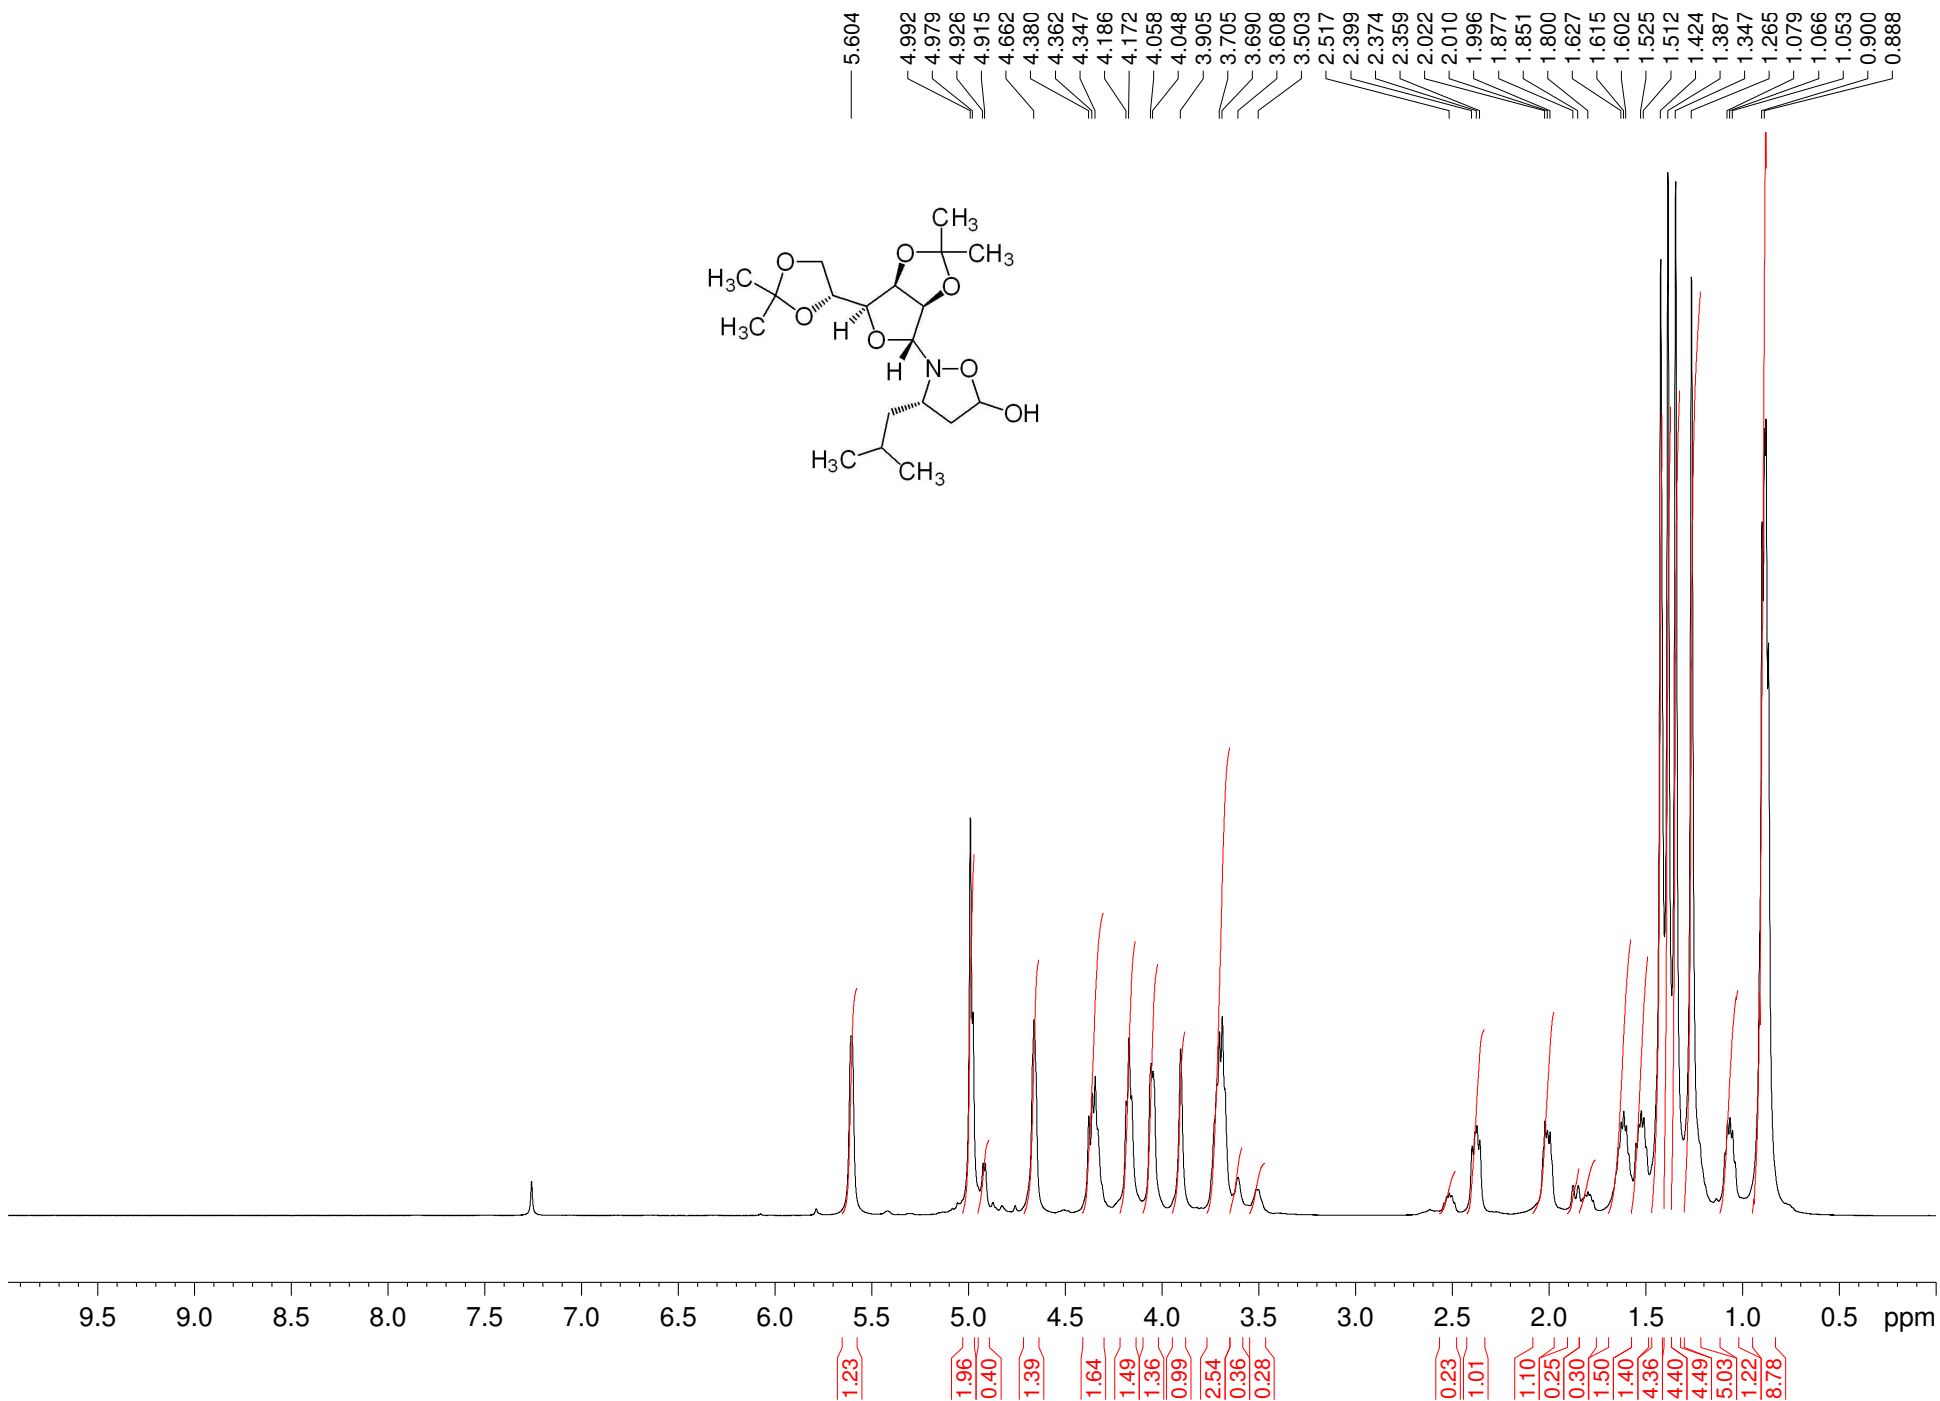

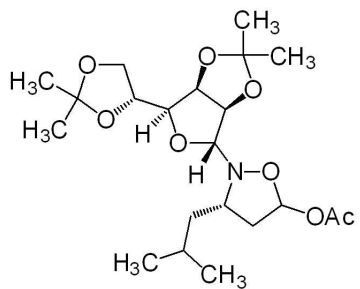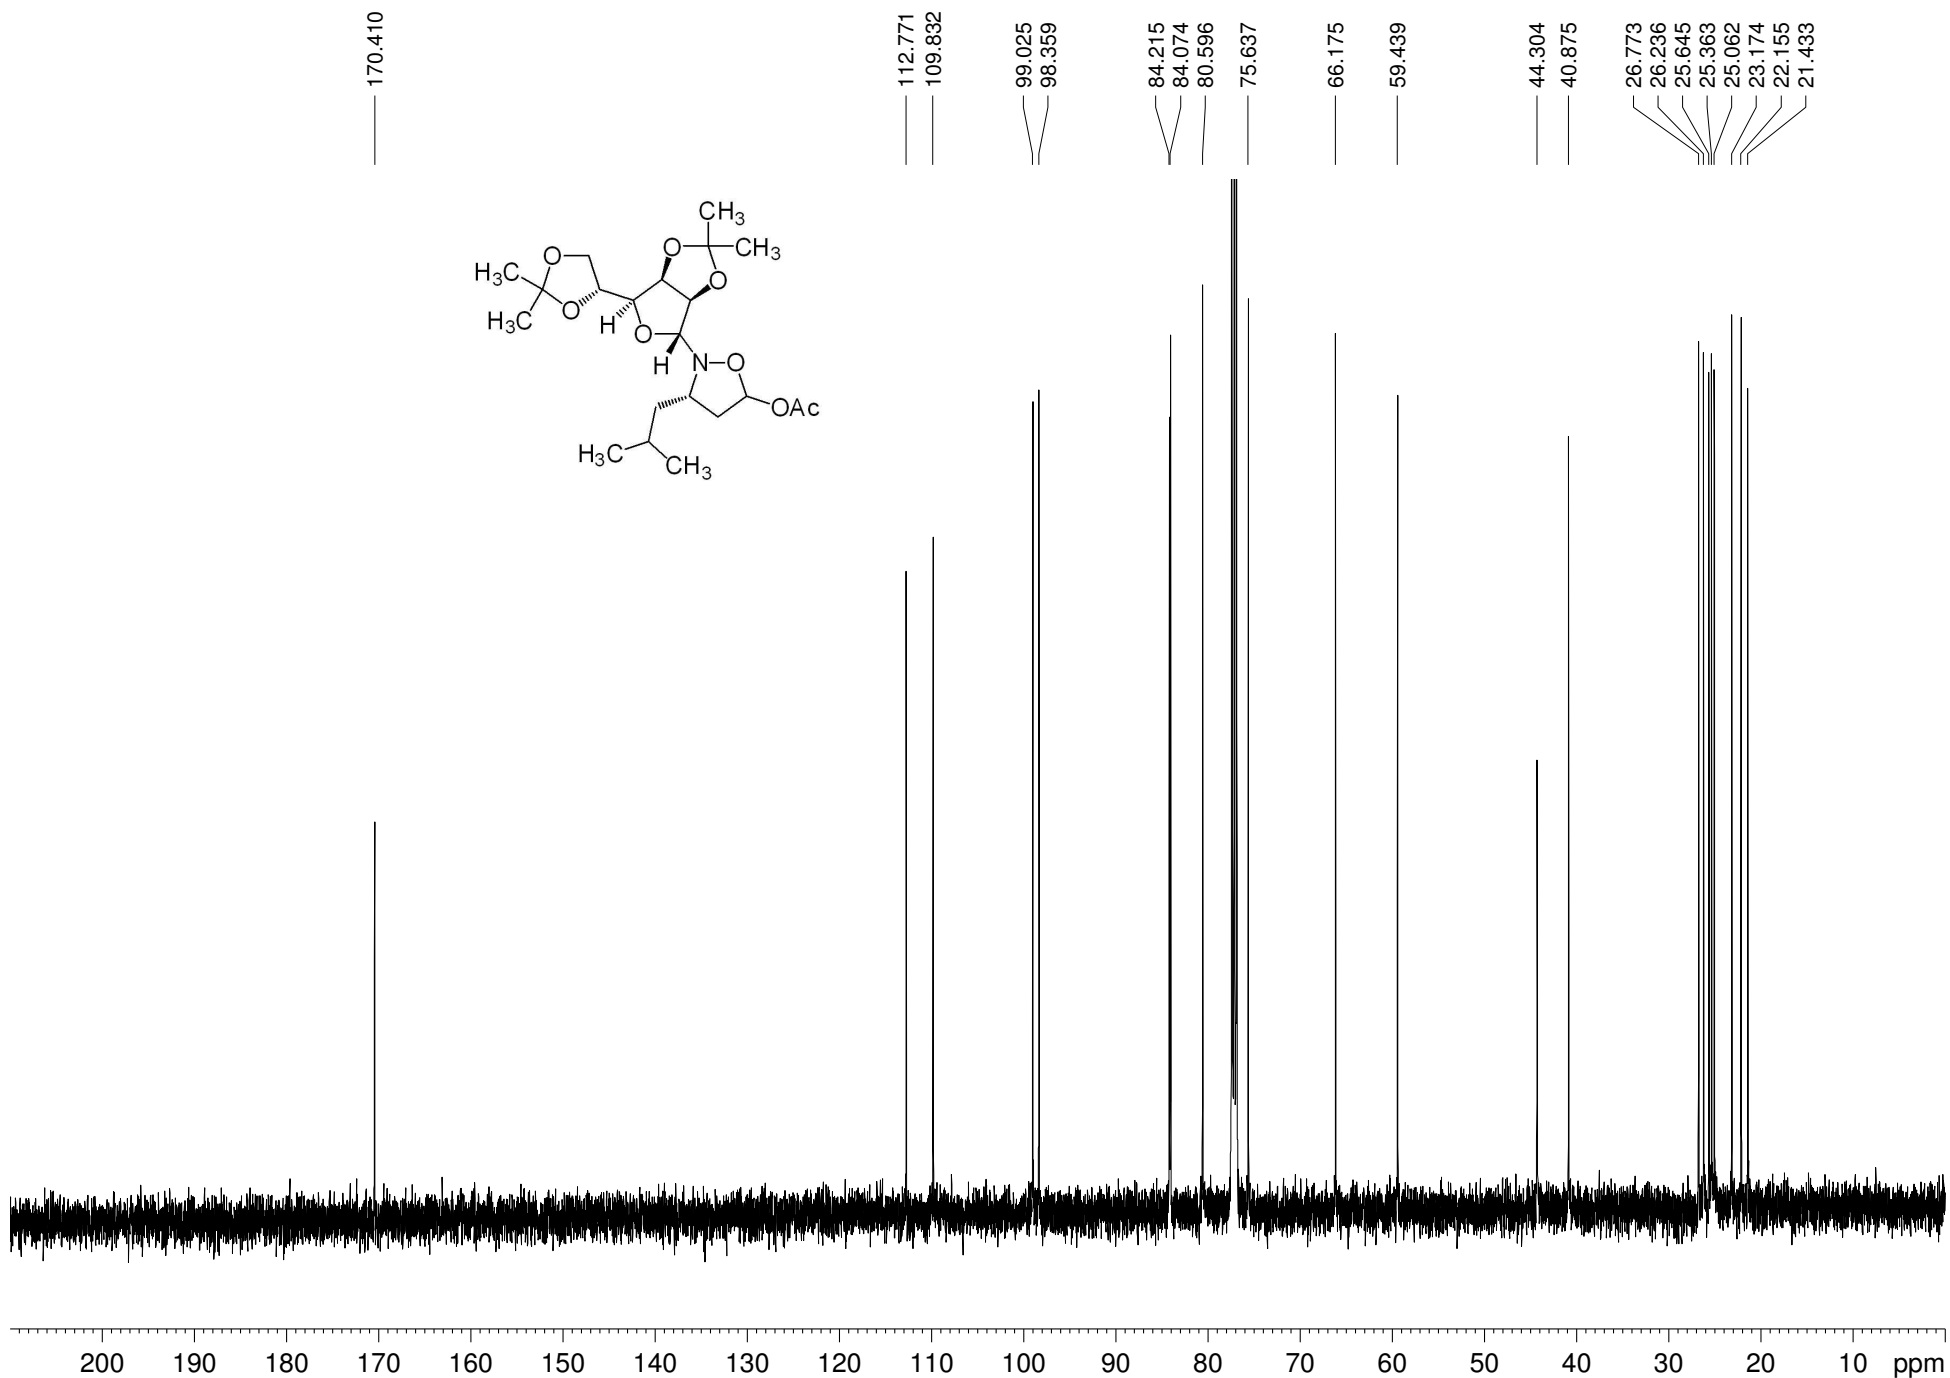

6.397  
6.387

4.913  
4.902  
4.799  
4.652  
4.377  
4.362  
4.210  
4.195  
4.181  
4.074  
4.063  
3.728  
3.713  
3.698

2.521  
2.506  
2.494  
2.479  
2.178  
2.165  
2.151  
2.071  
1.675  
1.663  
1.650  
1.614  
1.596  
1.568  
1.555  
1.429  
1.408  
1.372  
1.261  
1.115  
1.102  
1.089  
0.932  
0.919  
0.905

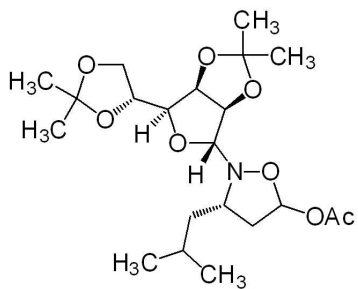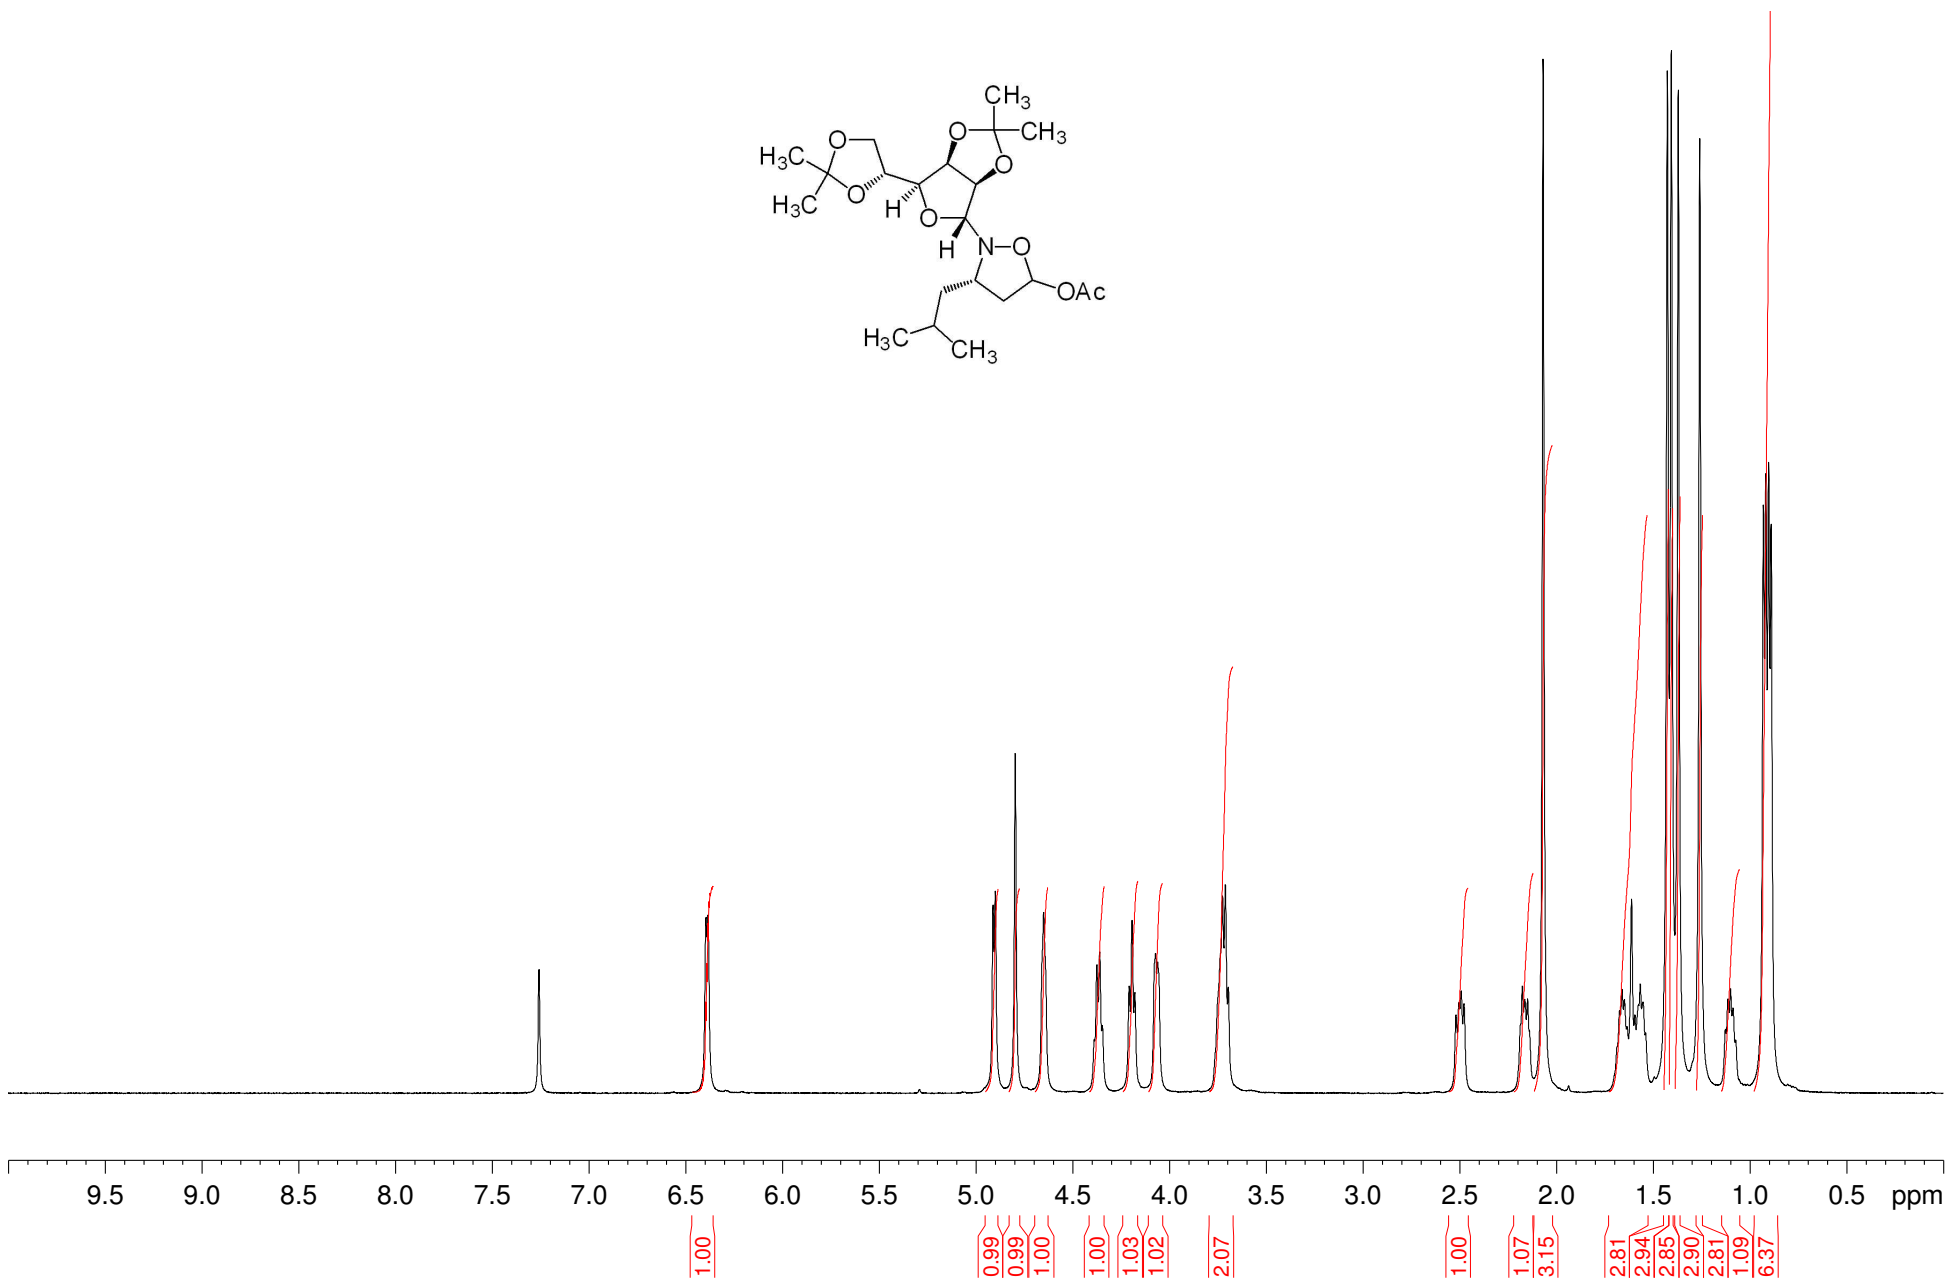



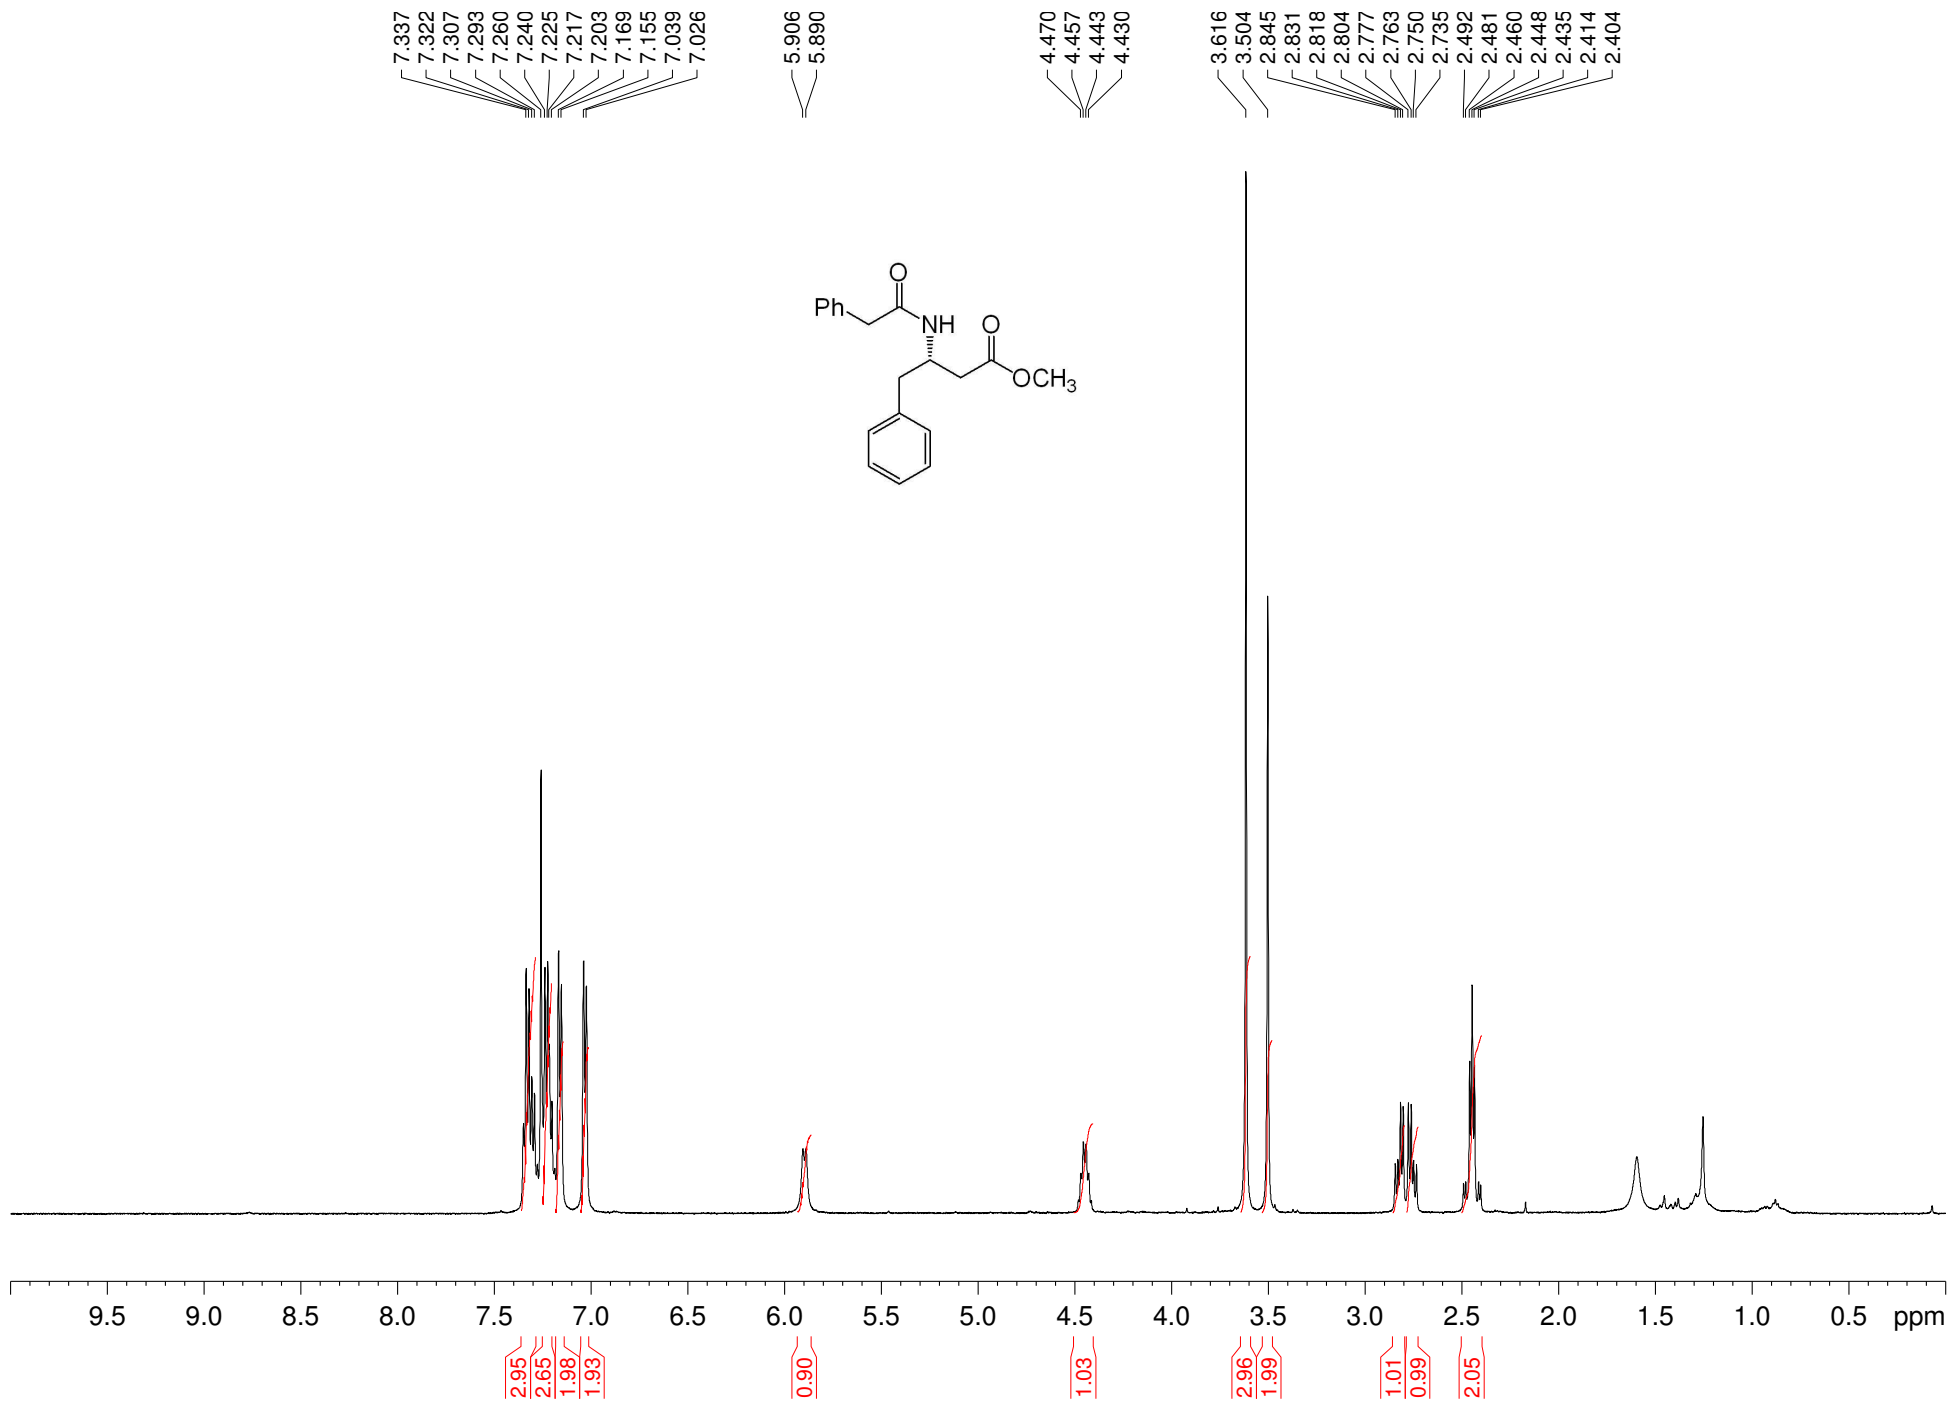

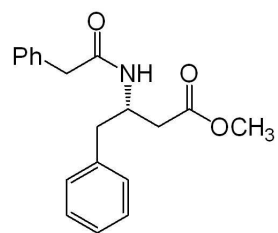

172.064  
170.447

137.359  
134.850  
129.553  
129.401  
129.104  
128.682  
127.431  
126.810

51.824  
47.476  
44.097  
39.789  
37.169

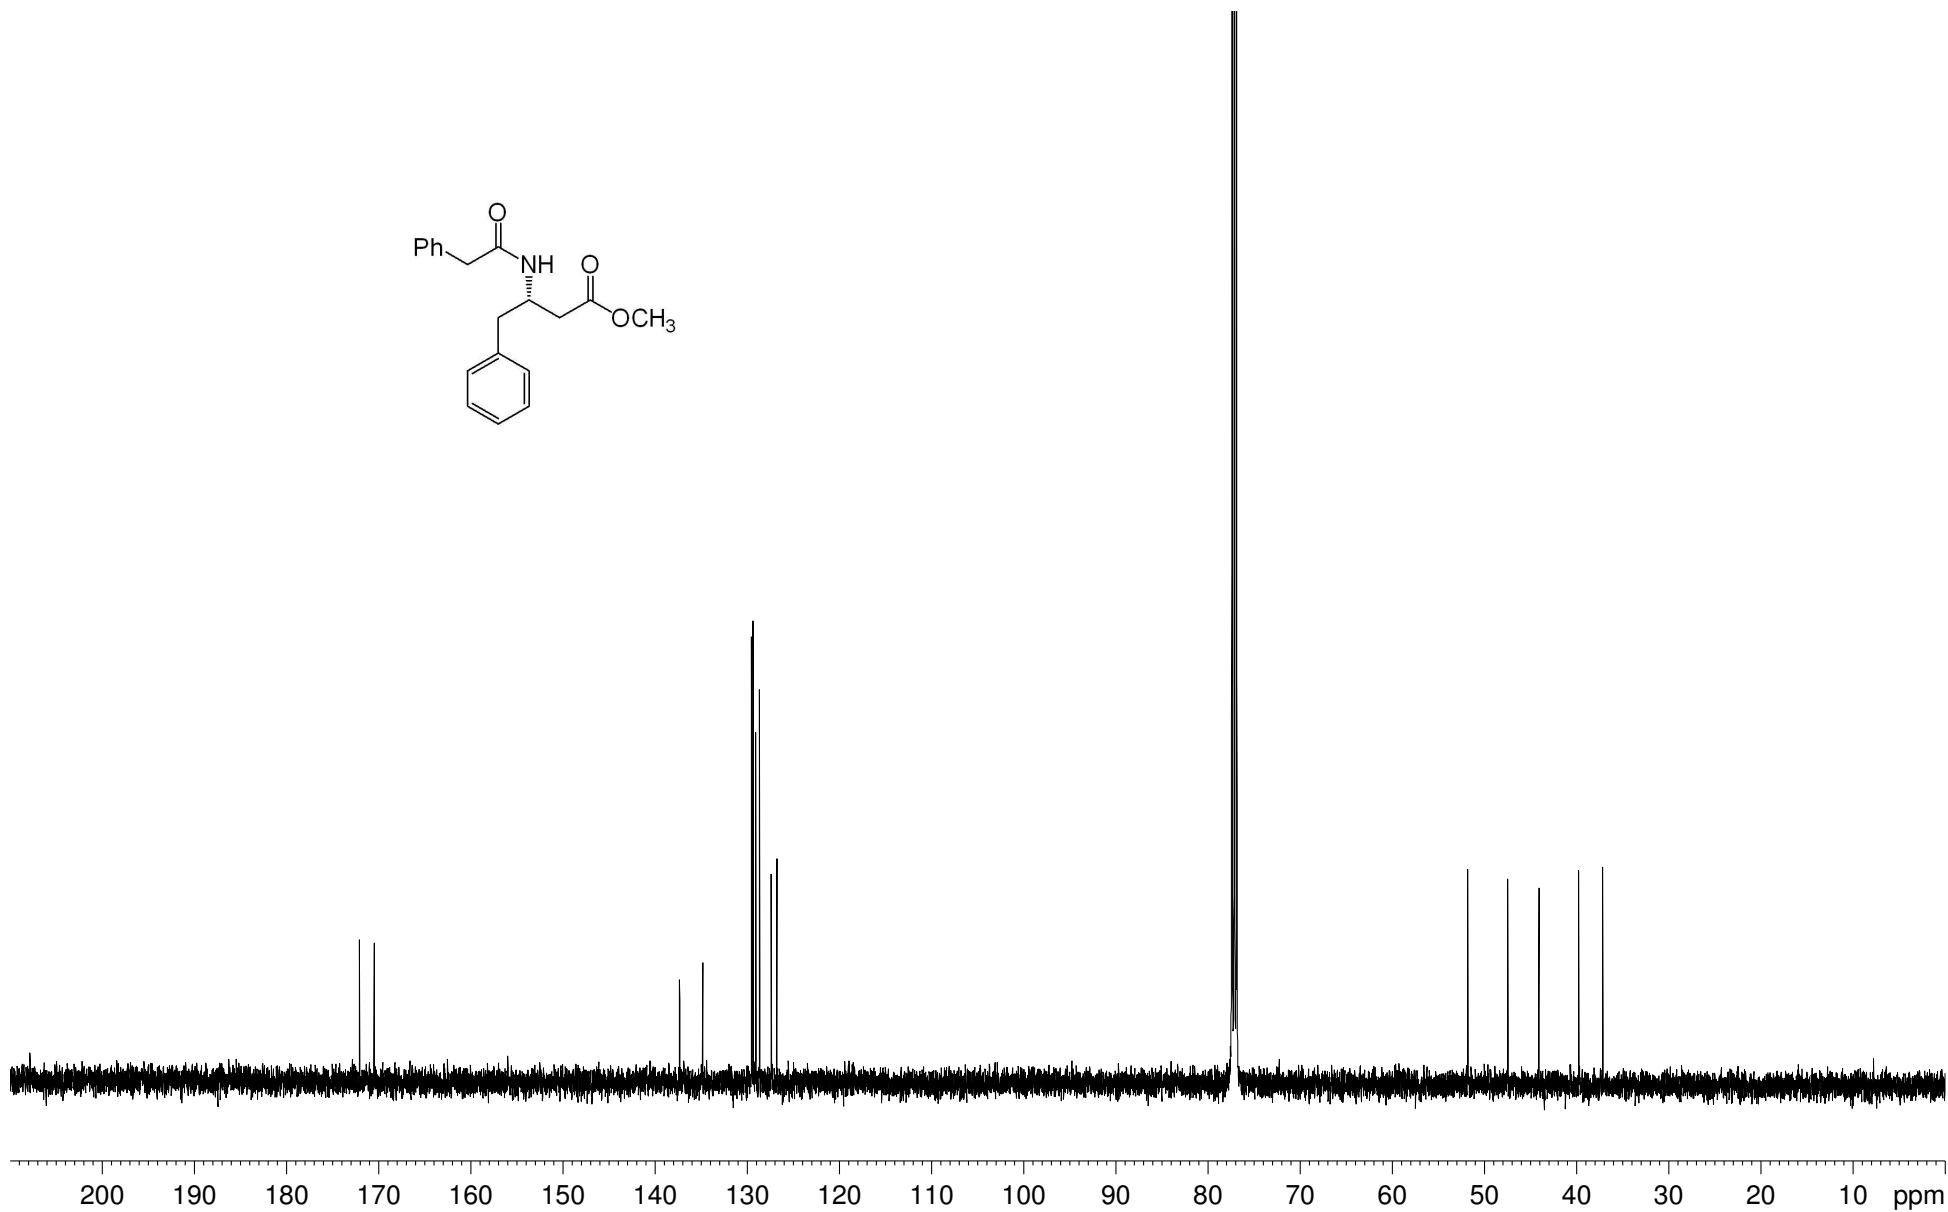

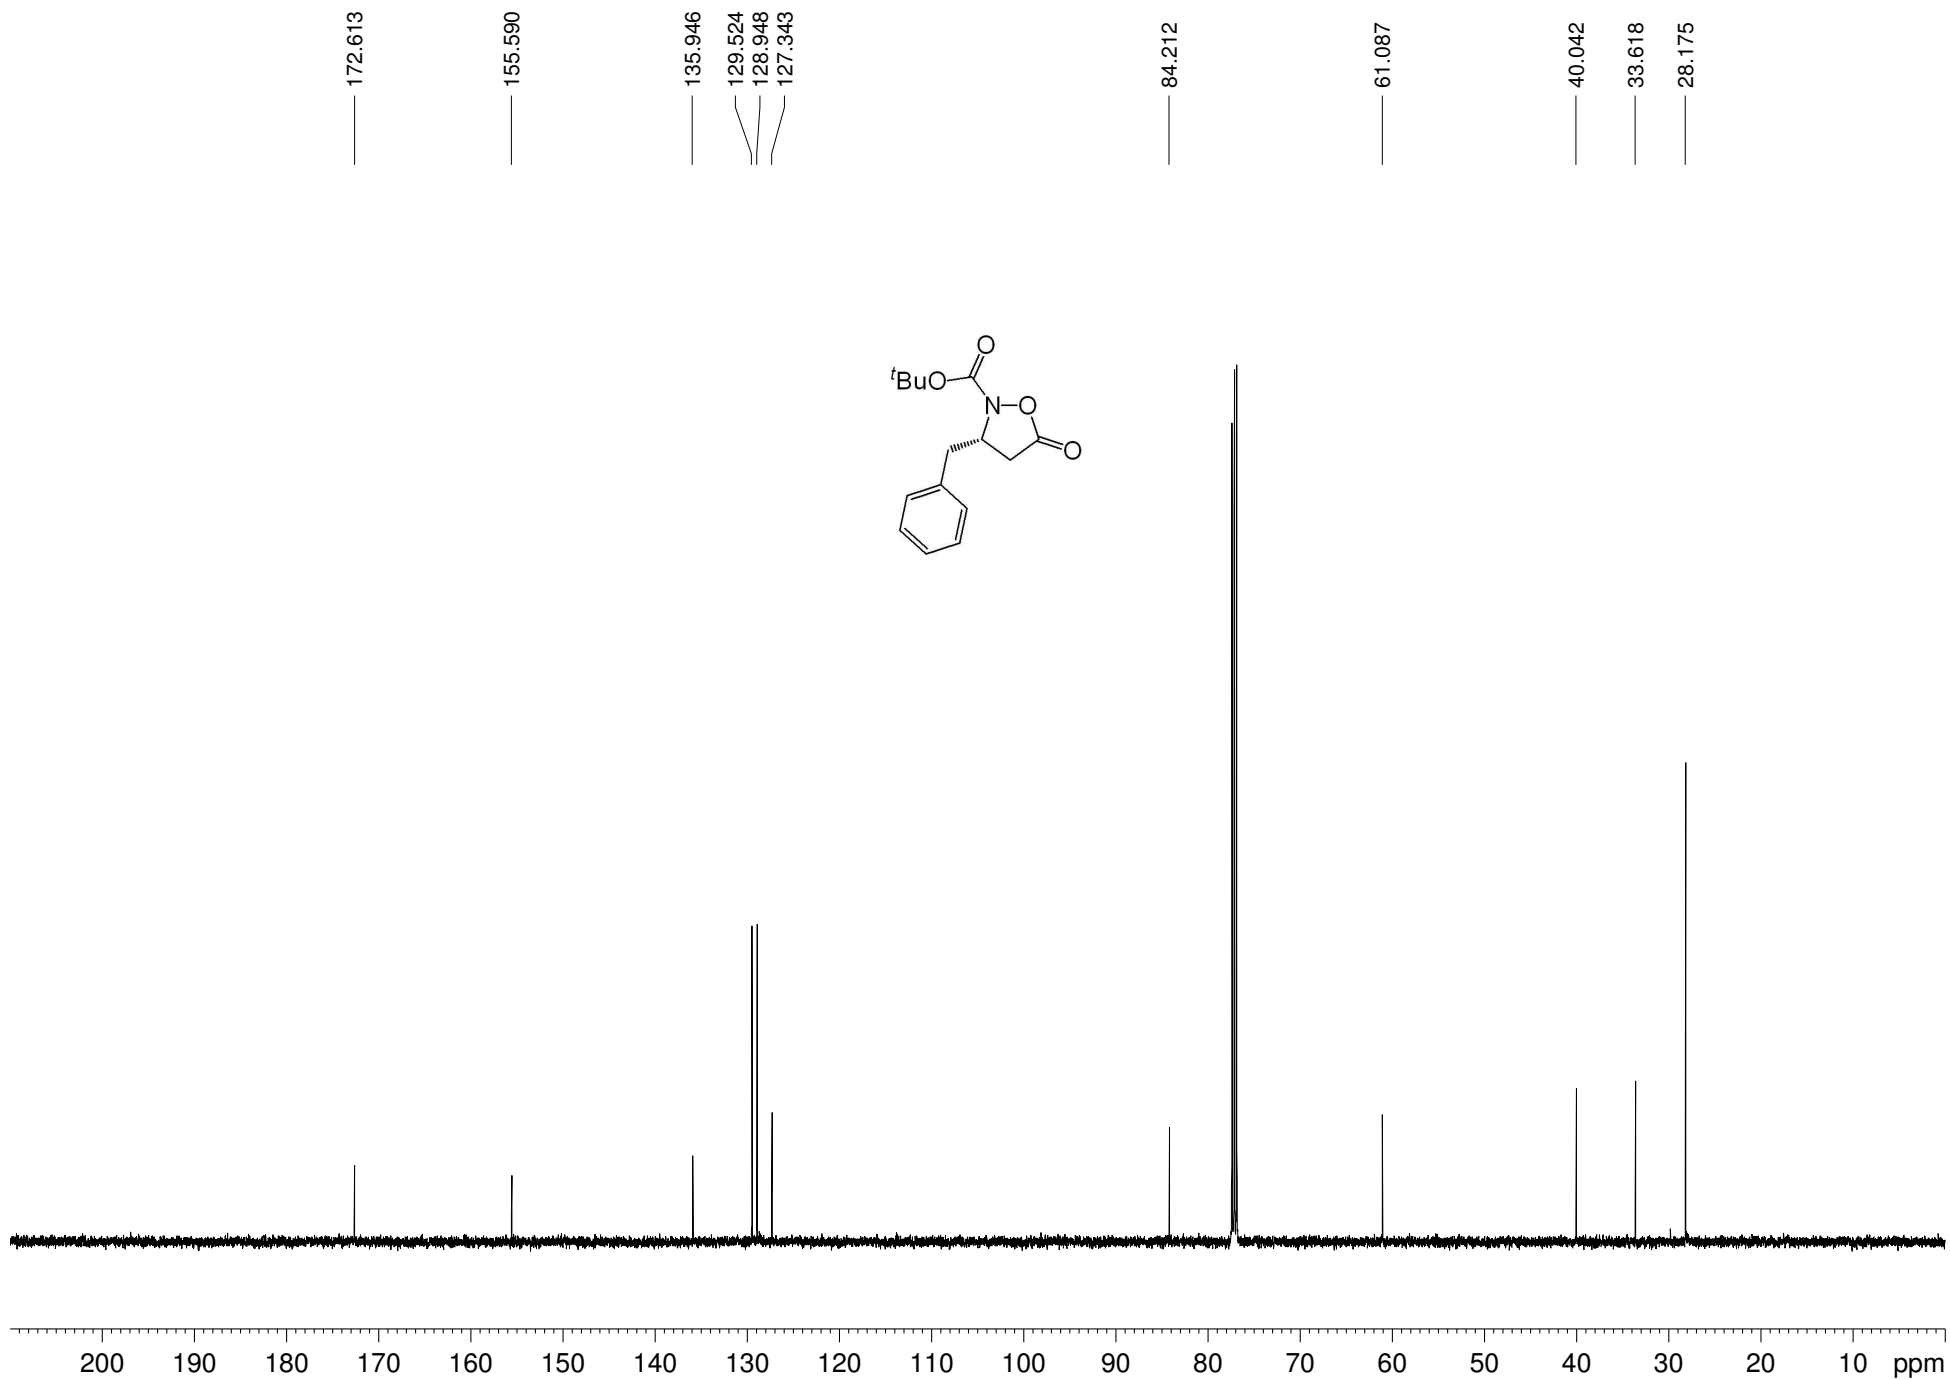

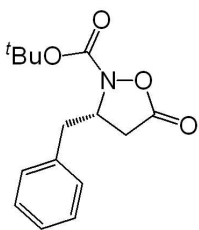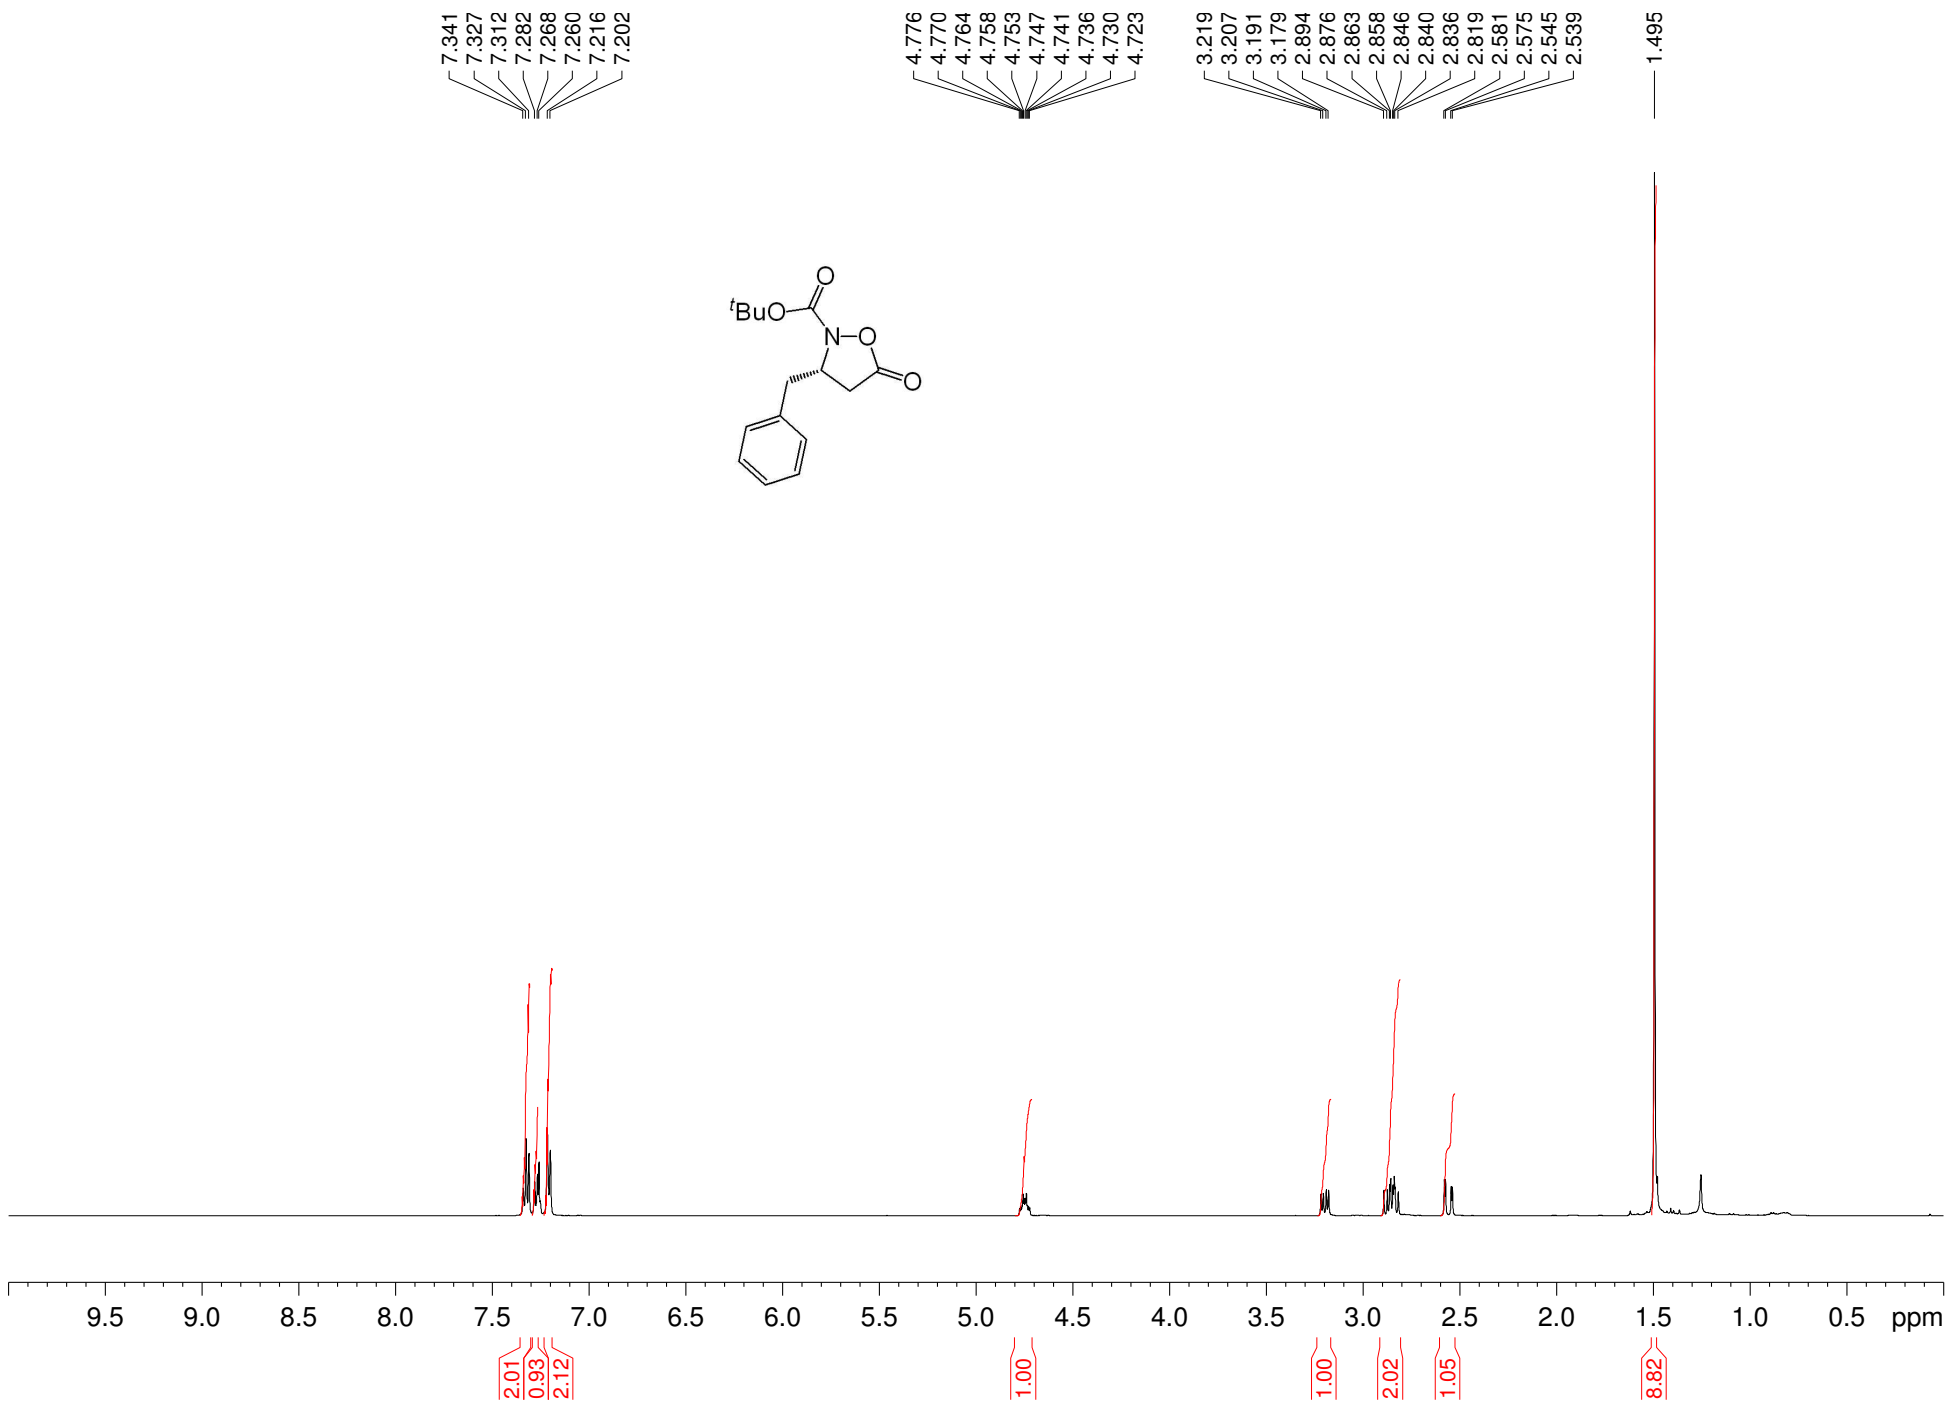

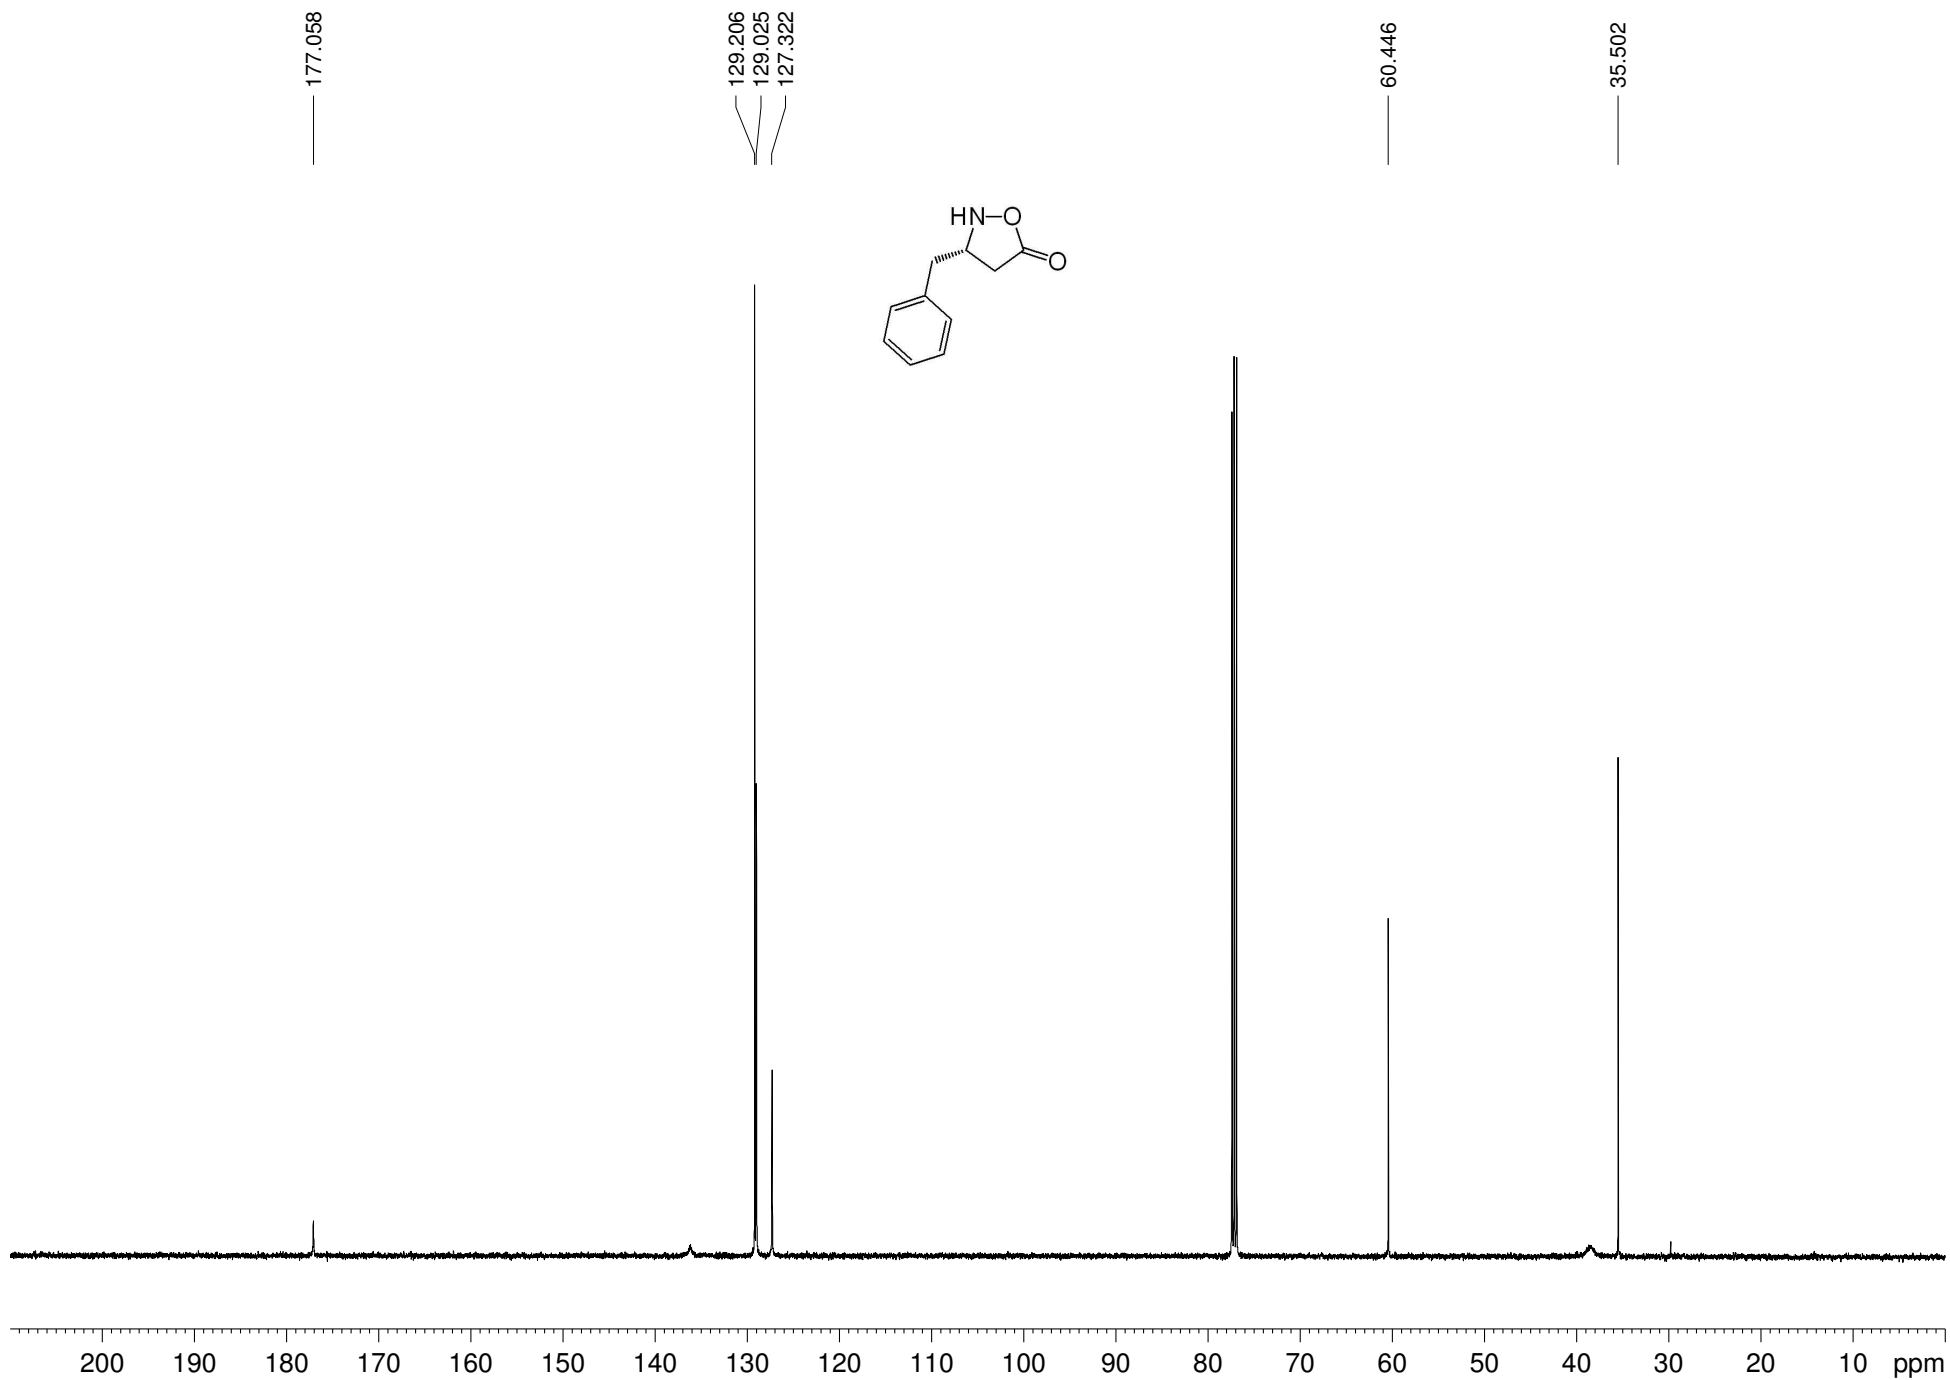

7.353  
7.338  
7.323  
7.288  
7.274  
7.260  
7.197  
7.182

4.085  
4.075  
3.023  
3.009  
2.995  
2.981  
2.874  
2.860  
2.846  
2.832  
2.778  
2.764  
2.744  
2.730  
2.552  
2.536  
2.517  
2.502

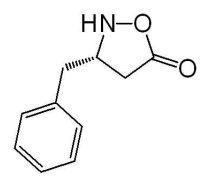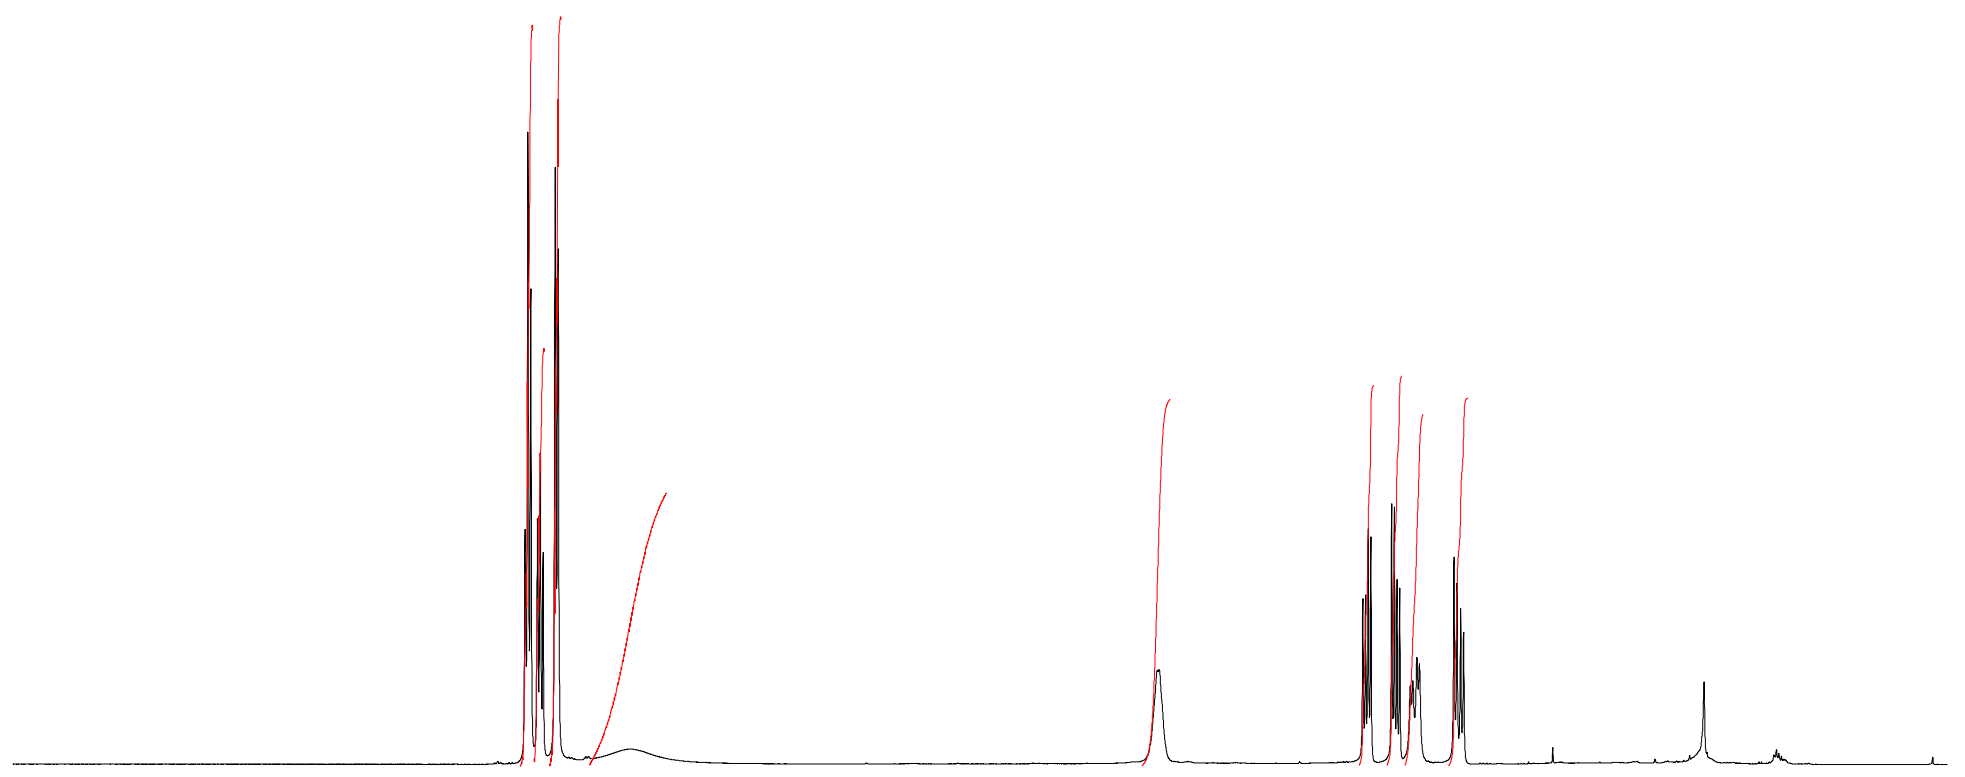

1.96  
1.10  
1.98  
0.72

0.96

1.00  
1.02  
0.92  
0.97

9.5 9.0 8.5 8.0 7.5 7.0 6.5 6.0 5.5 5.0 4.5 4.0 3.5 3.0 2.5 2.0 1.5 1.0 0.5 ppm

— 175.474

— 136.933

— 129.379

— 128.687

— 126.904

— 113.075

— 109.759

— 97.782

— 84.805

— 84.106

— 80.012

— 75.599

— 65.907

— 61.420

— 39.774

— 33.113

— 26.868

— 25.968

— 25.340

— 24.617

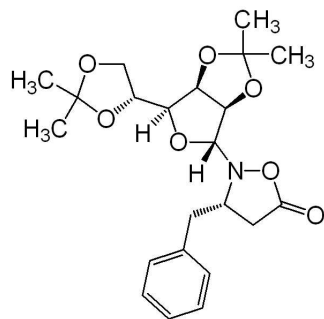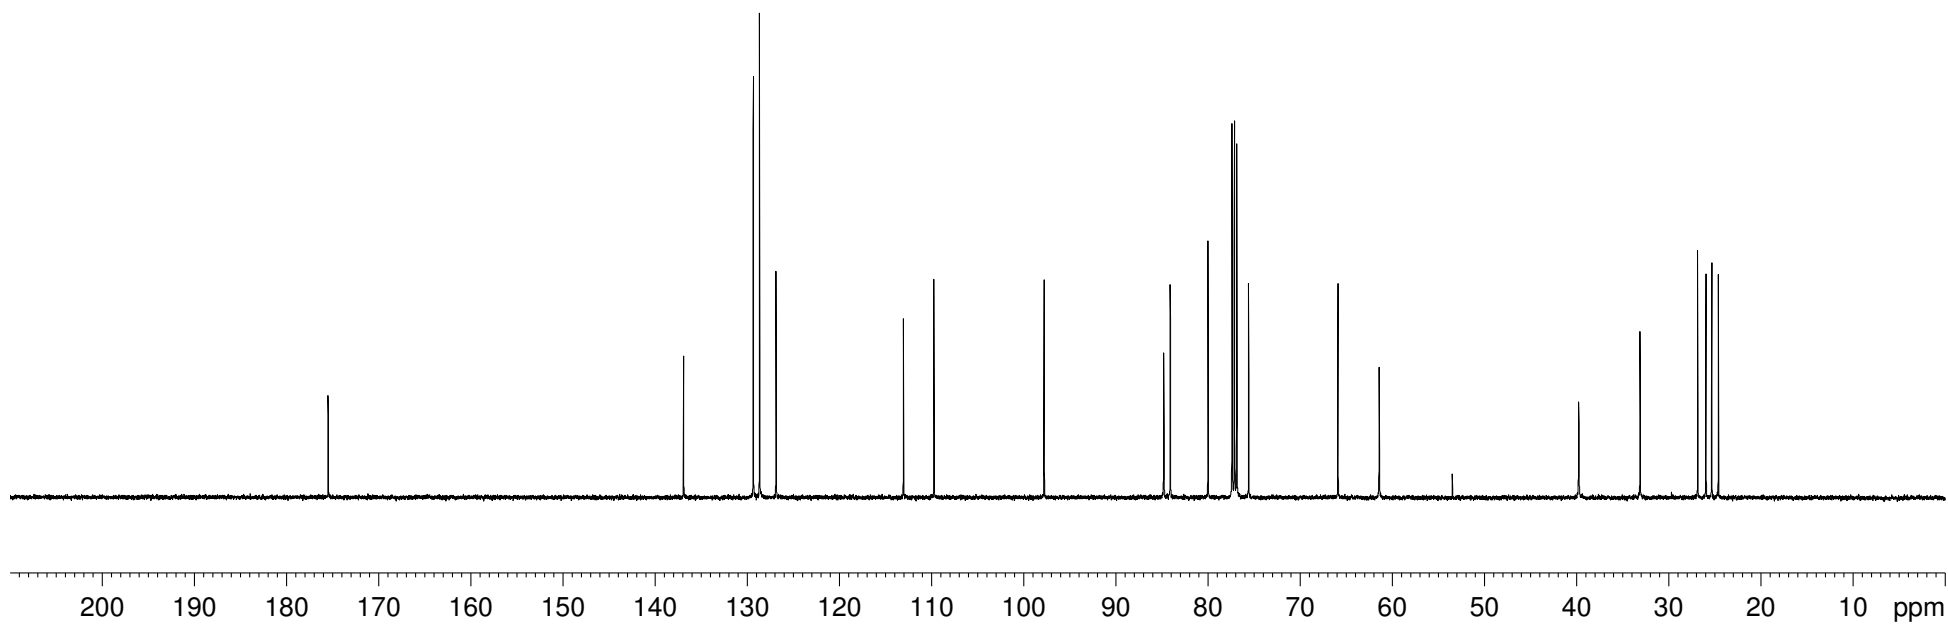

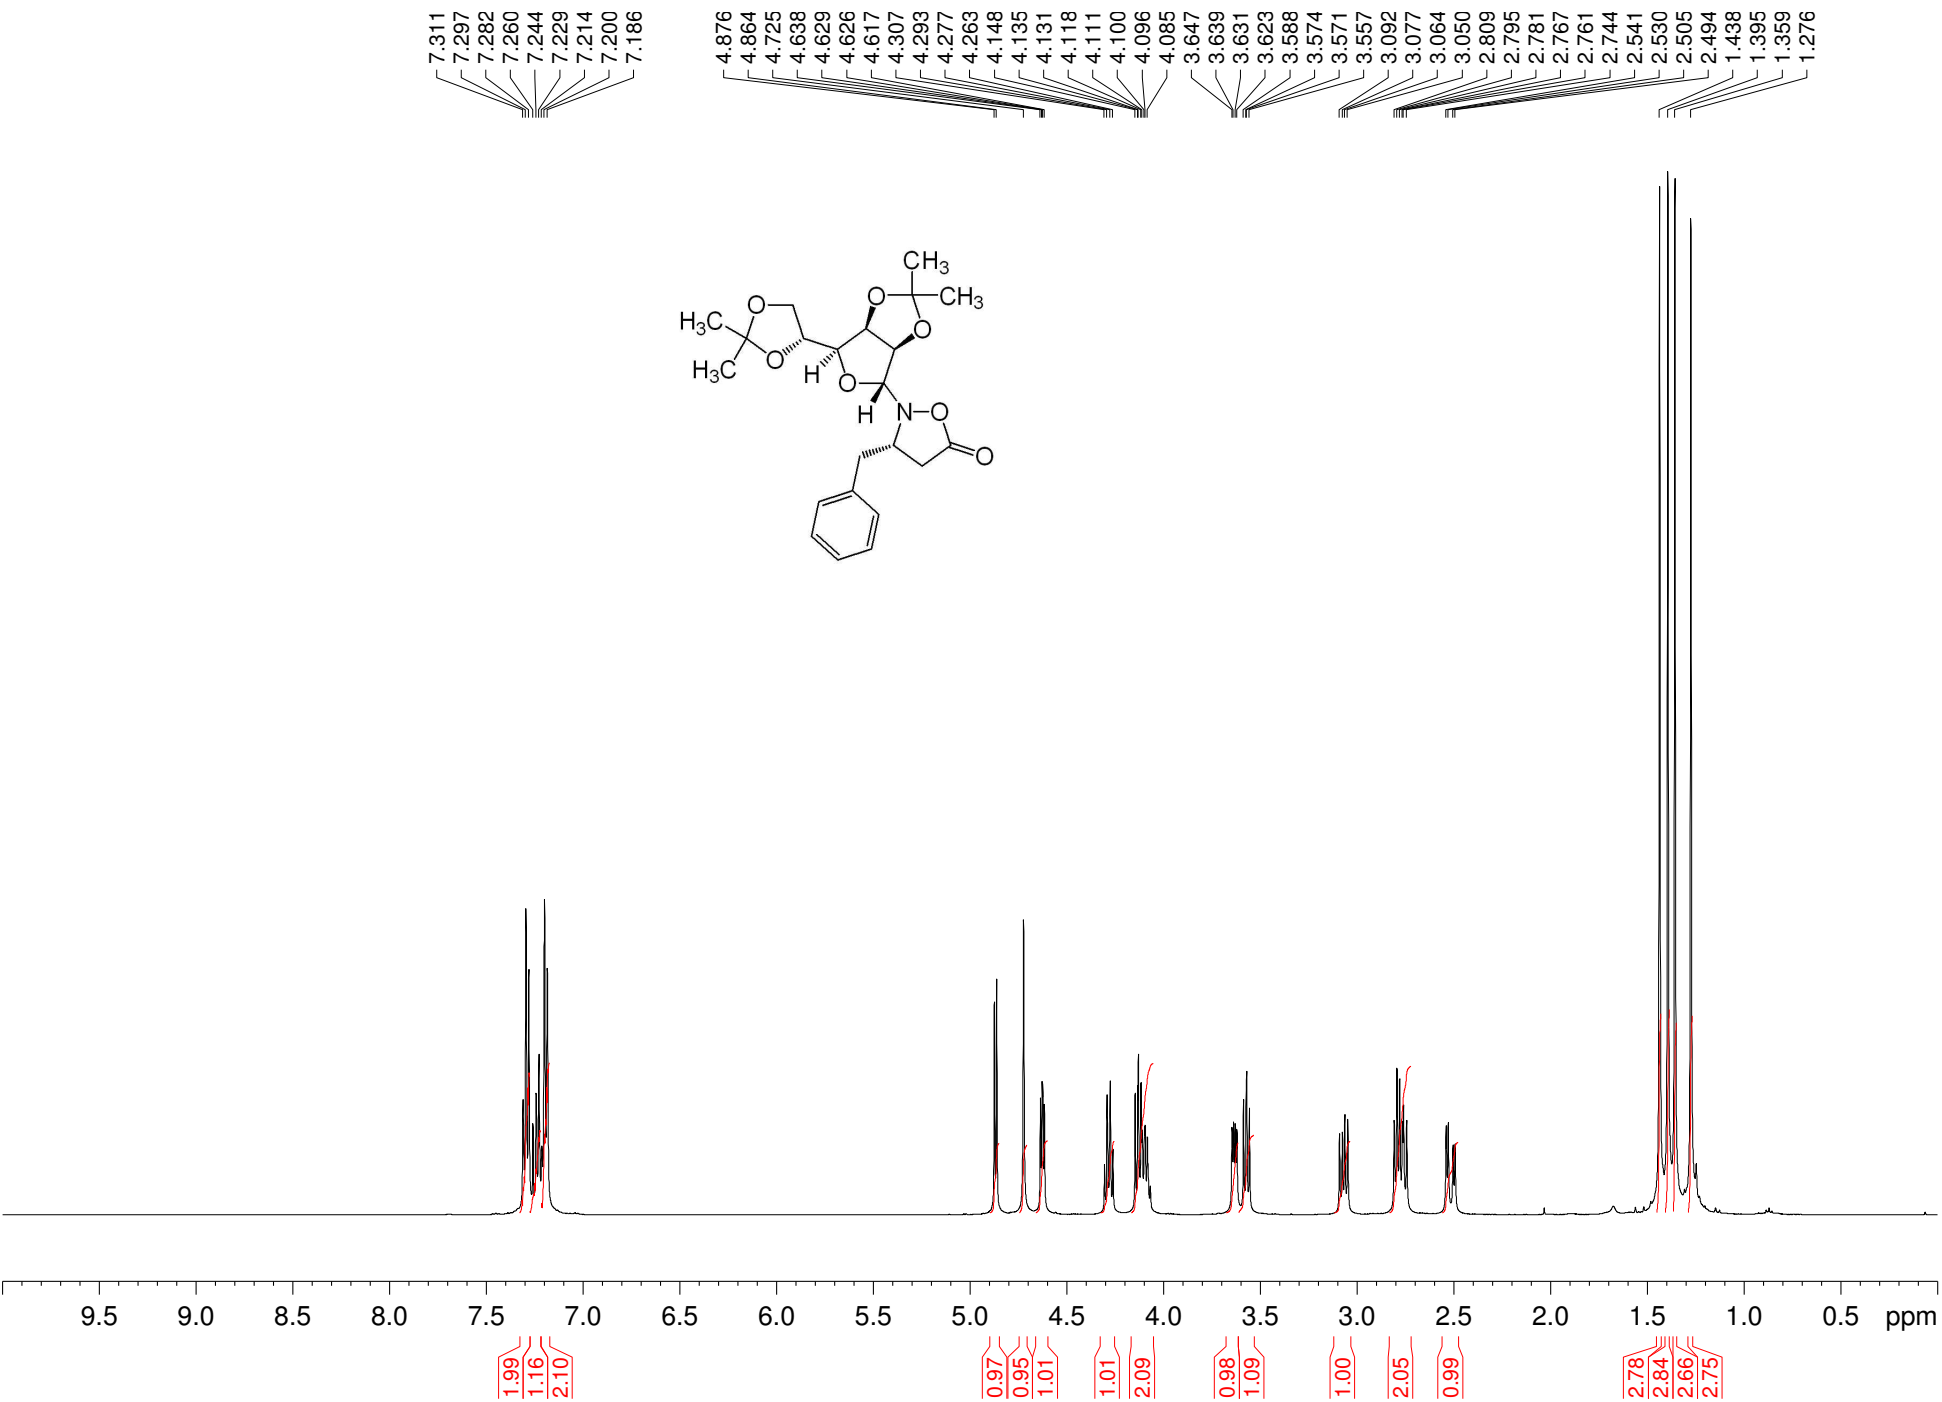



168.230  
167.862

137.537  
137.504  
129.437  
128.817  
128.763  
126.985  
126.926  
114.970  
114.460  
113.605  
113.157  
113.095  
110.064  
109.874  
109.799  
100.997  
98.280  
97.475  
96.715  
95.281  
85.387  
84.657  
84.514  
84.278  
83.949  
80.344  
80.091  
79.603  
75.621  
75.538  
66.029  
63.207  
62.571

47.016  
45.810  
39.872  
39.350  
26.952  
26.140  
26.058  
25.475  
25.375  
24.864  
24.784  
21.067  
21.037

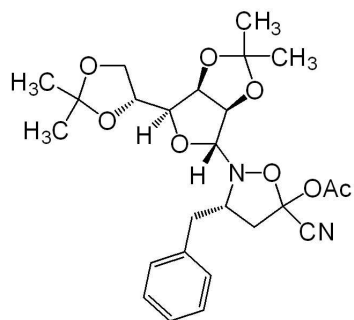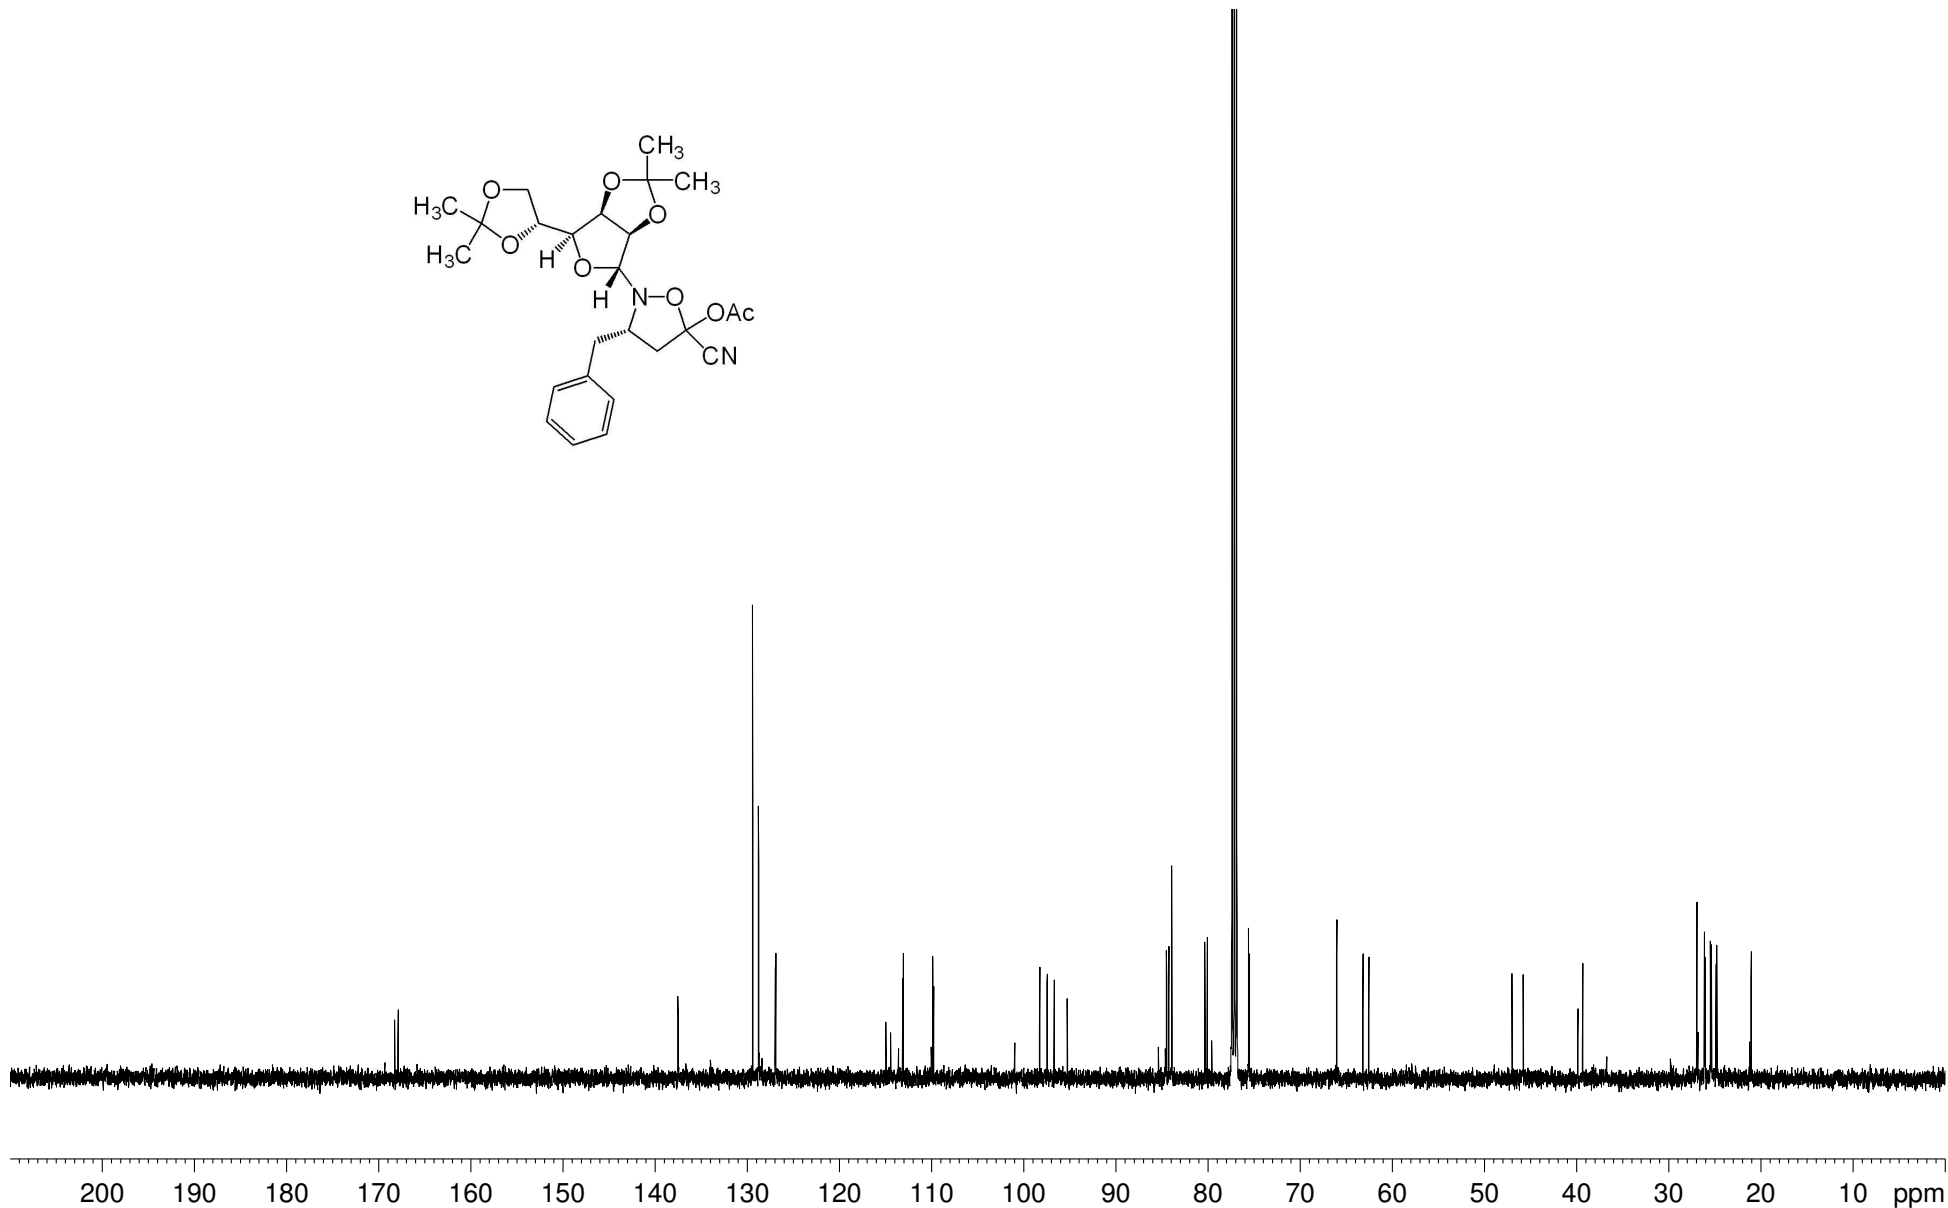

7.315  
7.300  
7.285  
7.260  
7.244  
7.232  
7.227  
7.217  
7.202  
7.184  
7.169  
4.933  
4.921  
4.844  
4.832  
4.703  
4.684  
4.670  
4.615  
4.608  
4.602  
4.596  
4.589  
4.289  
4.274  
4.260  
4.147  
4.133  
4.130  
4.117  
4.044  
3.750  
3.743  
3.734  
3.726  
3.647  
3.639  
3.630  
3.622  
3.602  
3.585  
3.571  
3.554  
3.108  
3.103  
3.094  
3.088  
3.082  
3.075  
3.067  
3.061  
2.985  
2.970  
2.957  
2.941  
2.853  
2.842  
2.775  
2.755  
2.748  
2.738  
2.731  
2.687  
2.680  
2.659  
2.652  
2.192  
2.137  
2.051  
1.462  
1.455  
1.437  
1.414  
1.382  
1.359  
1.351  
1.291  
1.257

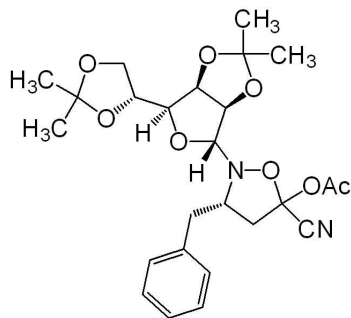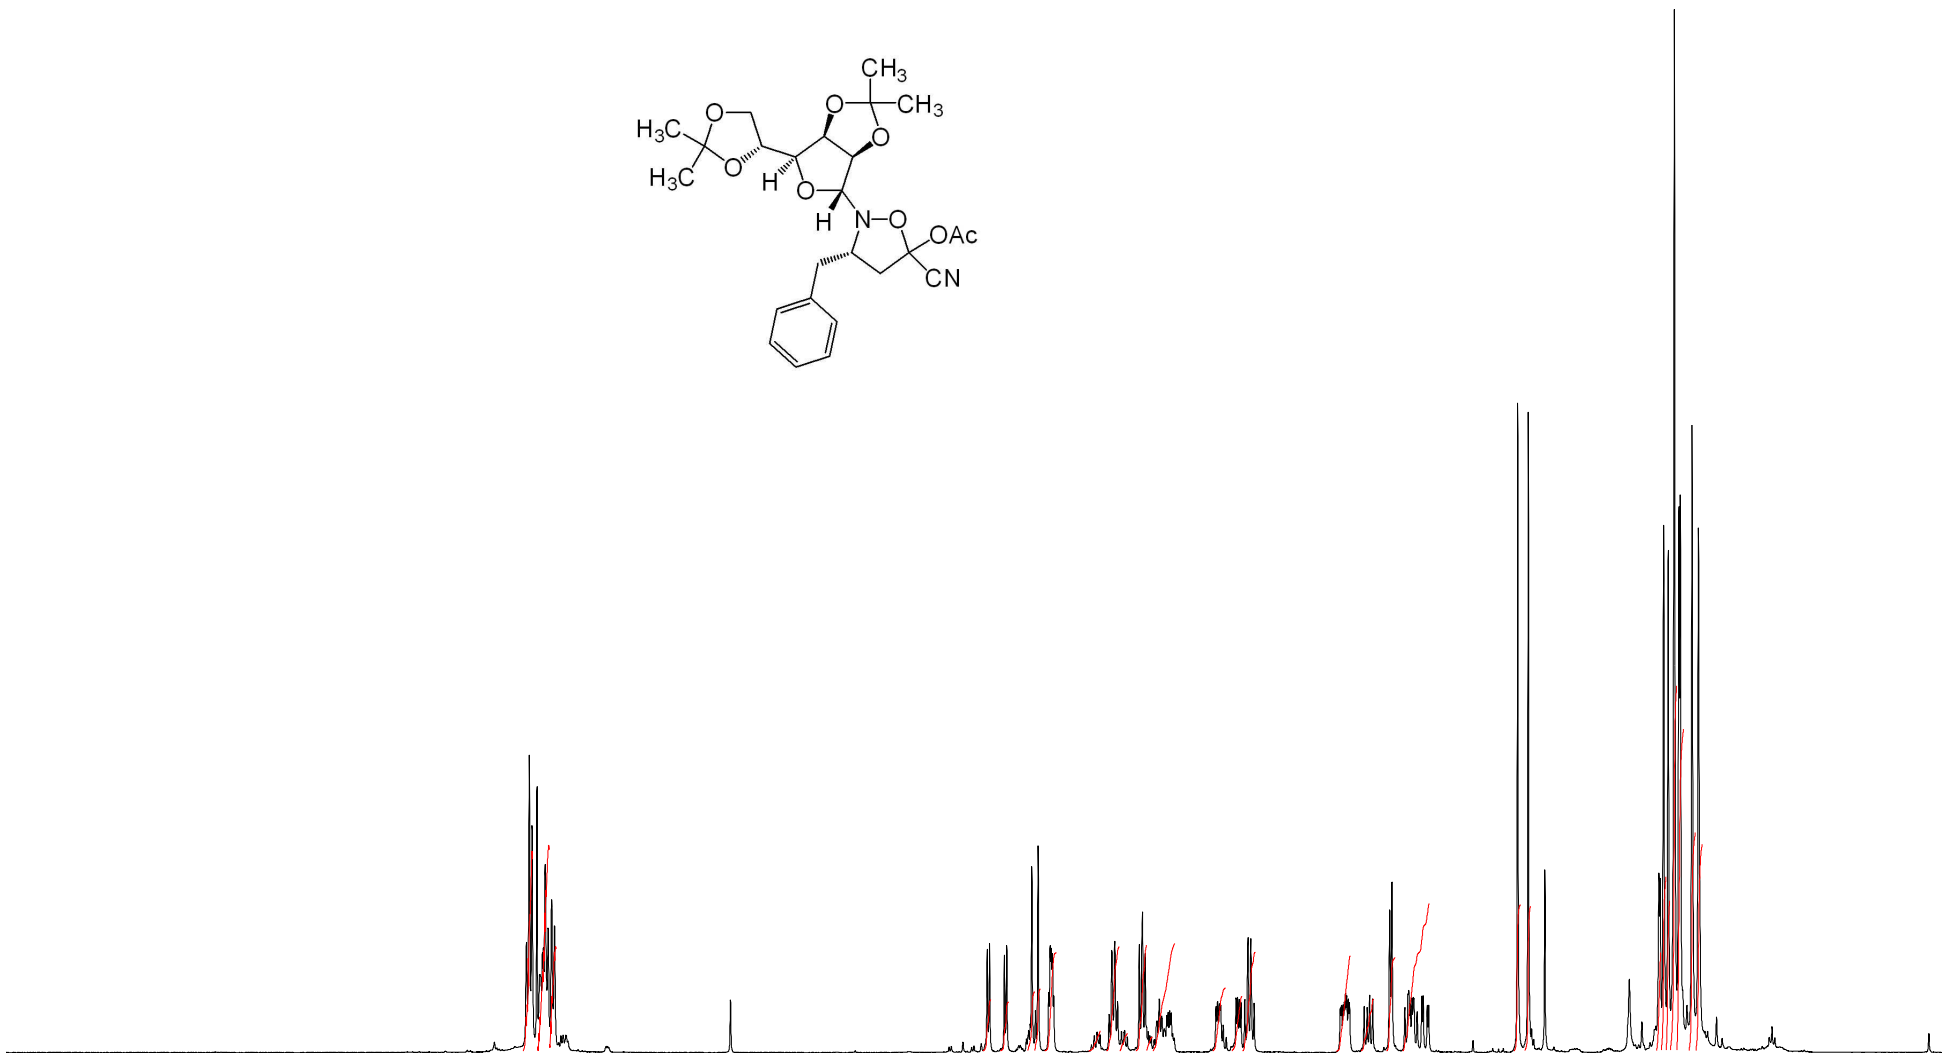

9.5 9.0 8.5 8.0 7.5 7.0 6.5 6.0 5.5 5.0 4.5 4.0 3.5 3.0 2.5 2.0 1.5 1.0 0.5 ppm

3.89  
3.93  
1.99

0.98  
0.94  
1.14  
1.19  
1.88  
0.39  
2.00  
0.35  
2.03  
2.05  
1.21  
1.05  
1.89

1.83  
1.00  
1.79  
2.82

2.80  
2.78

1.89  
3.33  
2.87  
6.98  
6.16  
4.18  
3.96

172.246  
170.527

135.087  
129.481  
129.062  
127.401

51.758  
51.592

44.131

36.477

31.423

19.363  
18.740

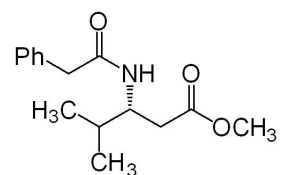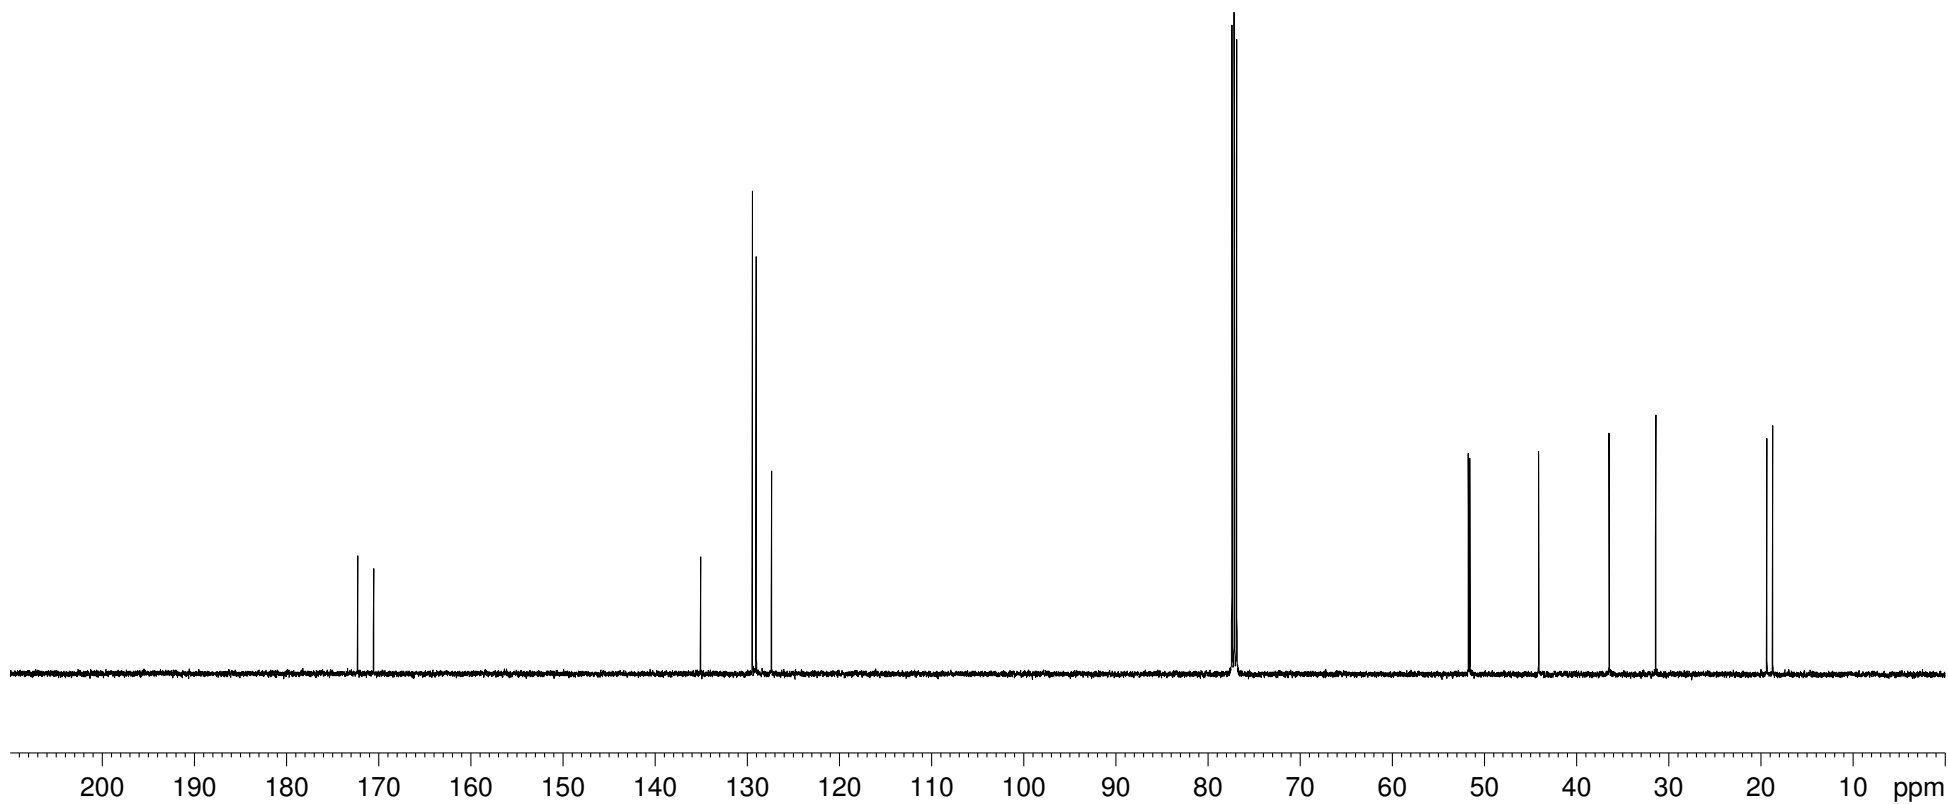

7.362  
7.348  
7.333  
7.295  
7.281  
7.260  
7.244

5.846  
5.829

4.035  
4.020  
4.003

3.578  
3.559  
3.555

2.447  
2.436

1.740  
1.726  
1.712  
1.699

0.836  
0.823  
0.788  
0.774

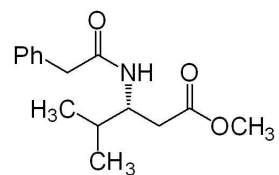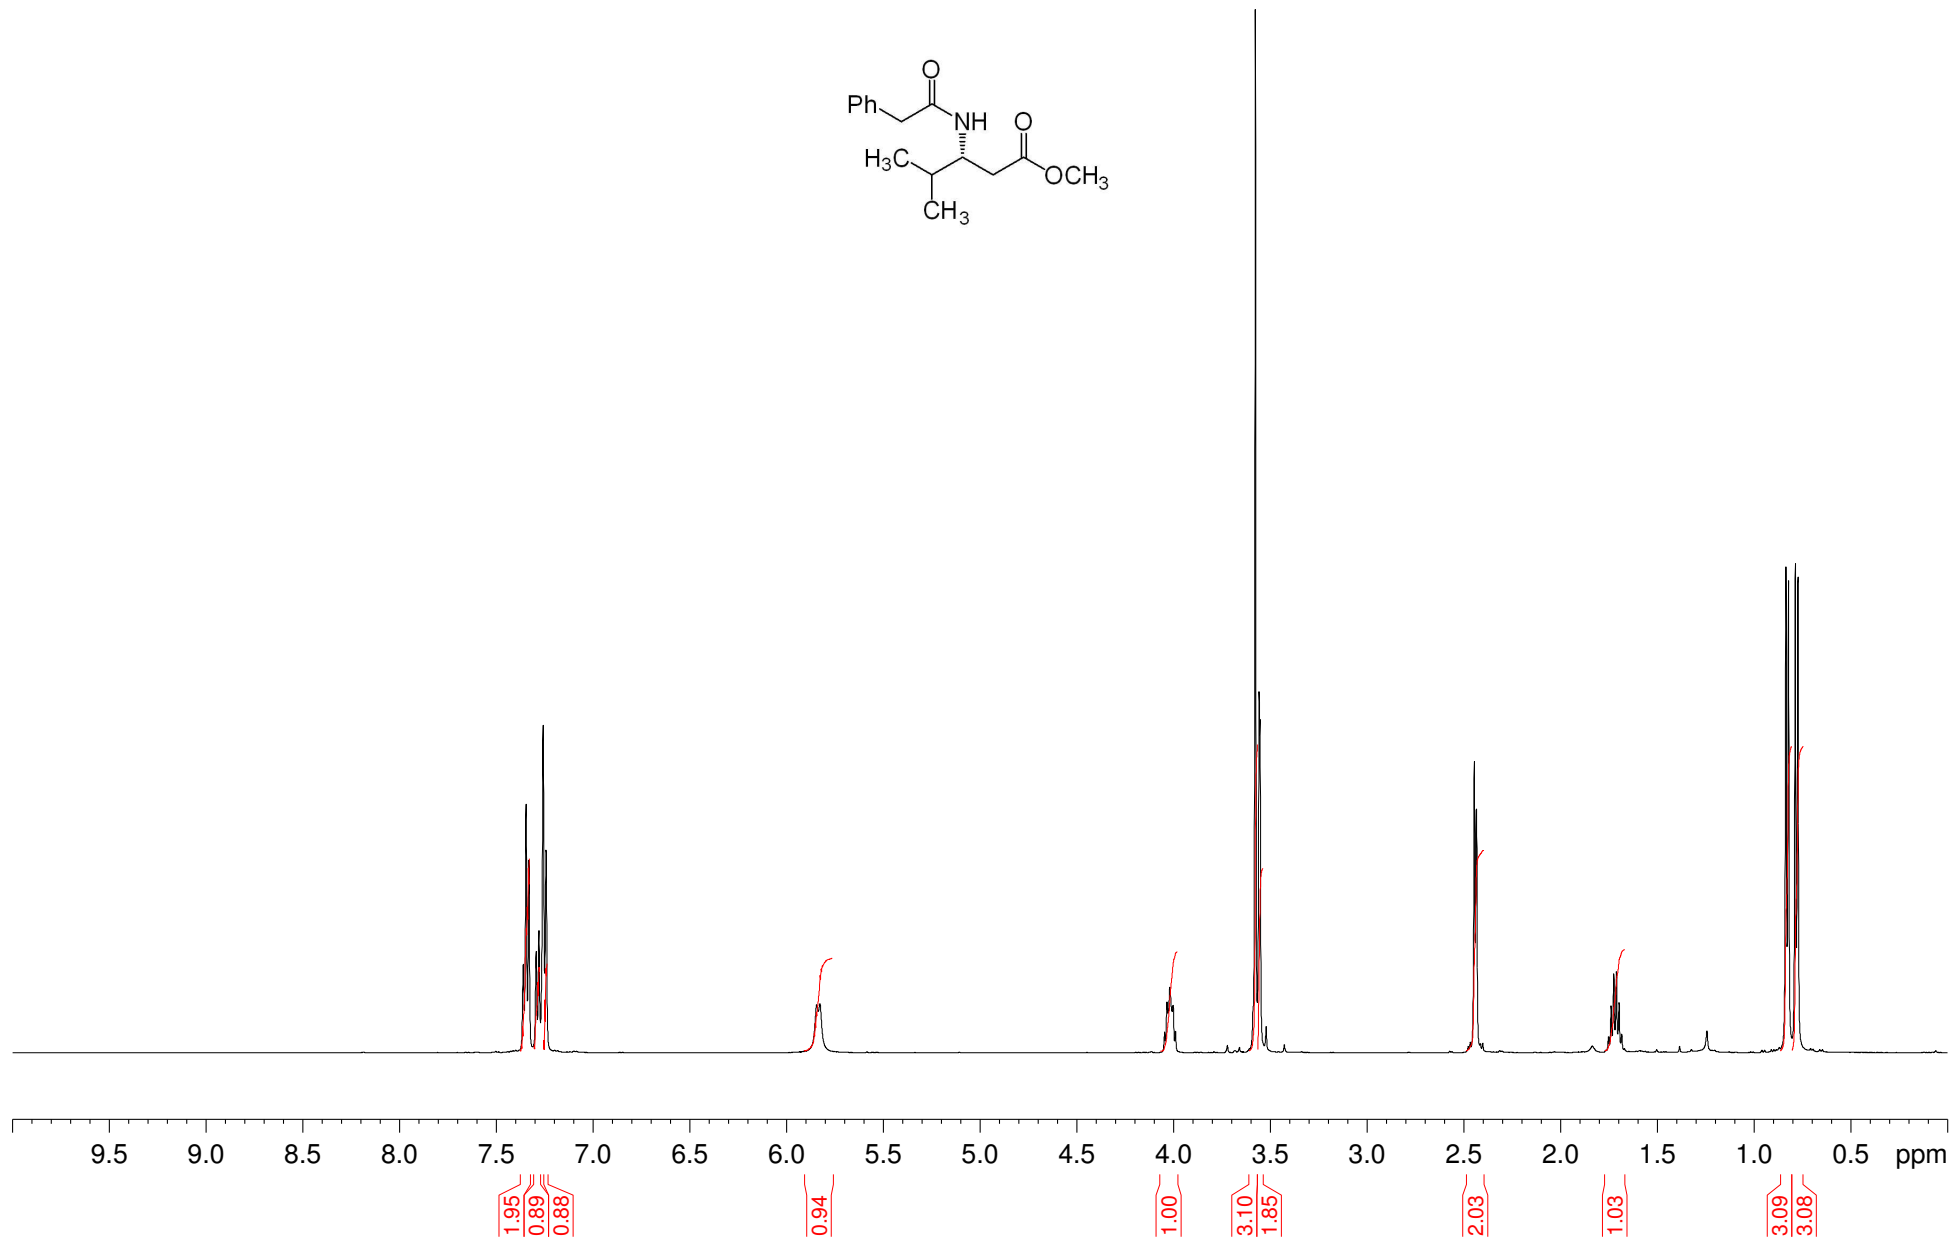

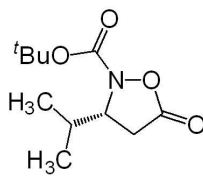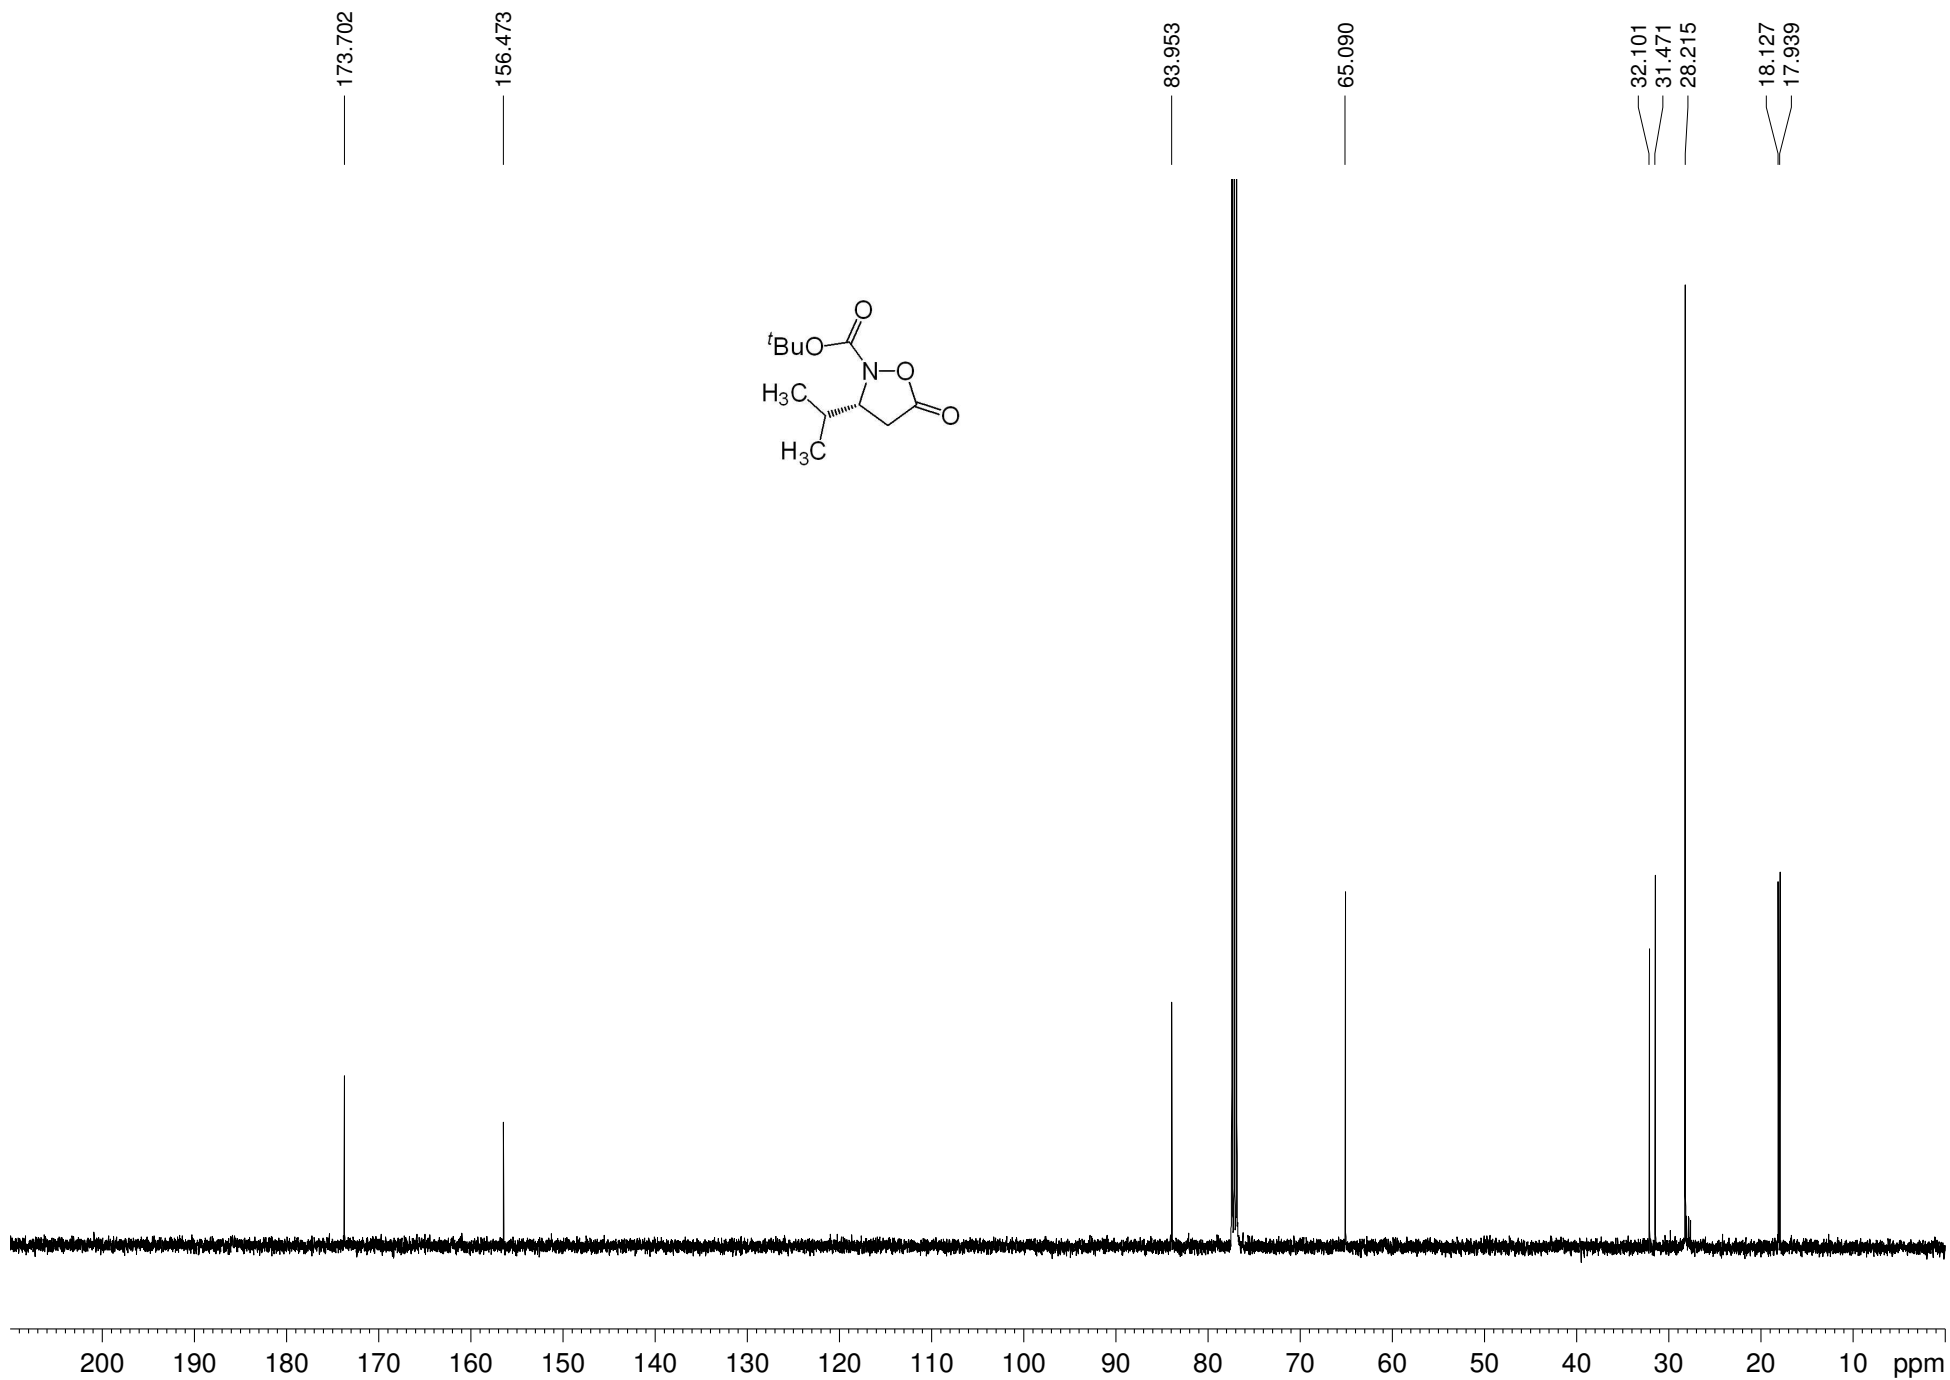

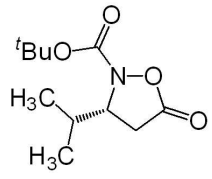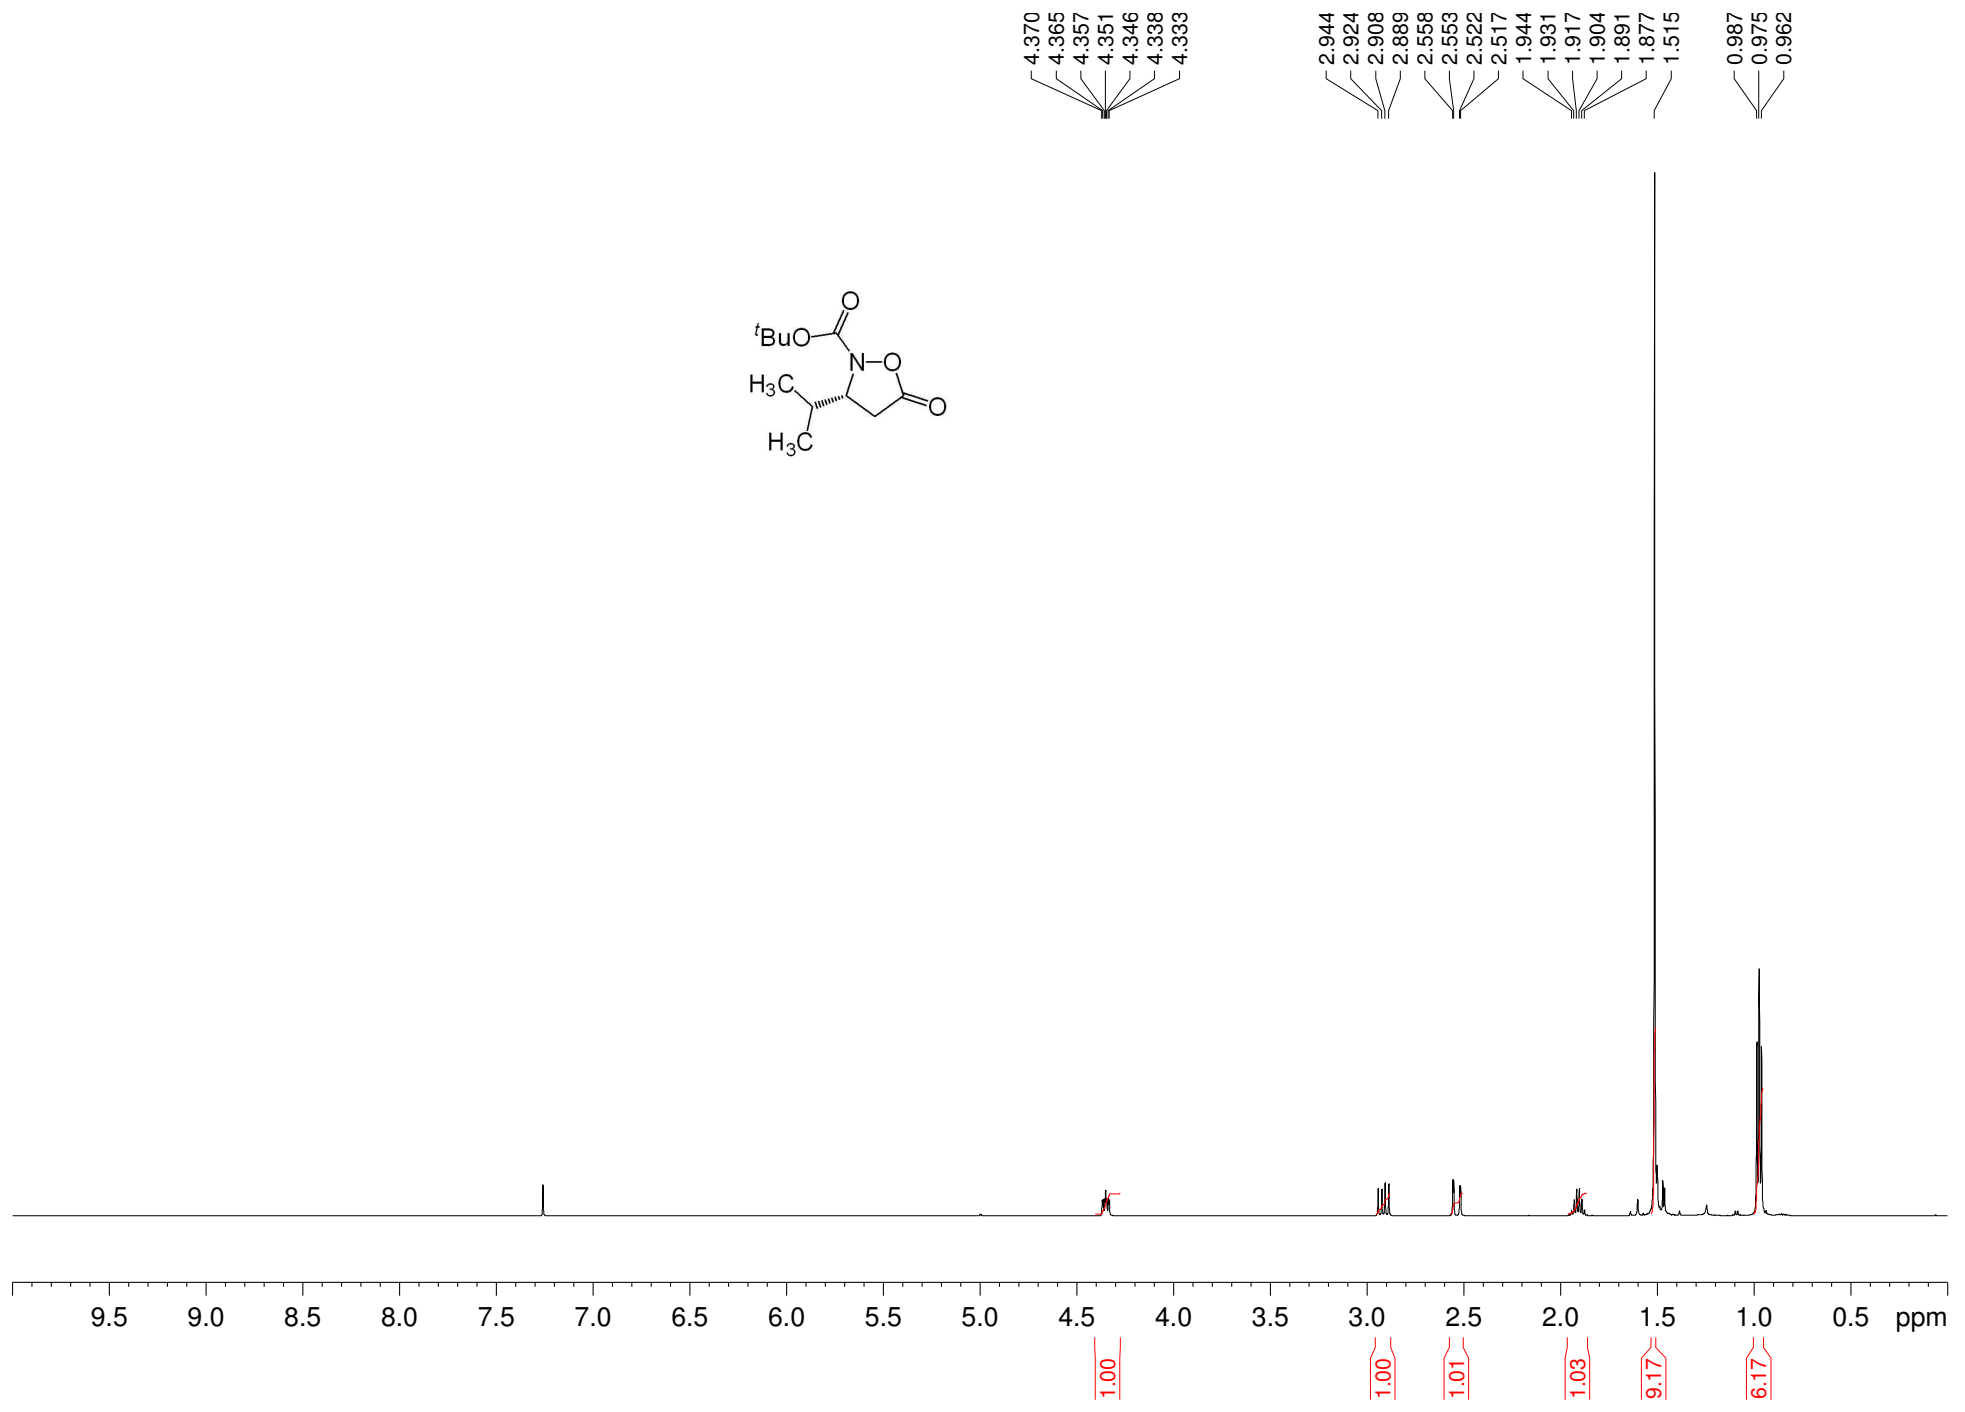

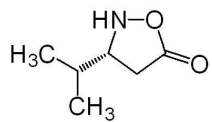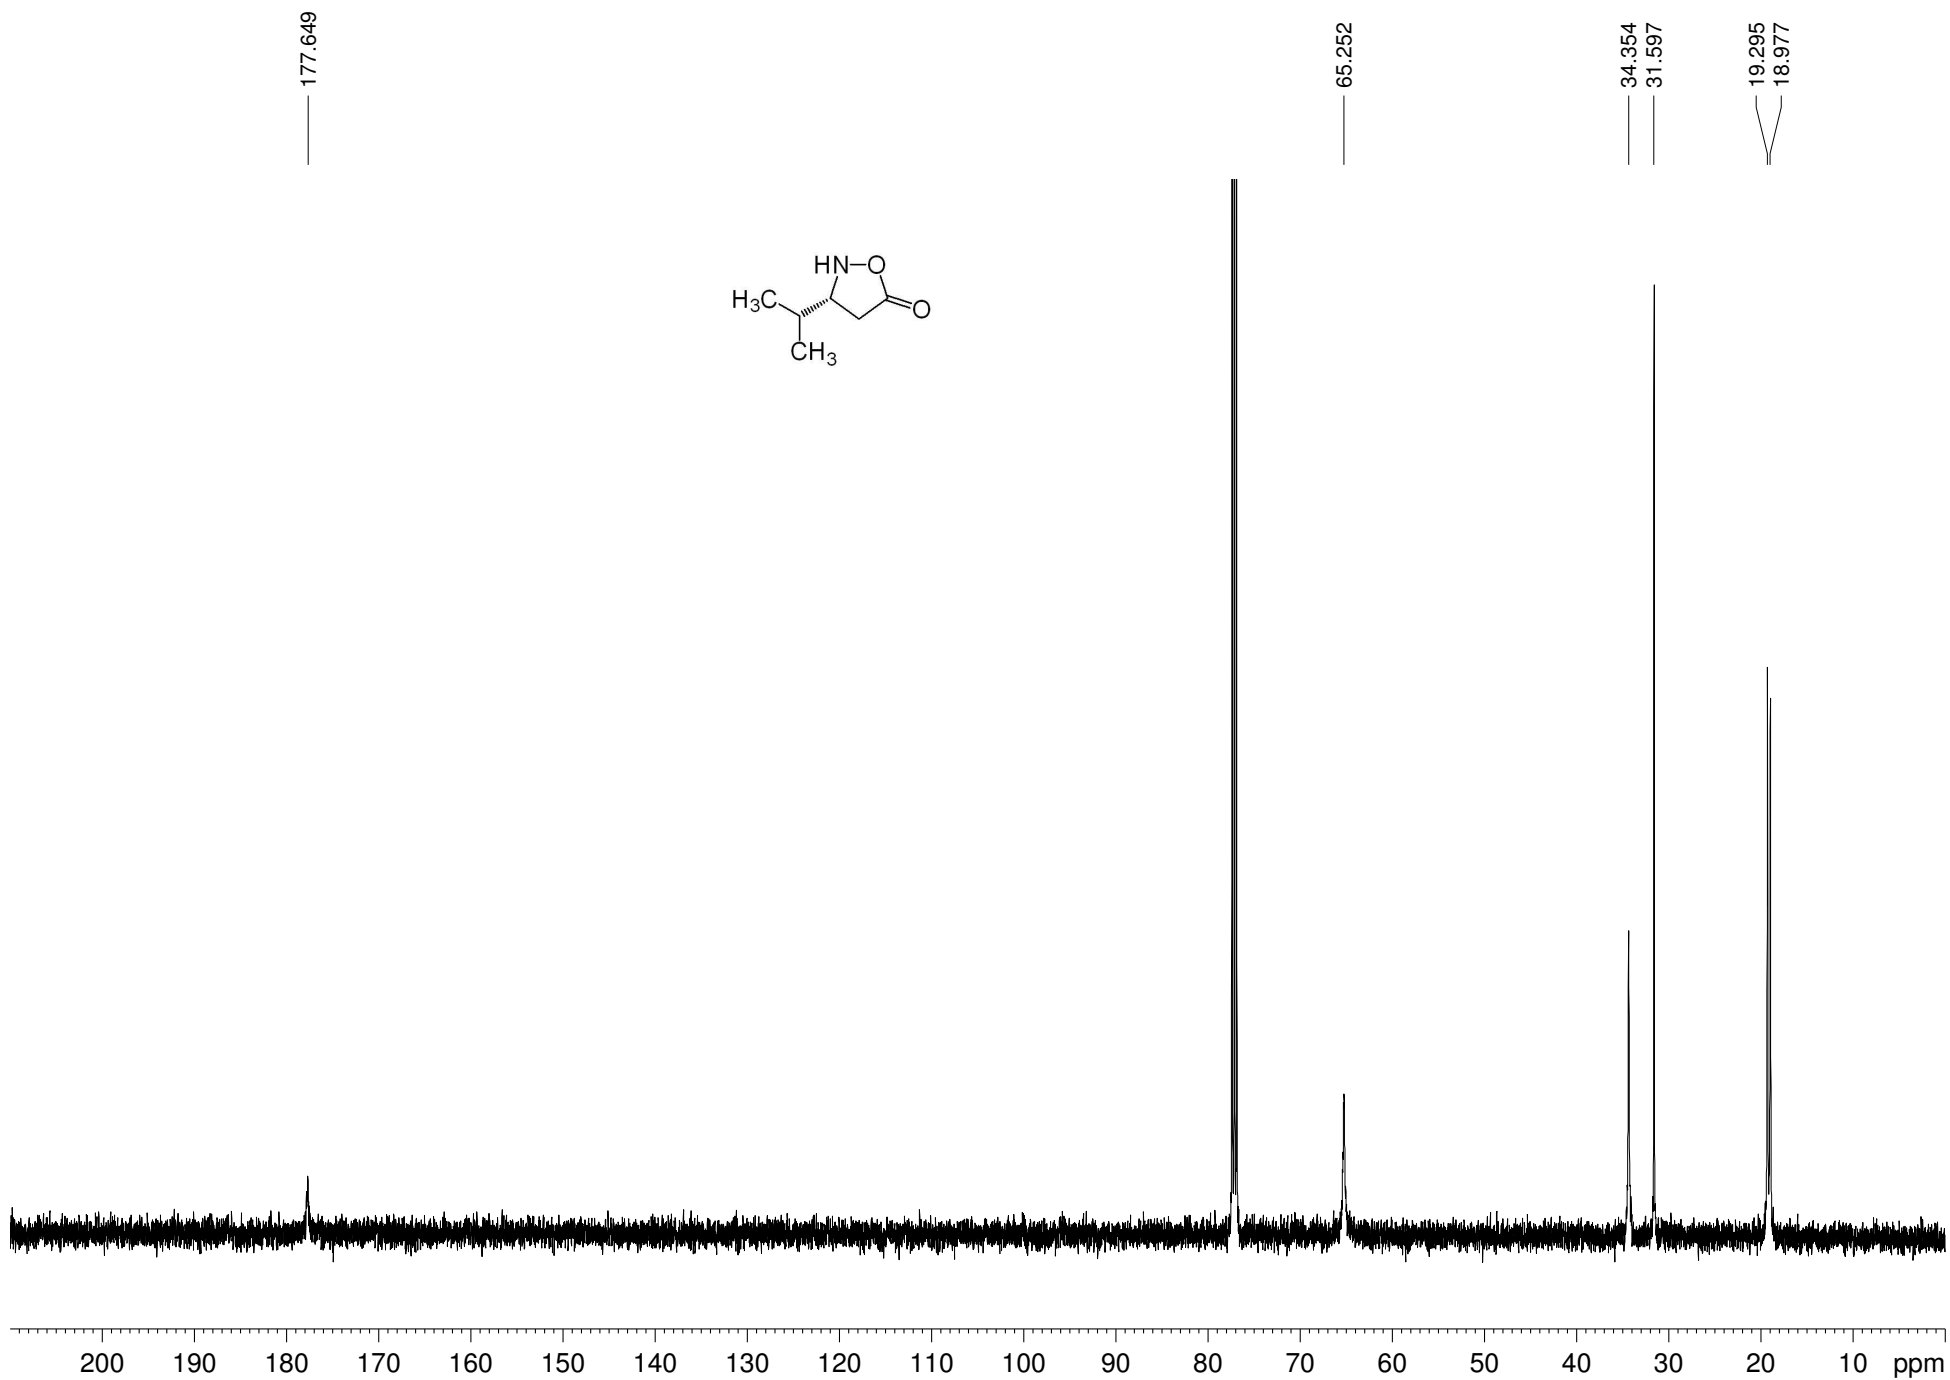

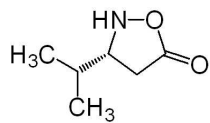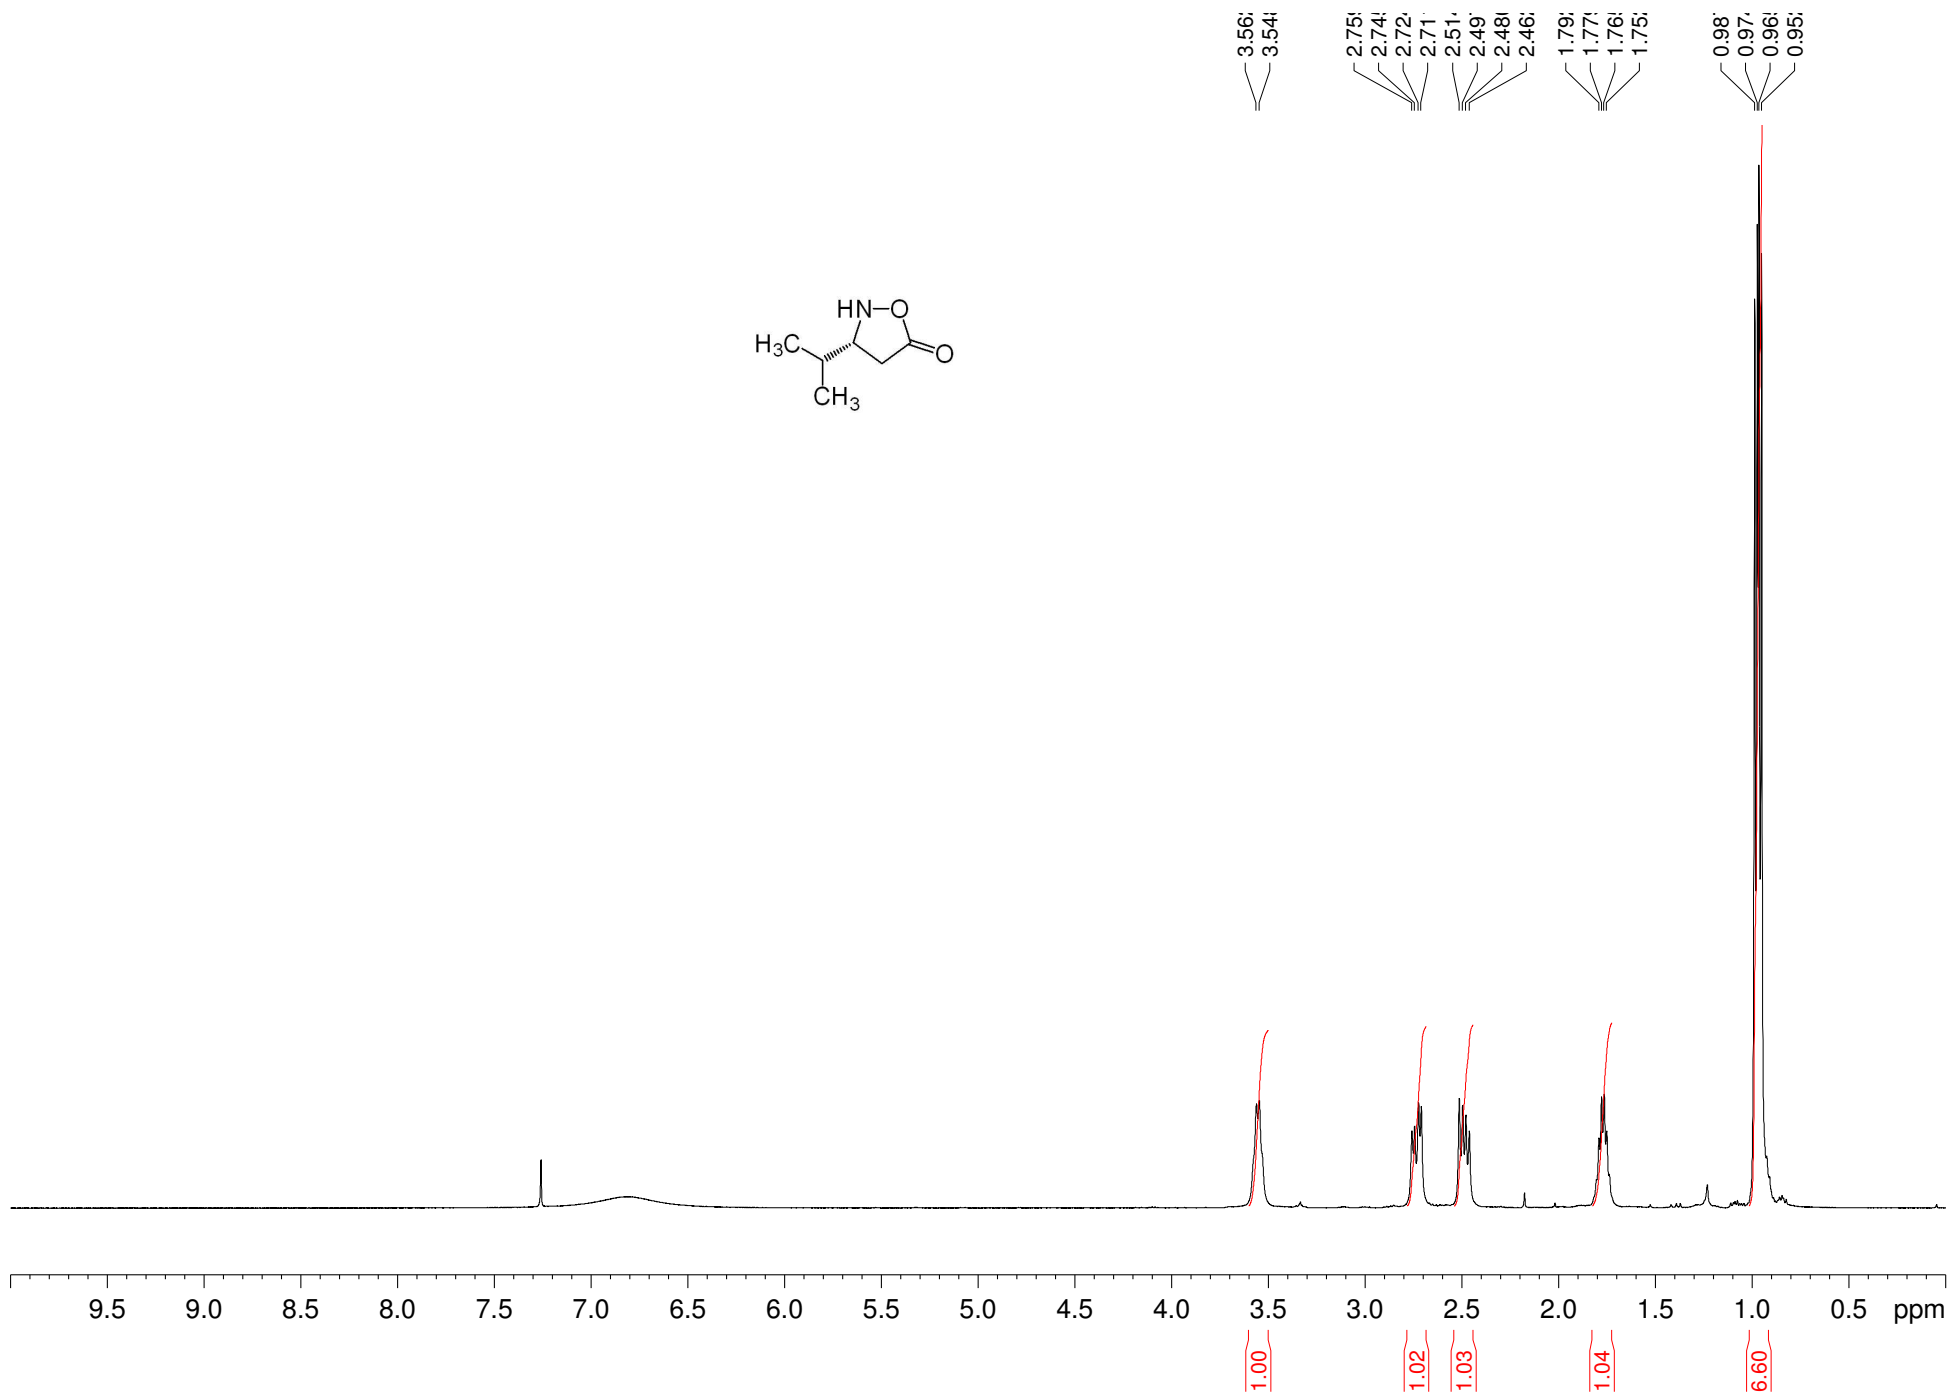



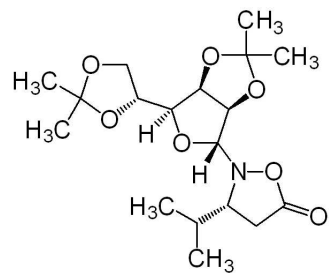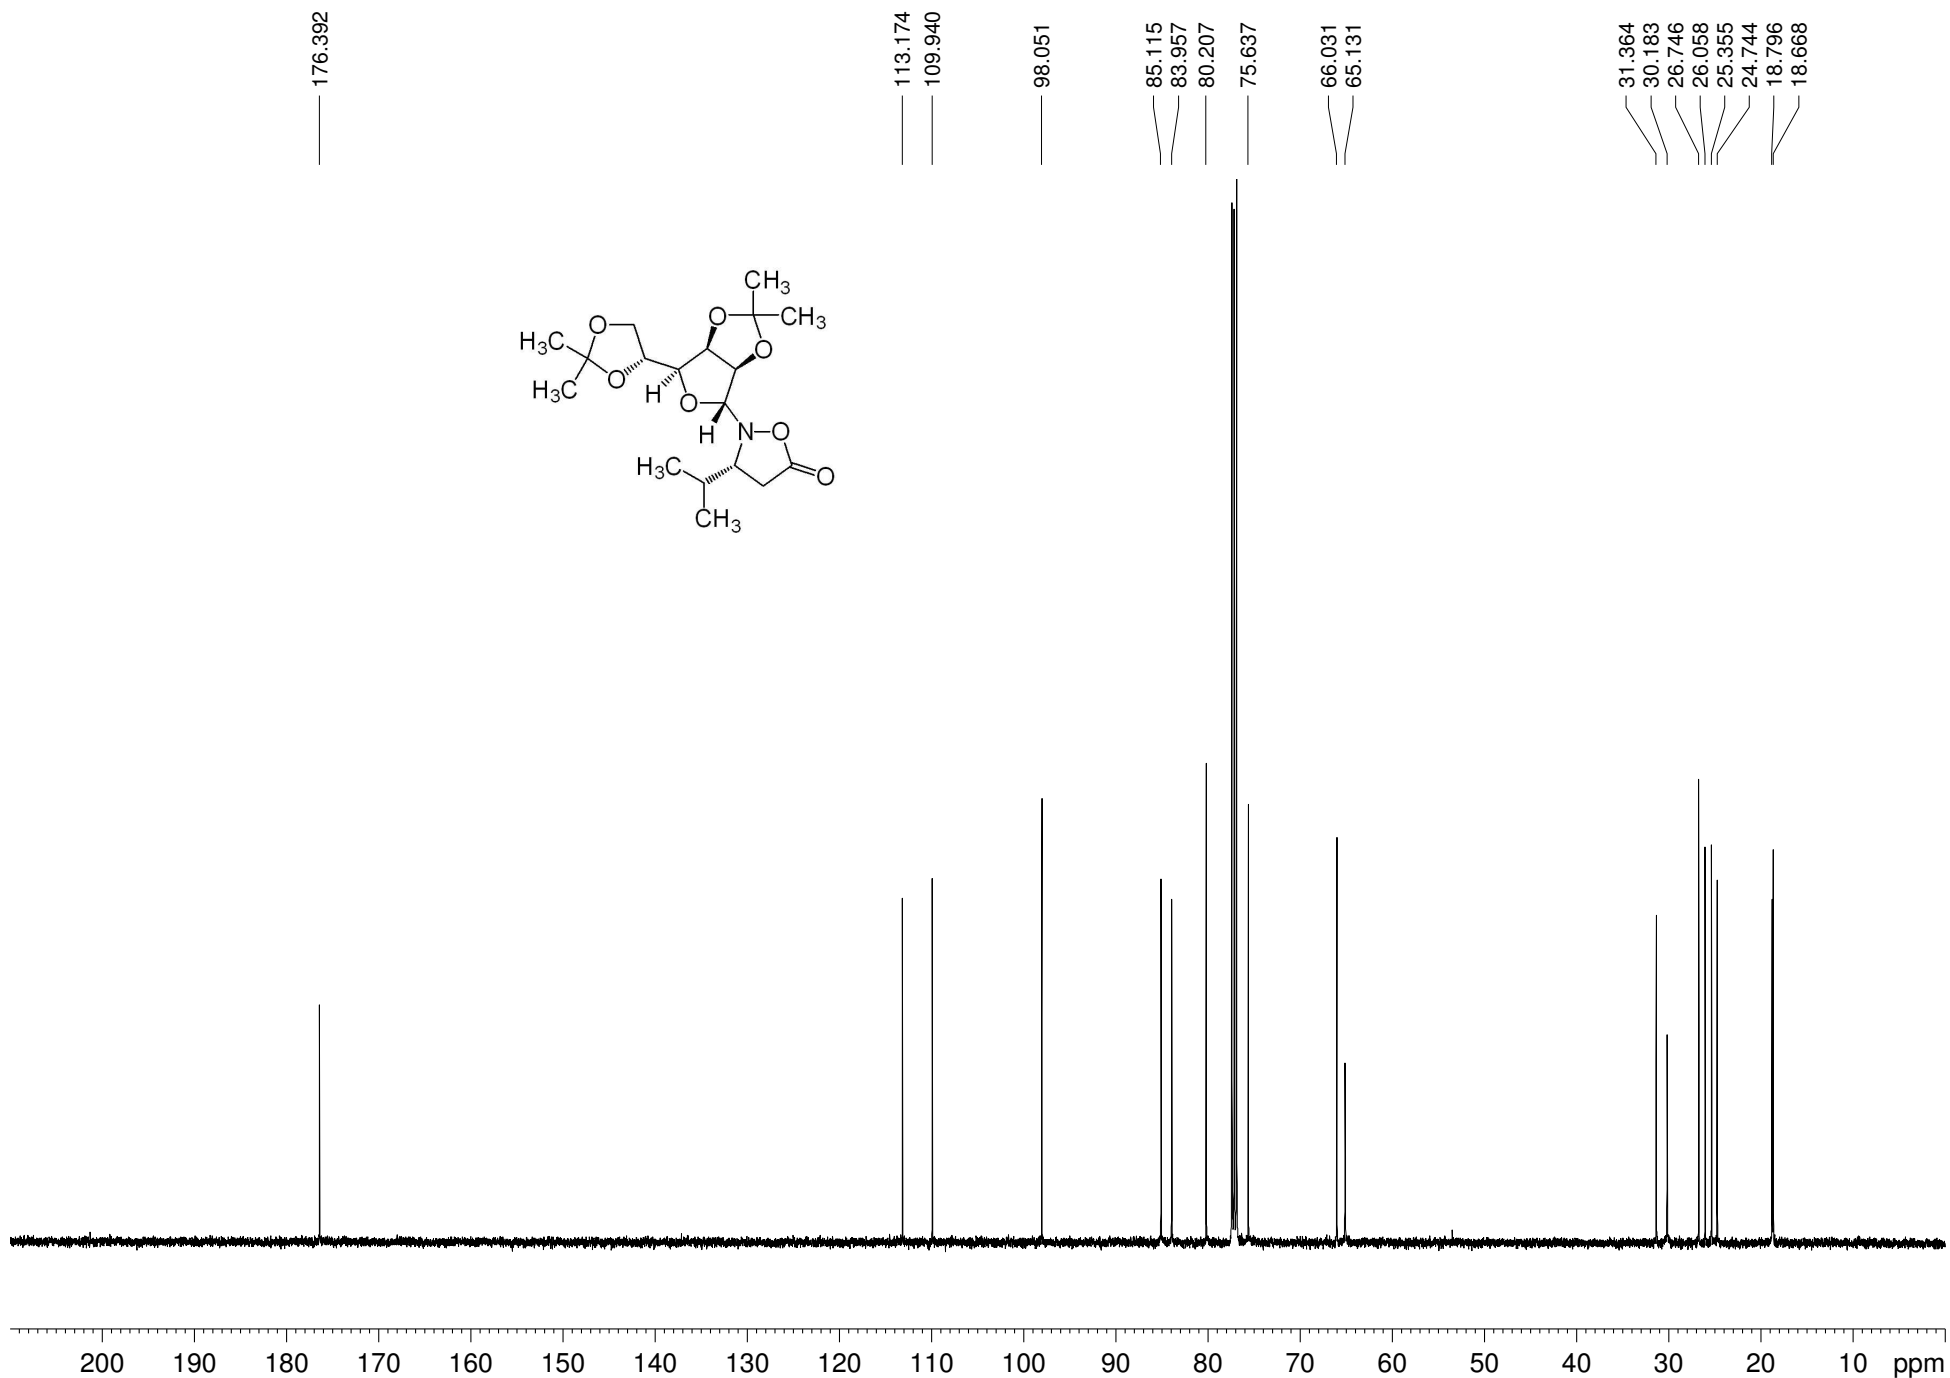

4.903  
4.891  
4.730  
4.722  
4.719  
4.710  
4.648  
4.373  
4.360  
4.343  
4.330  
4.209  
4.192  
4.178  
4.063  
4.055  
4.046  
4.038  
3.752  
3.739  
3.735  
3.722  
3.649  
3.641  
3.631  
3.627  
3.617  
3.610  
2.848  
2.830  
2.812  
2.794  
2.510  
2.502  
2.474  
2.466  
1.855  
1.841  
1.828  
1.814  
1.801  
1.443  
1.398  
1.366  
1.282  
0.957  
0.942  
0.928

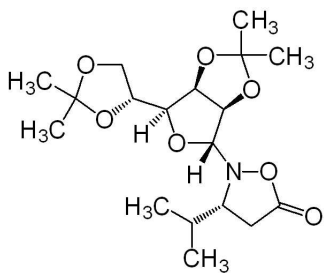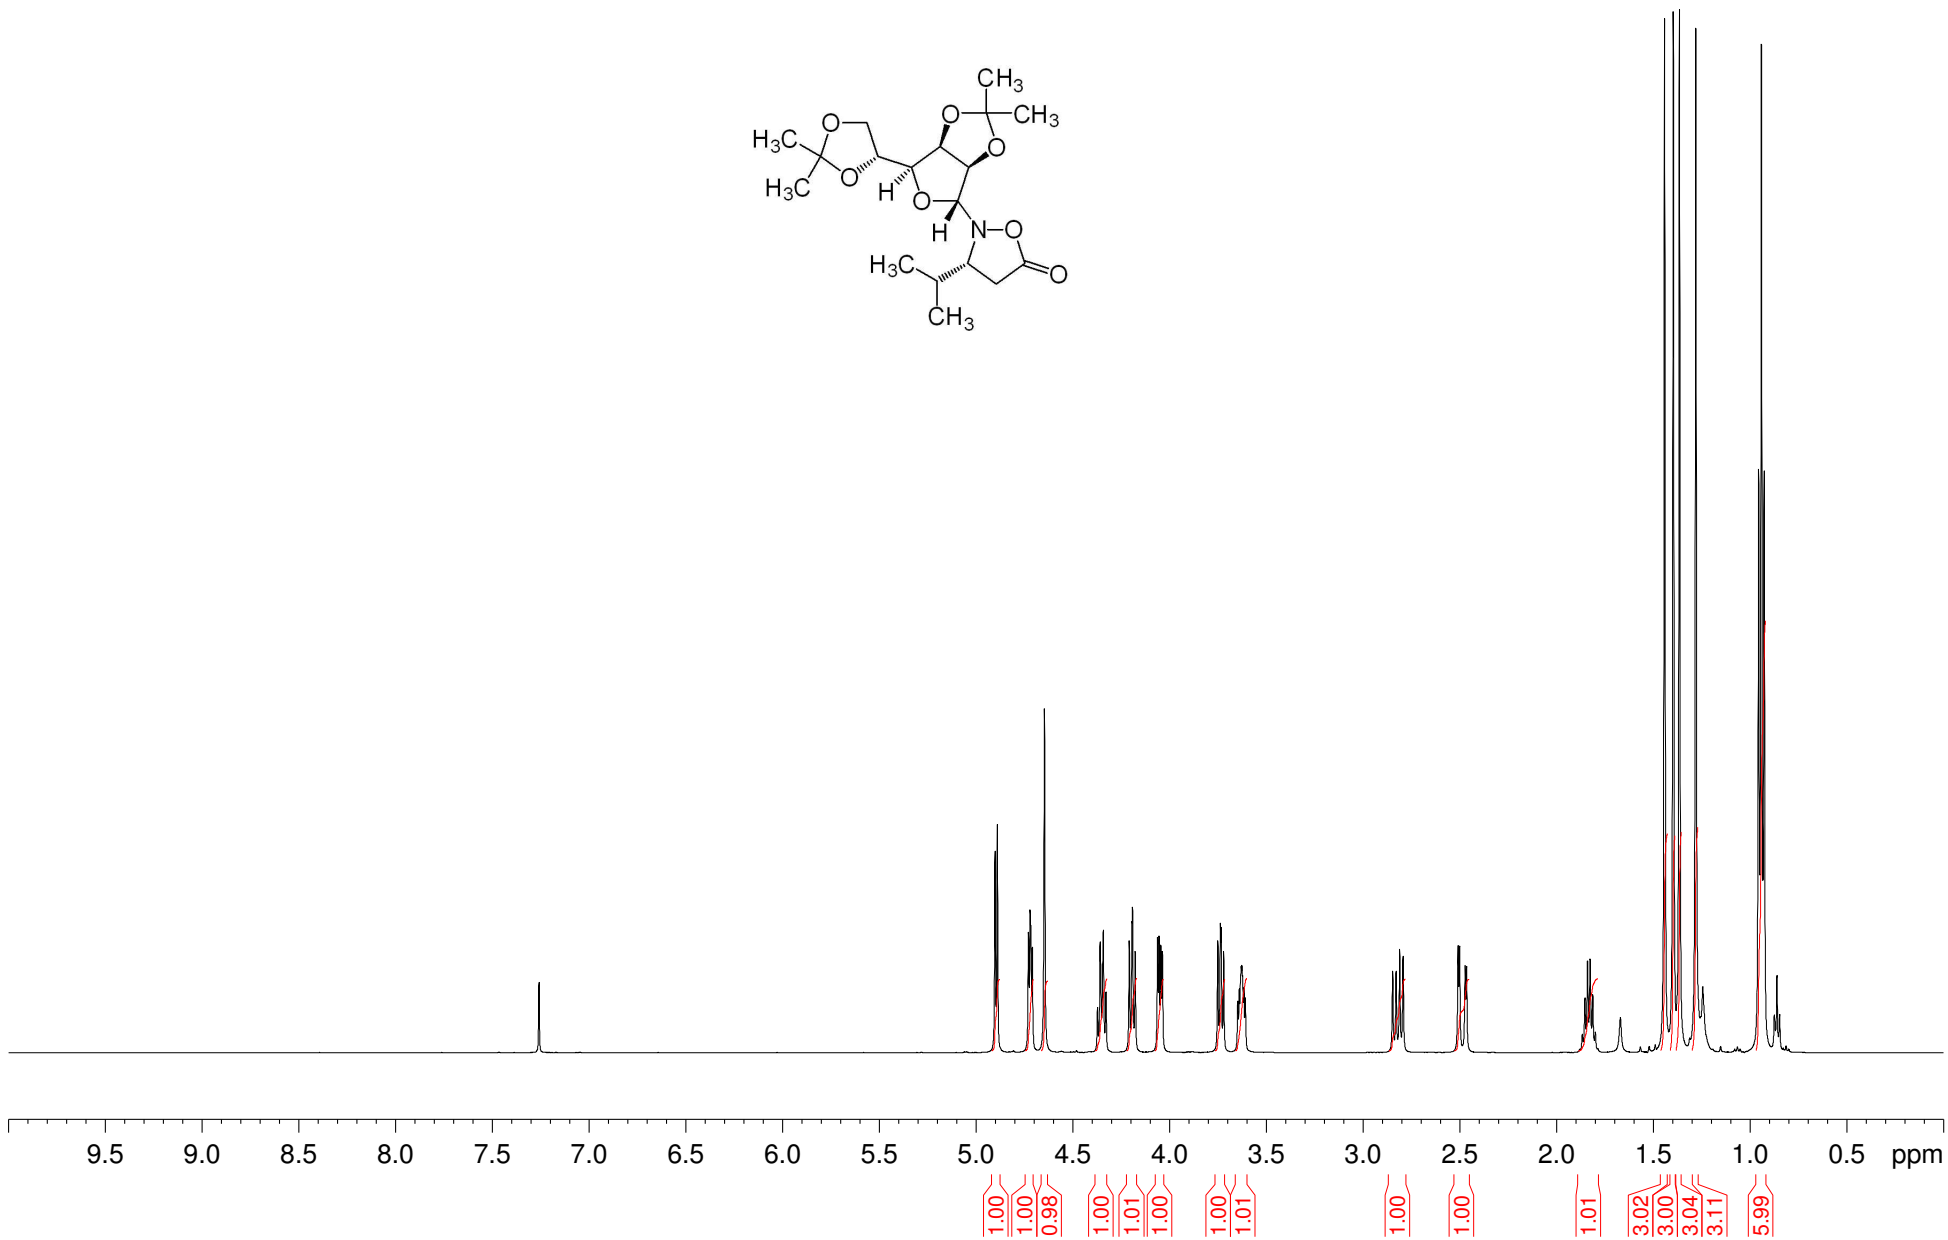



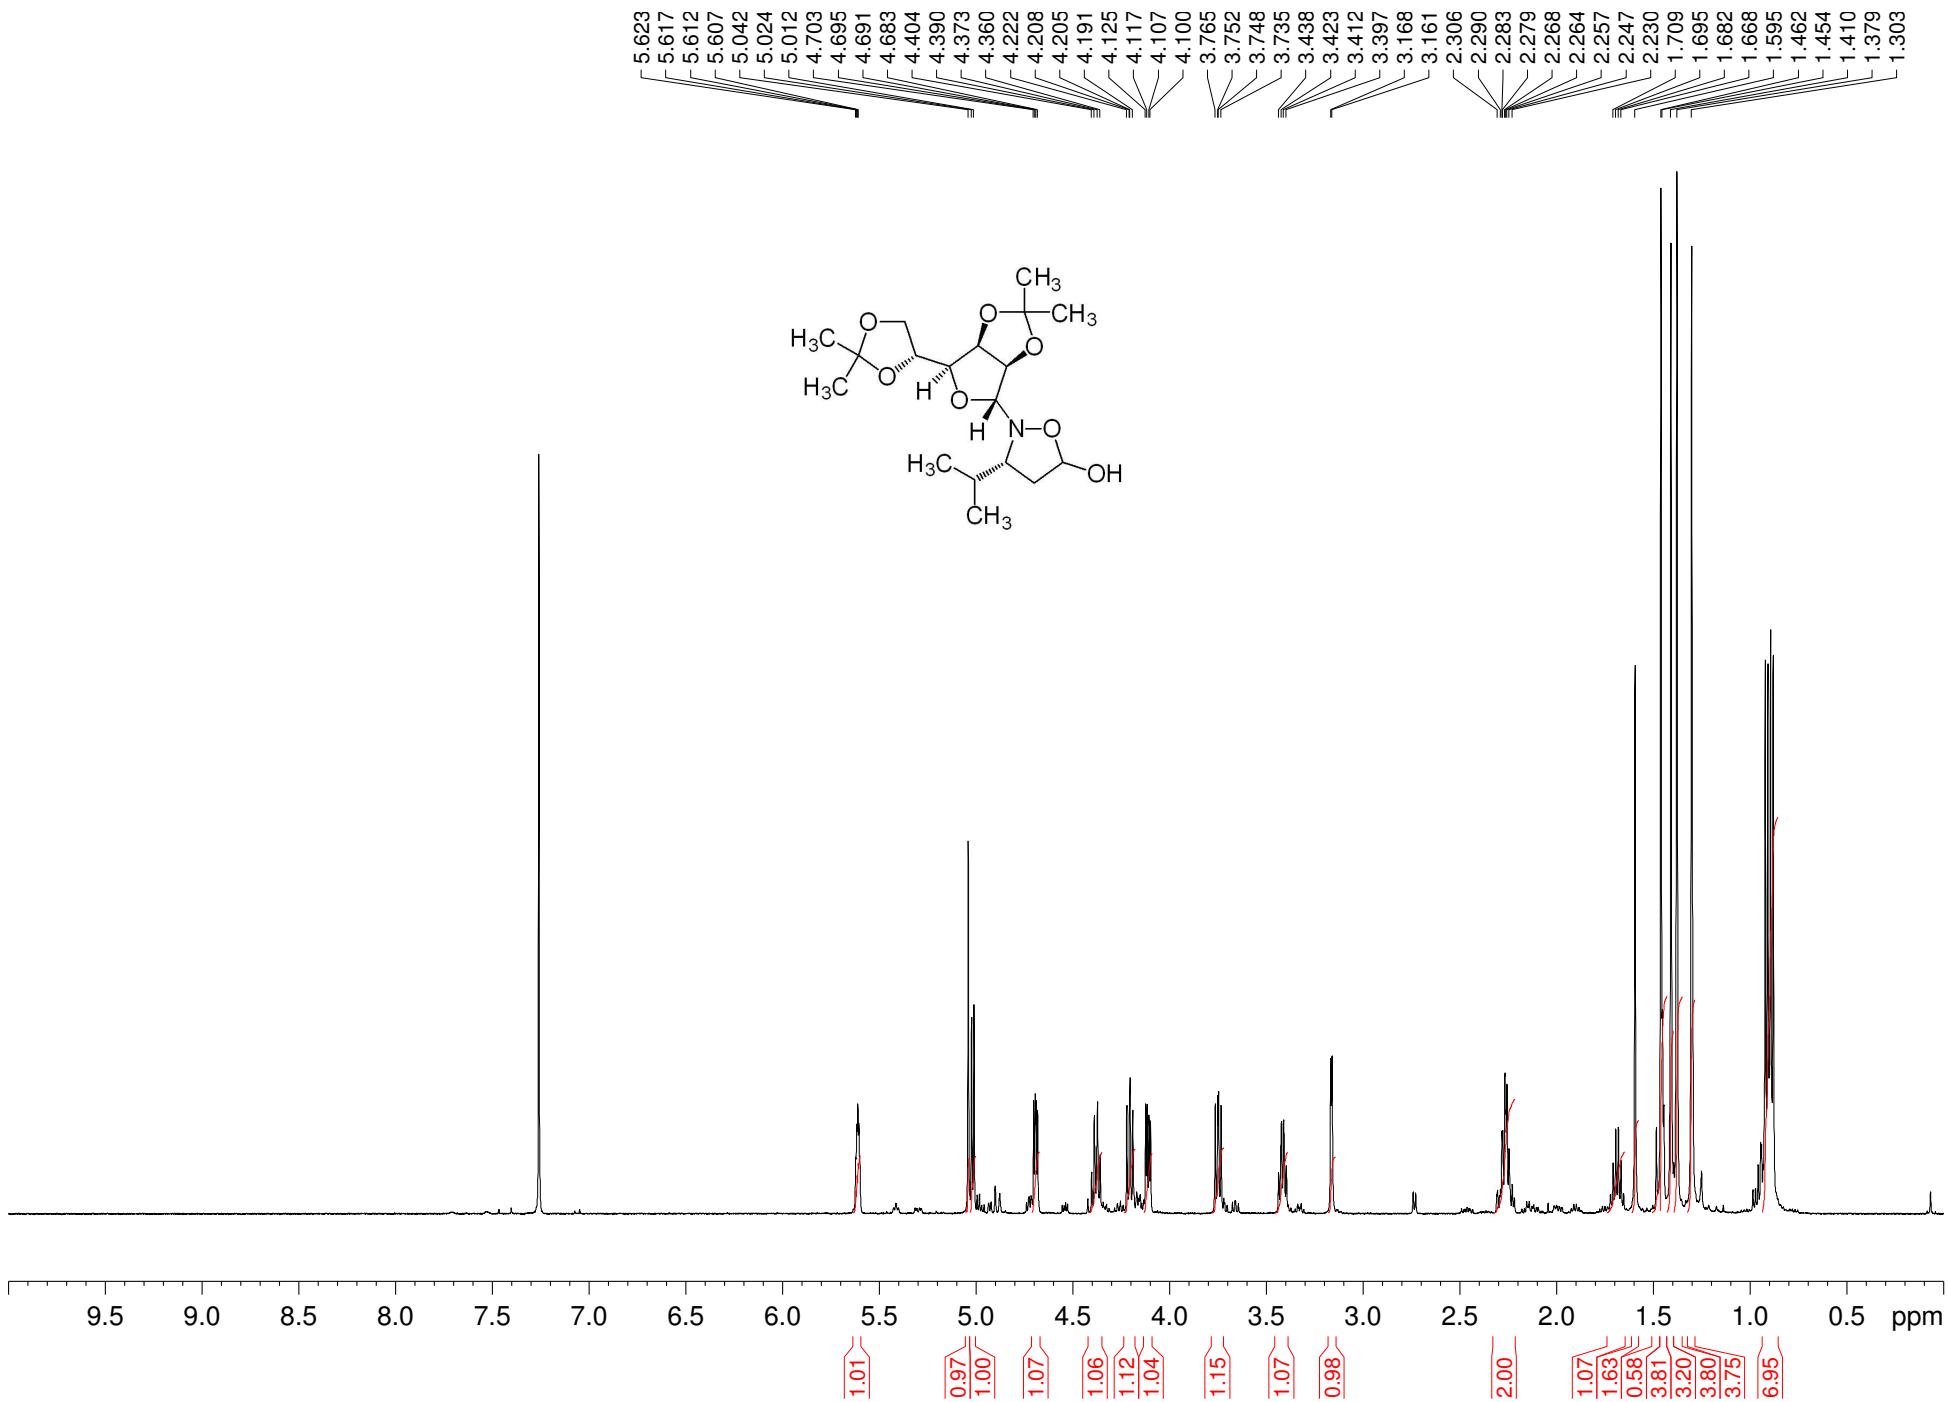

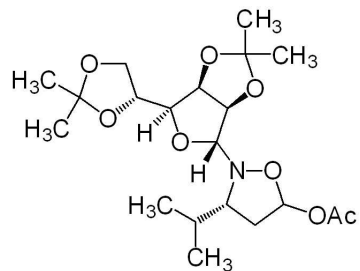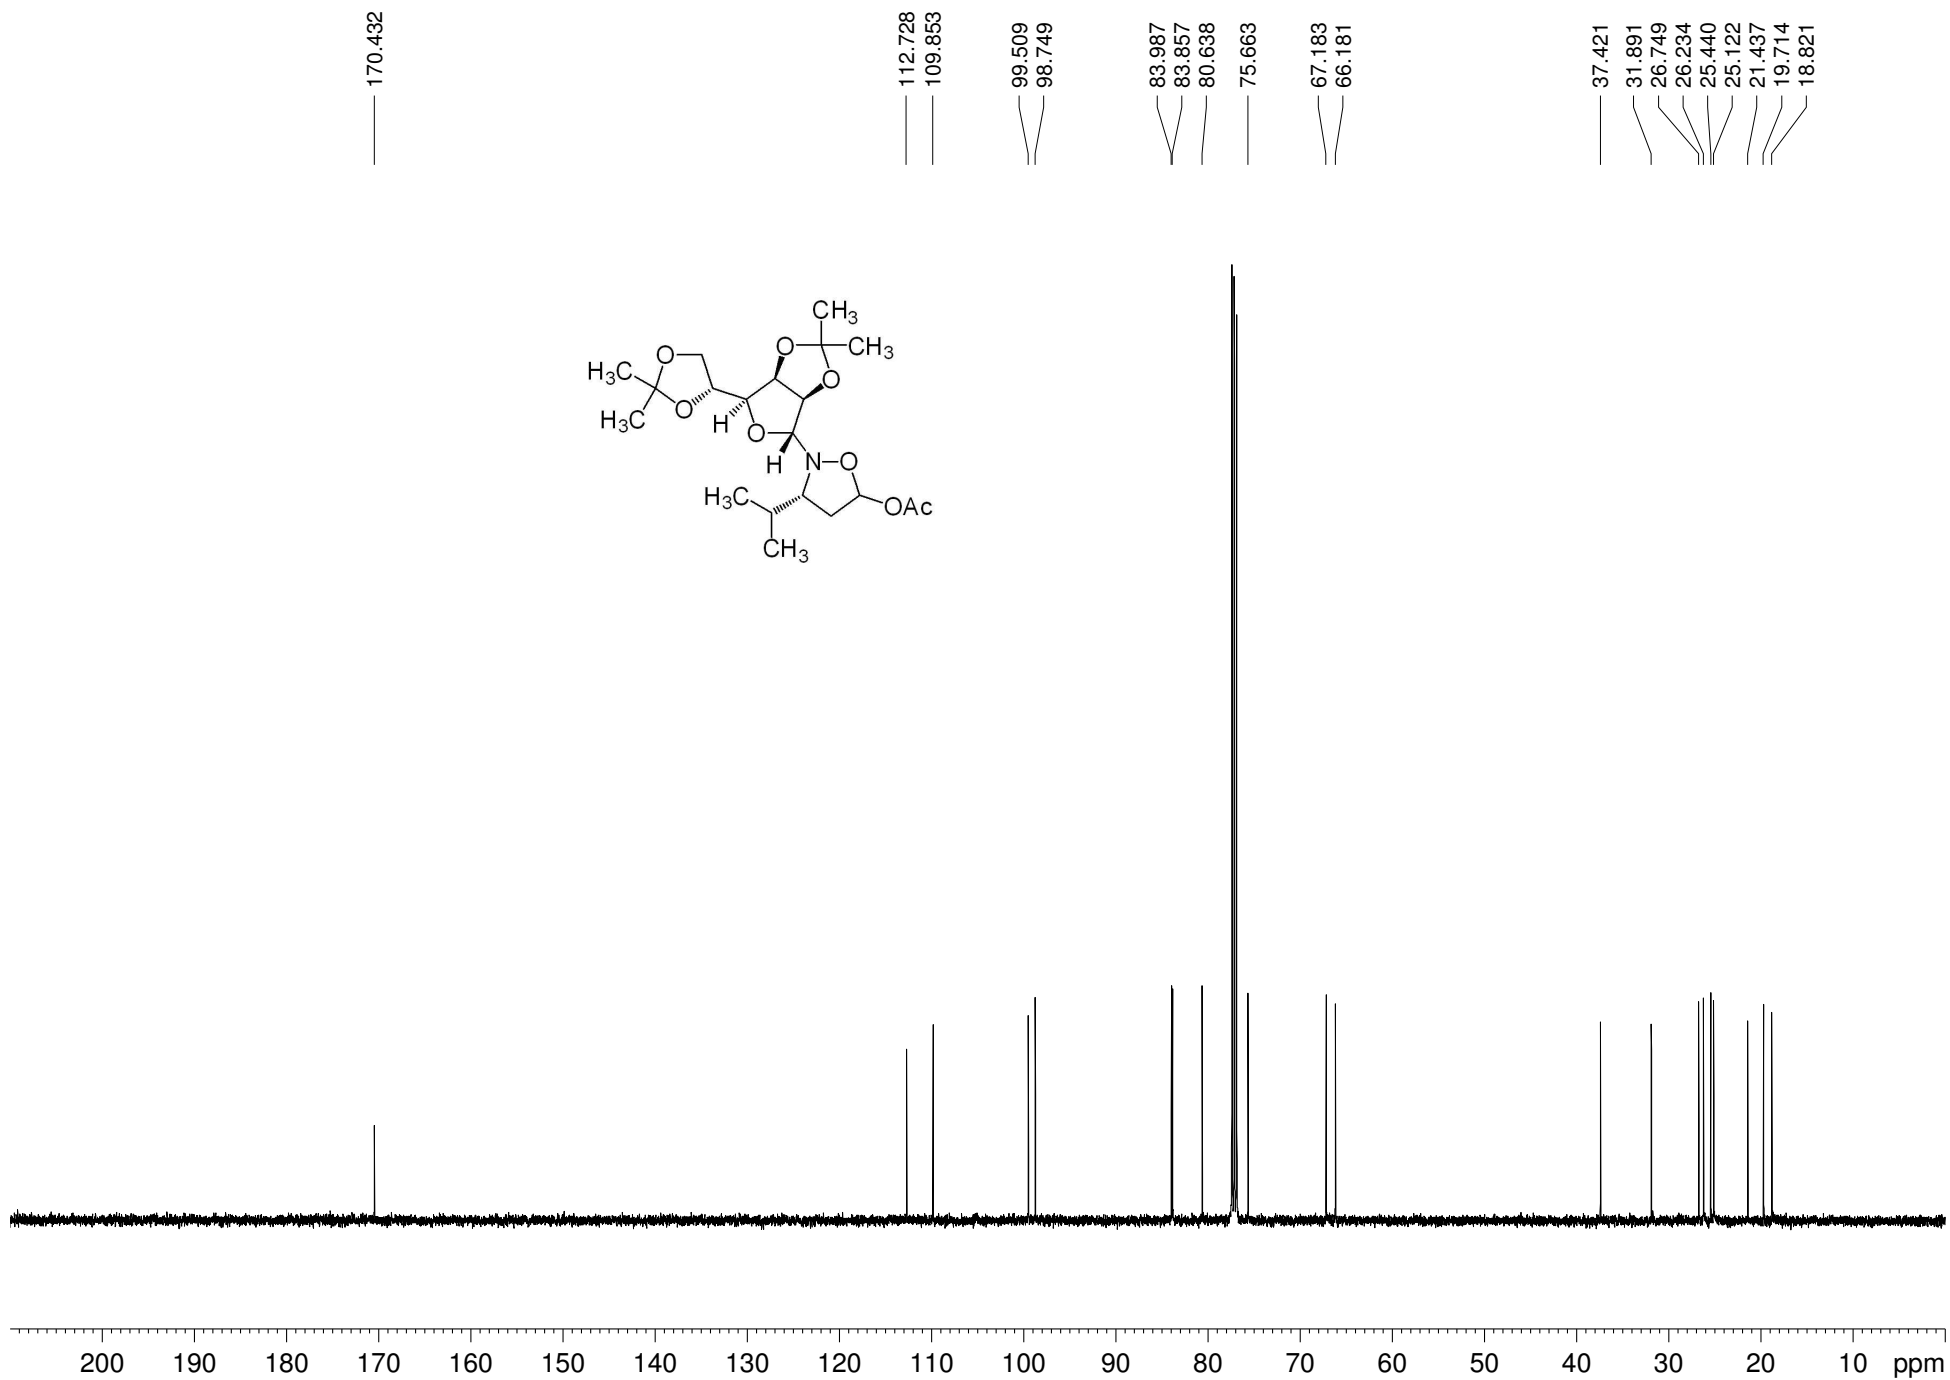

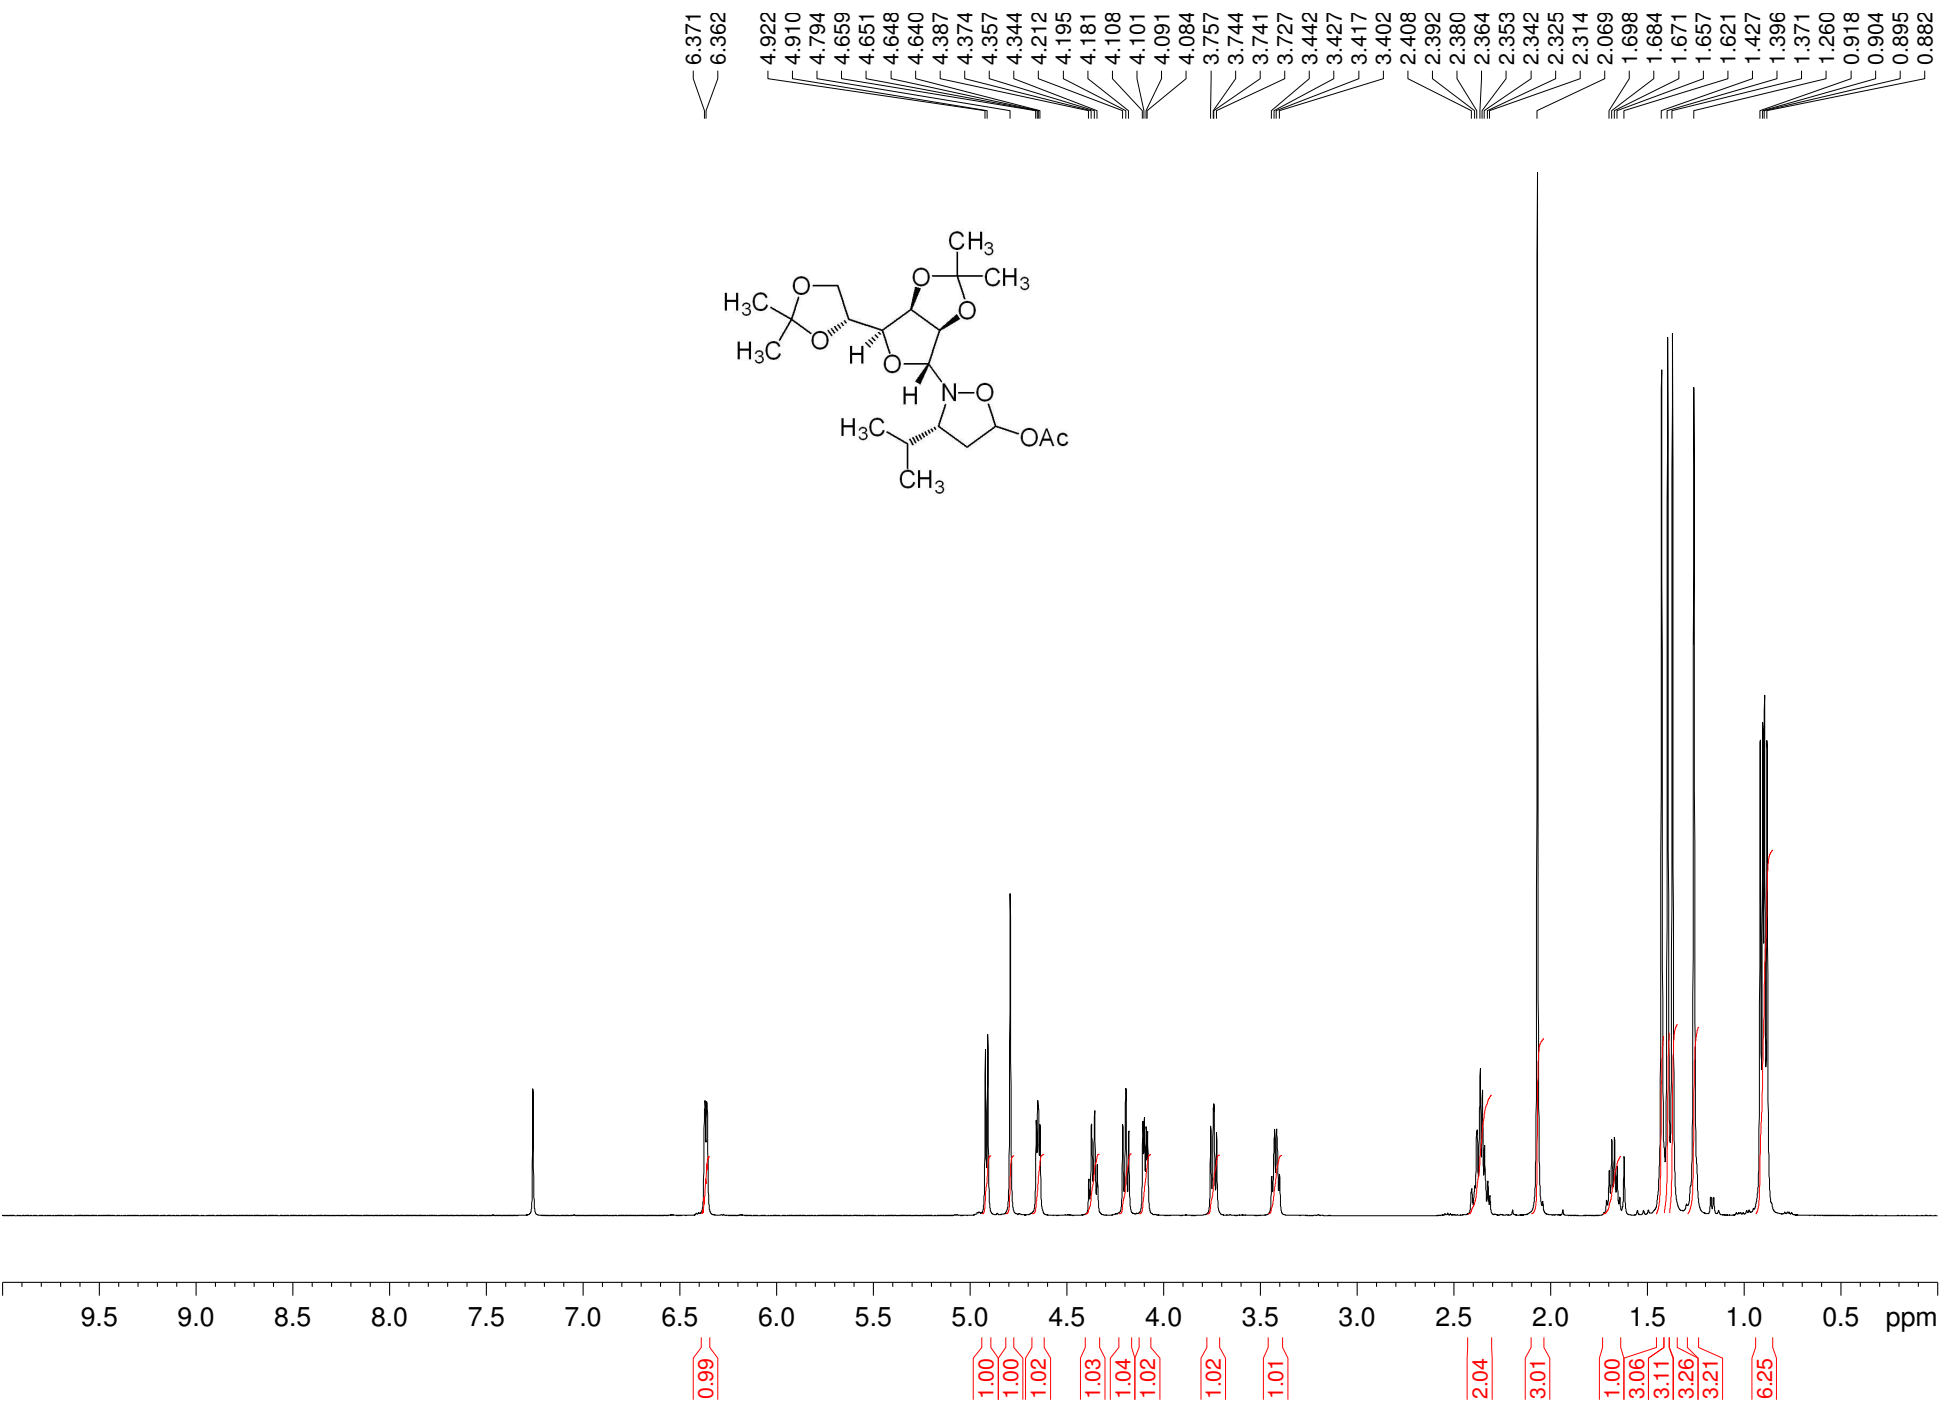

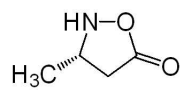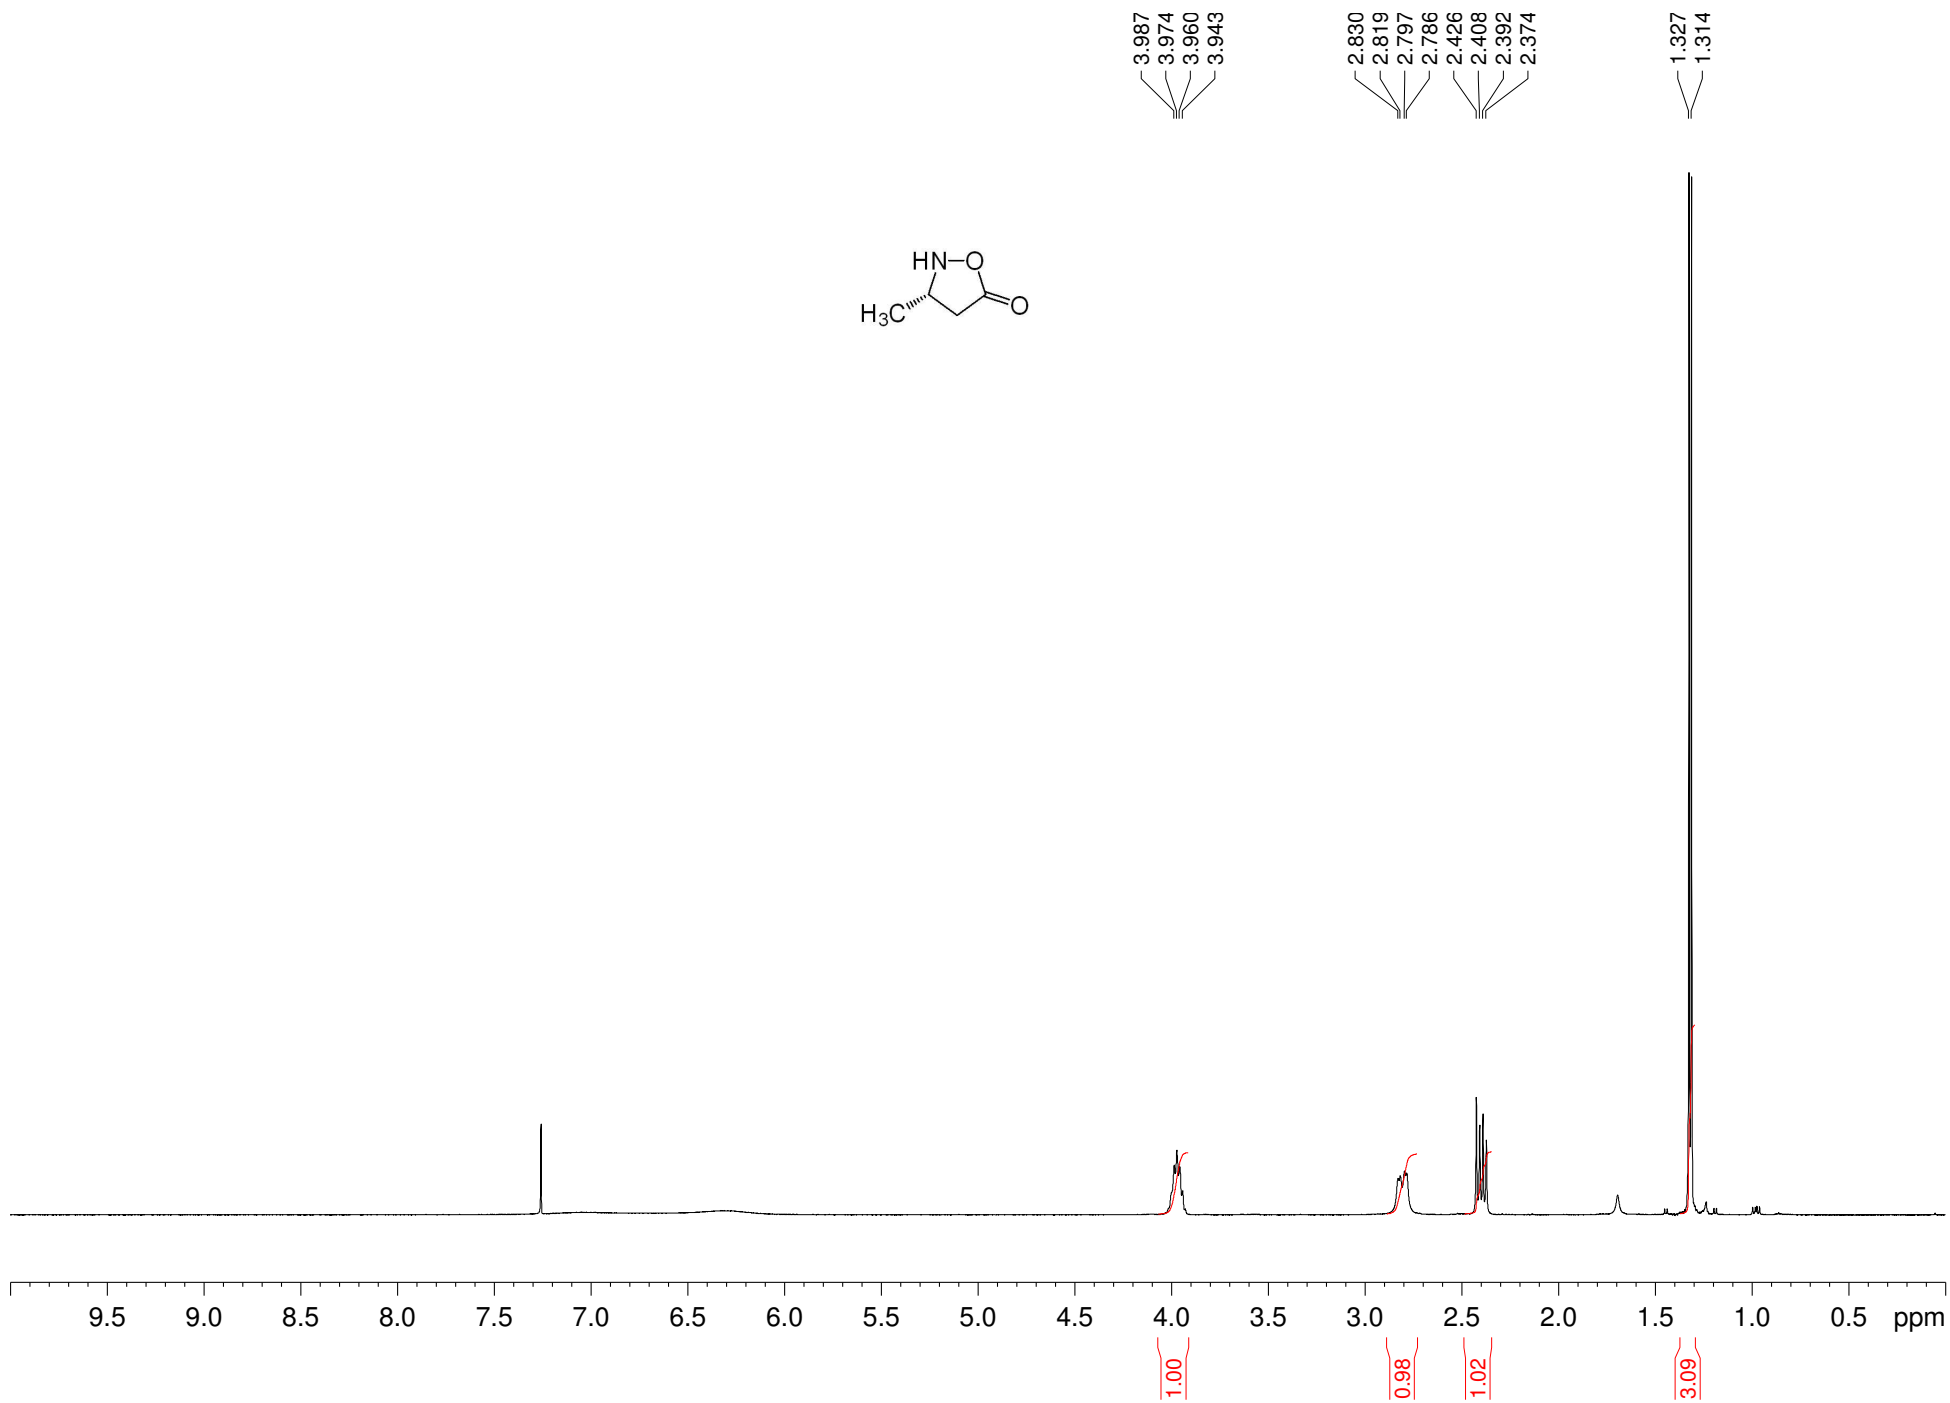

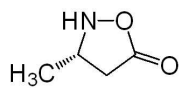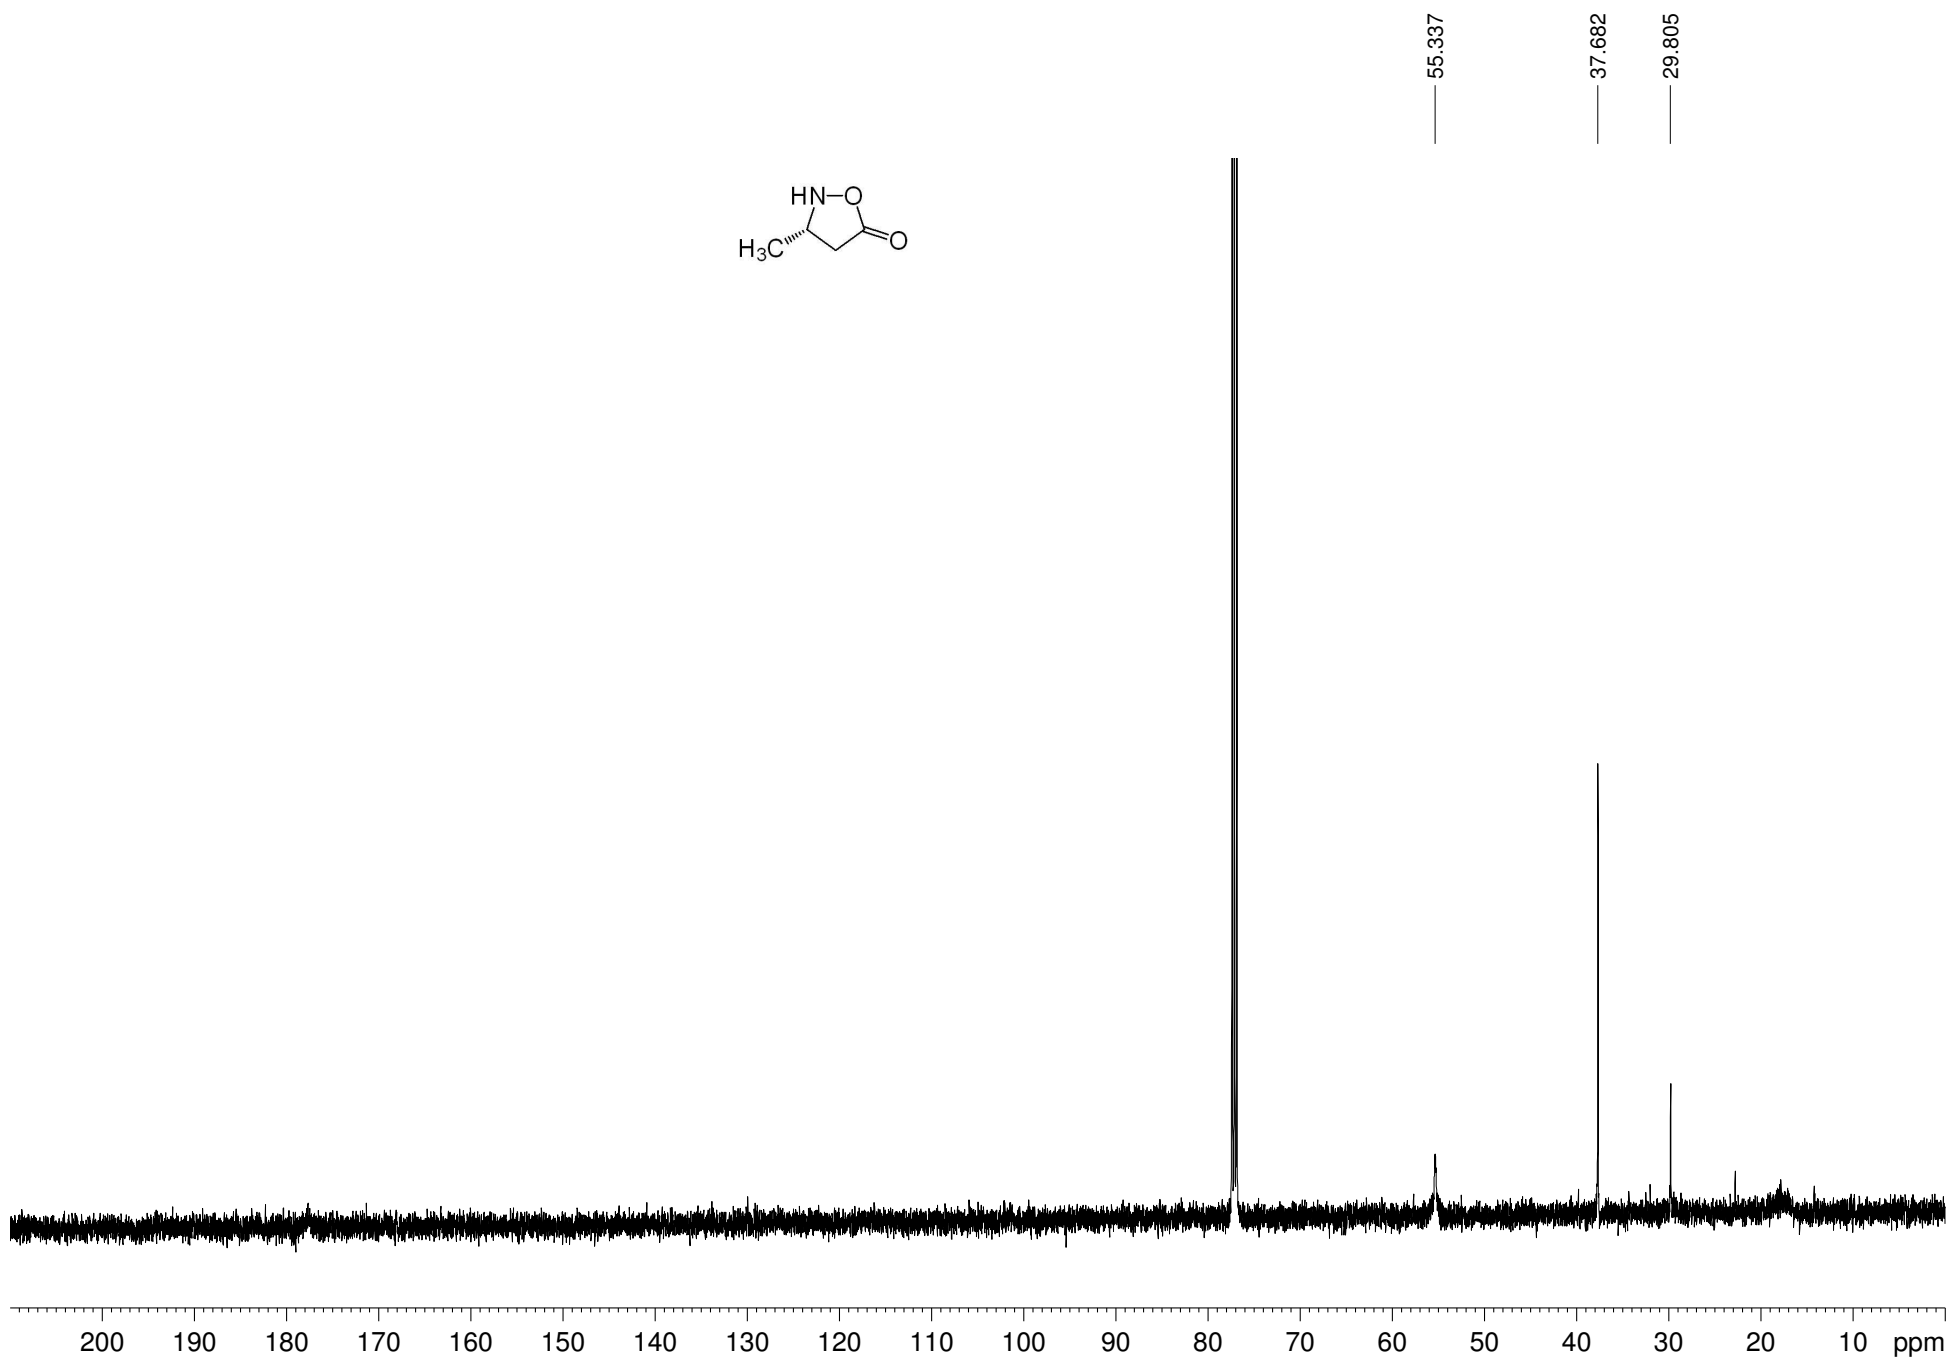



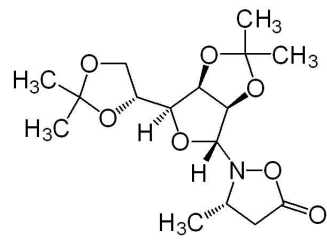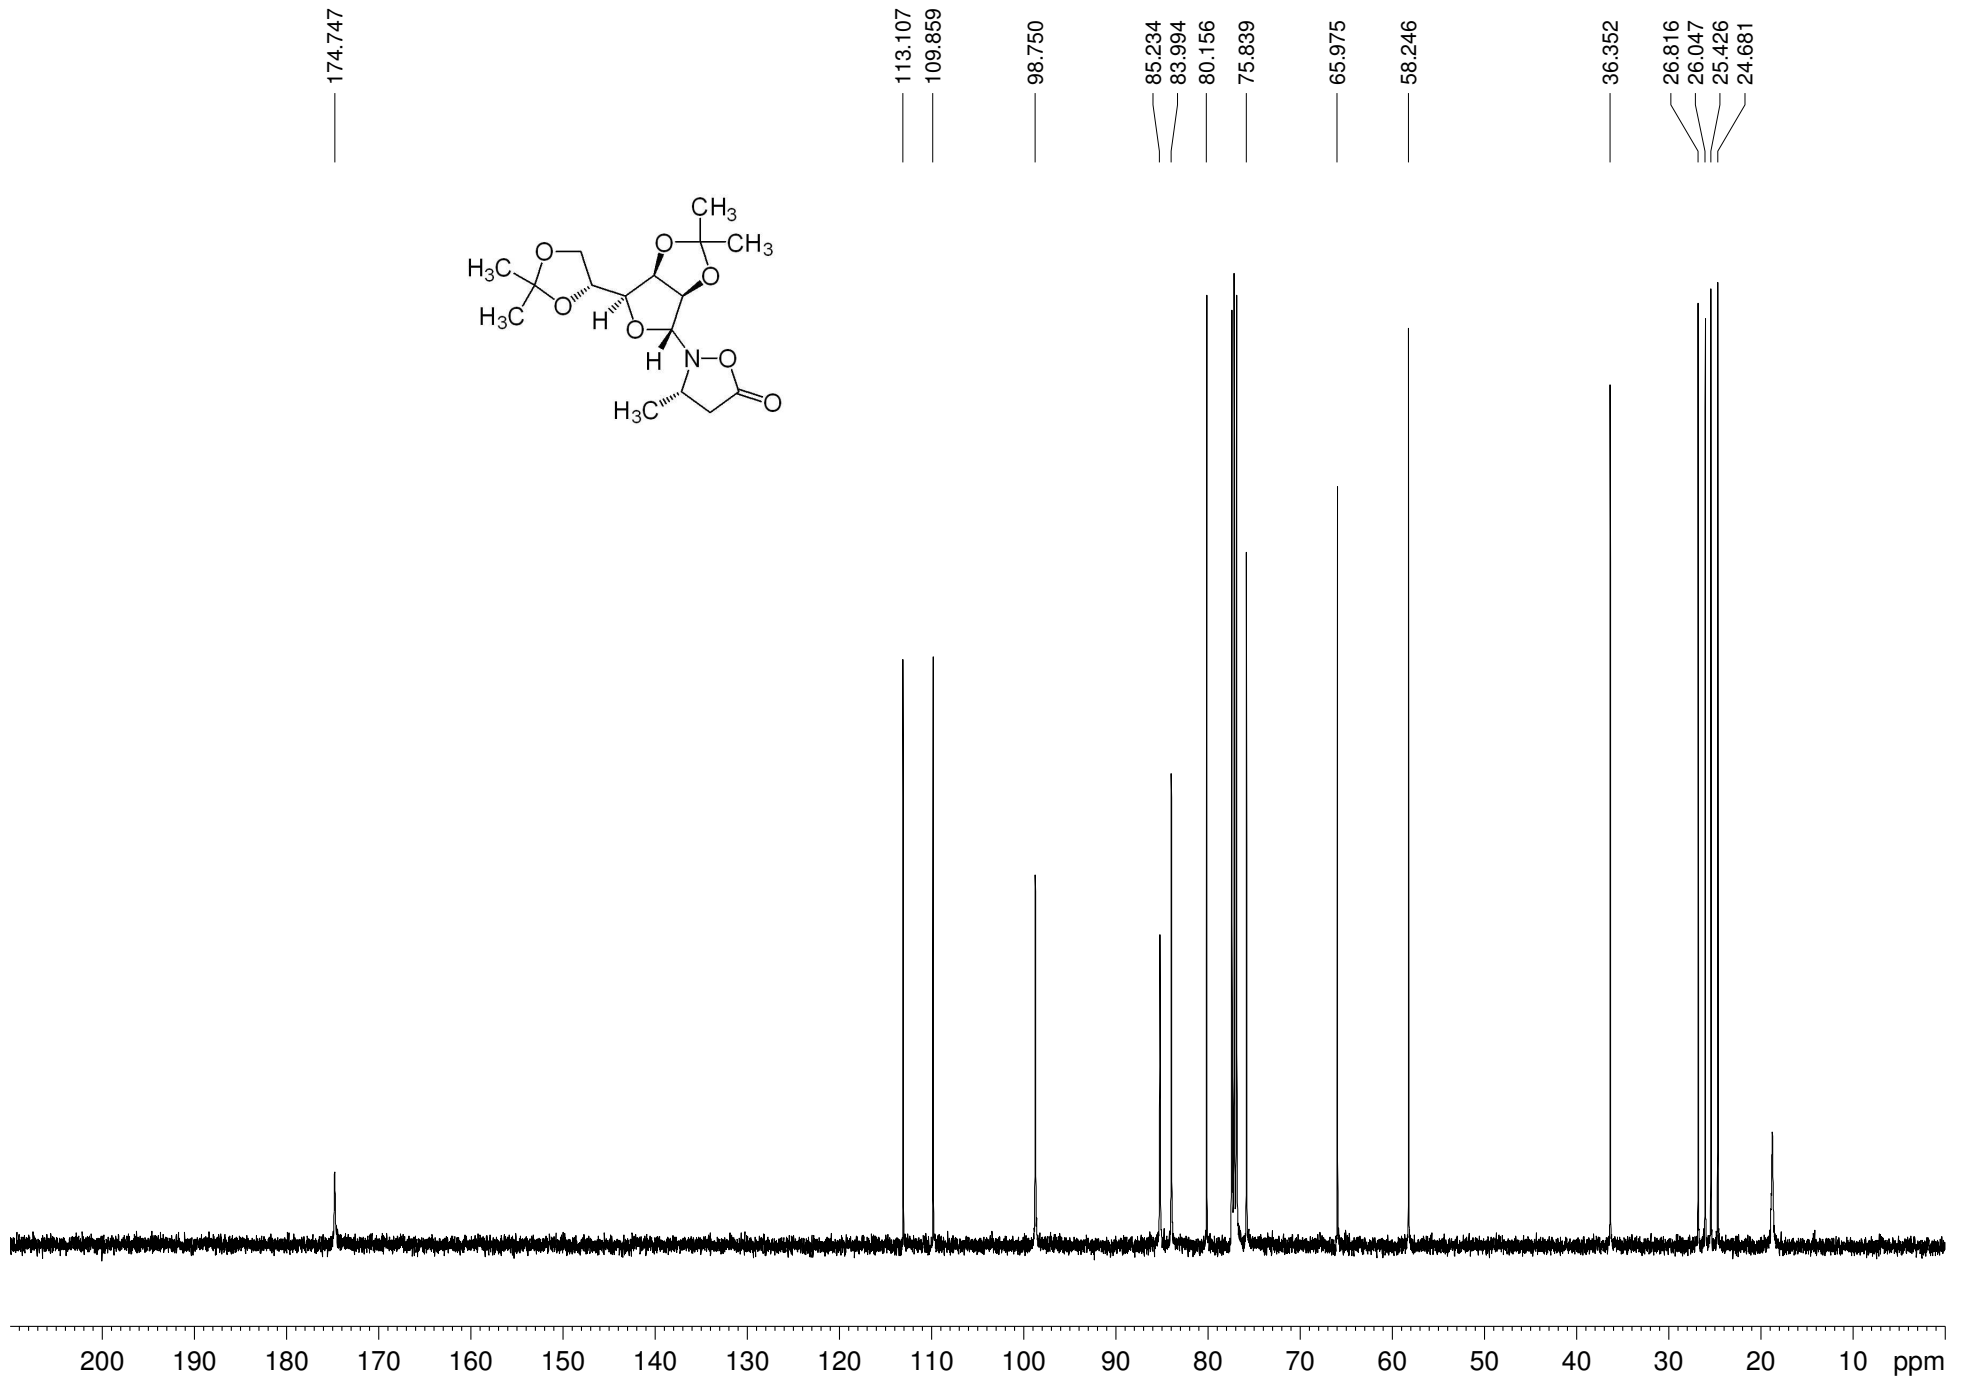

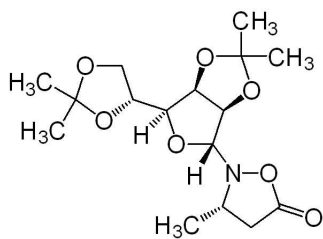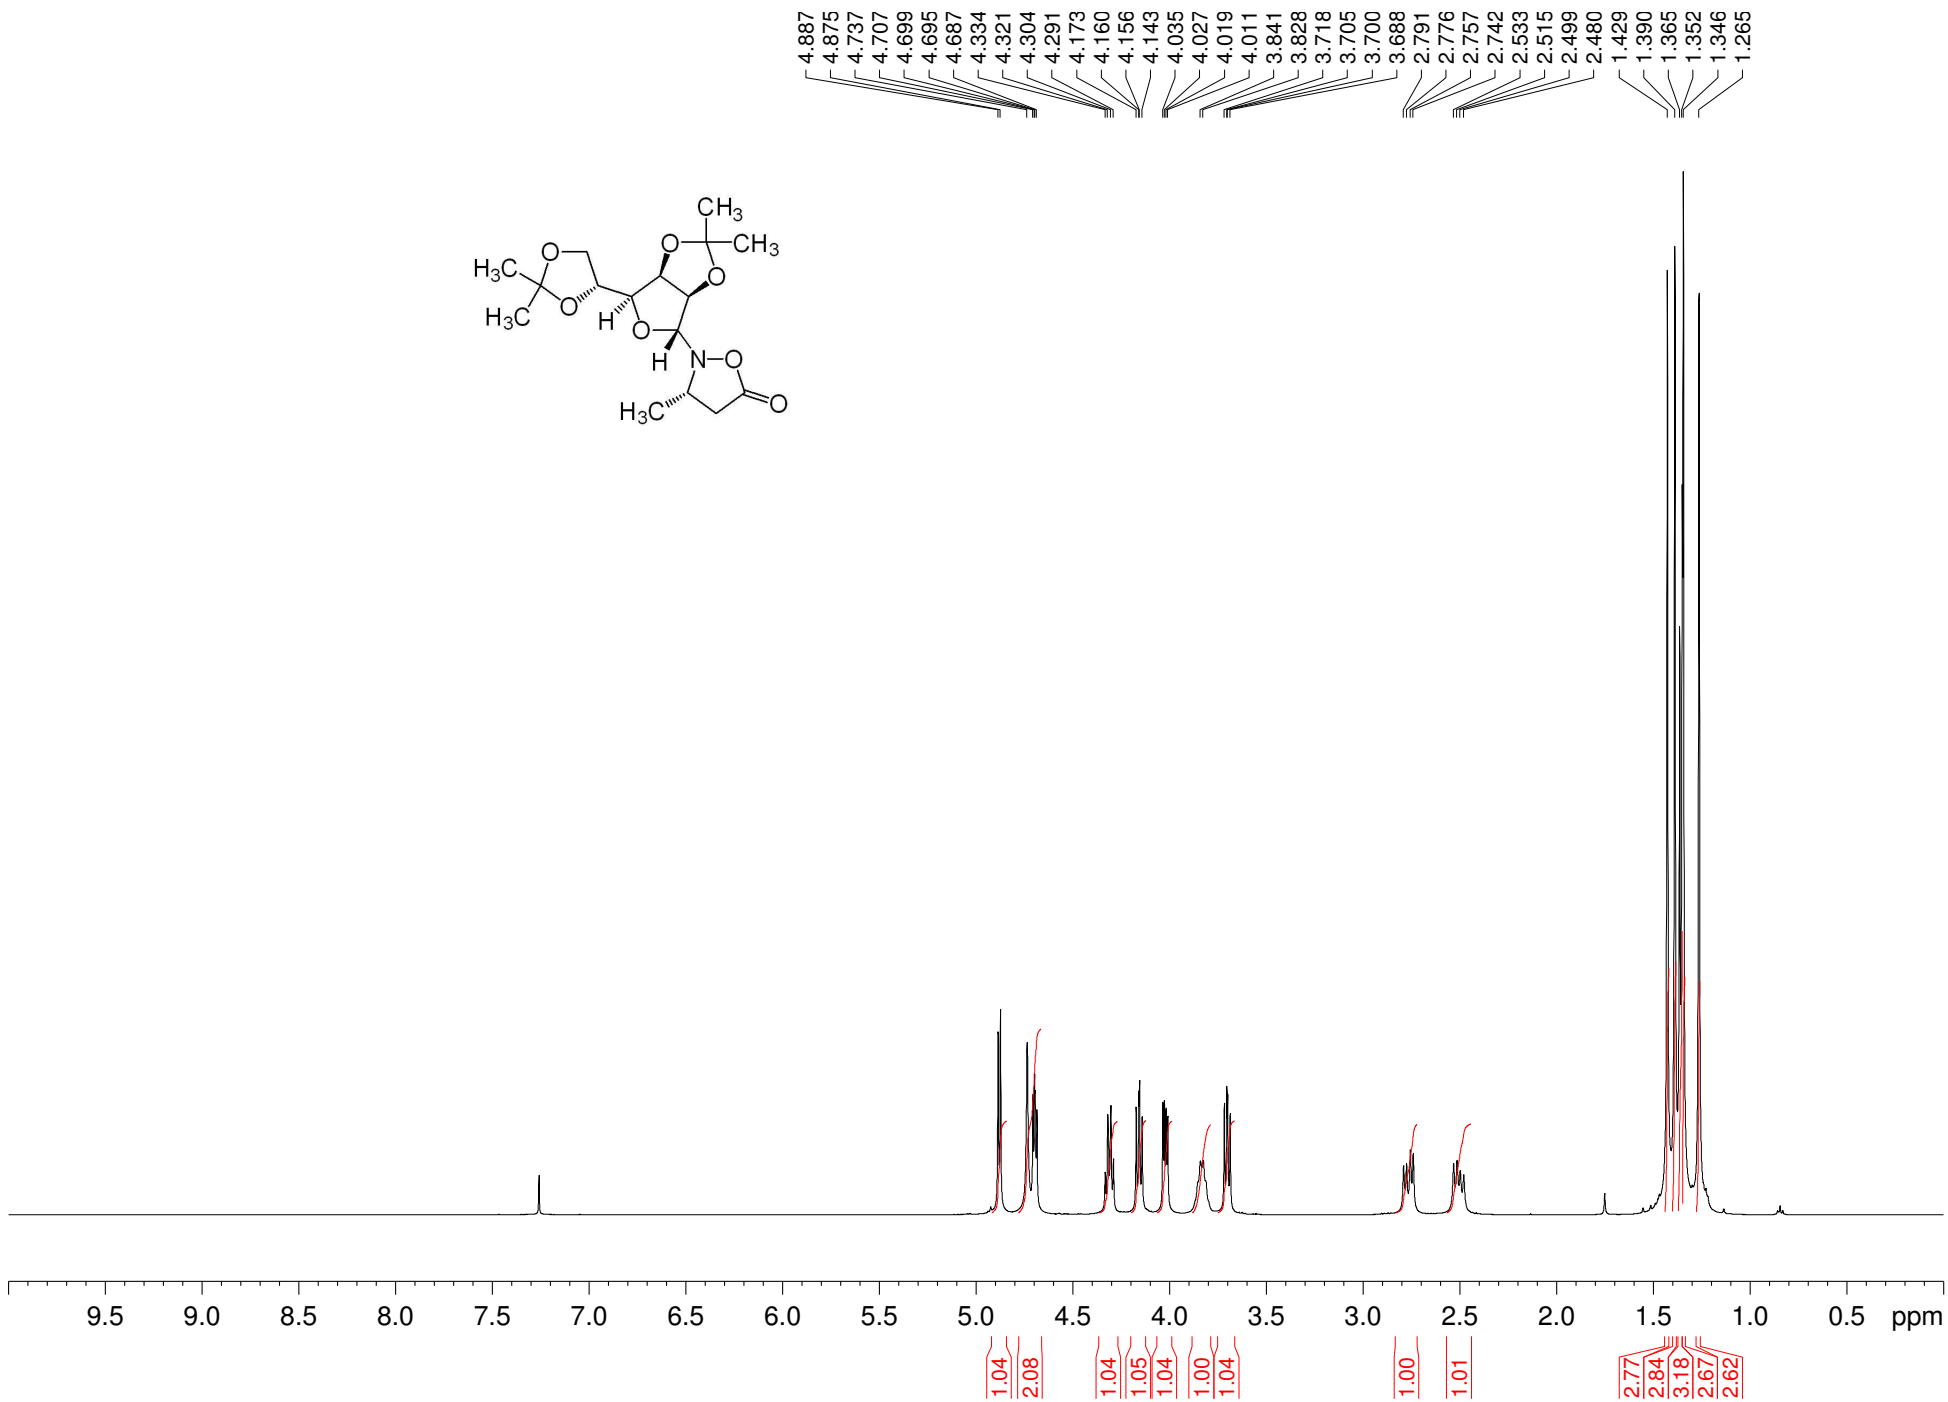

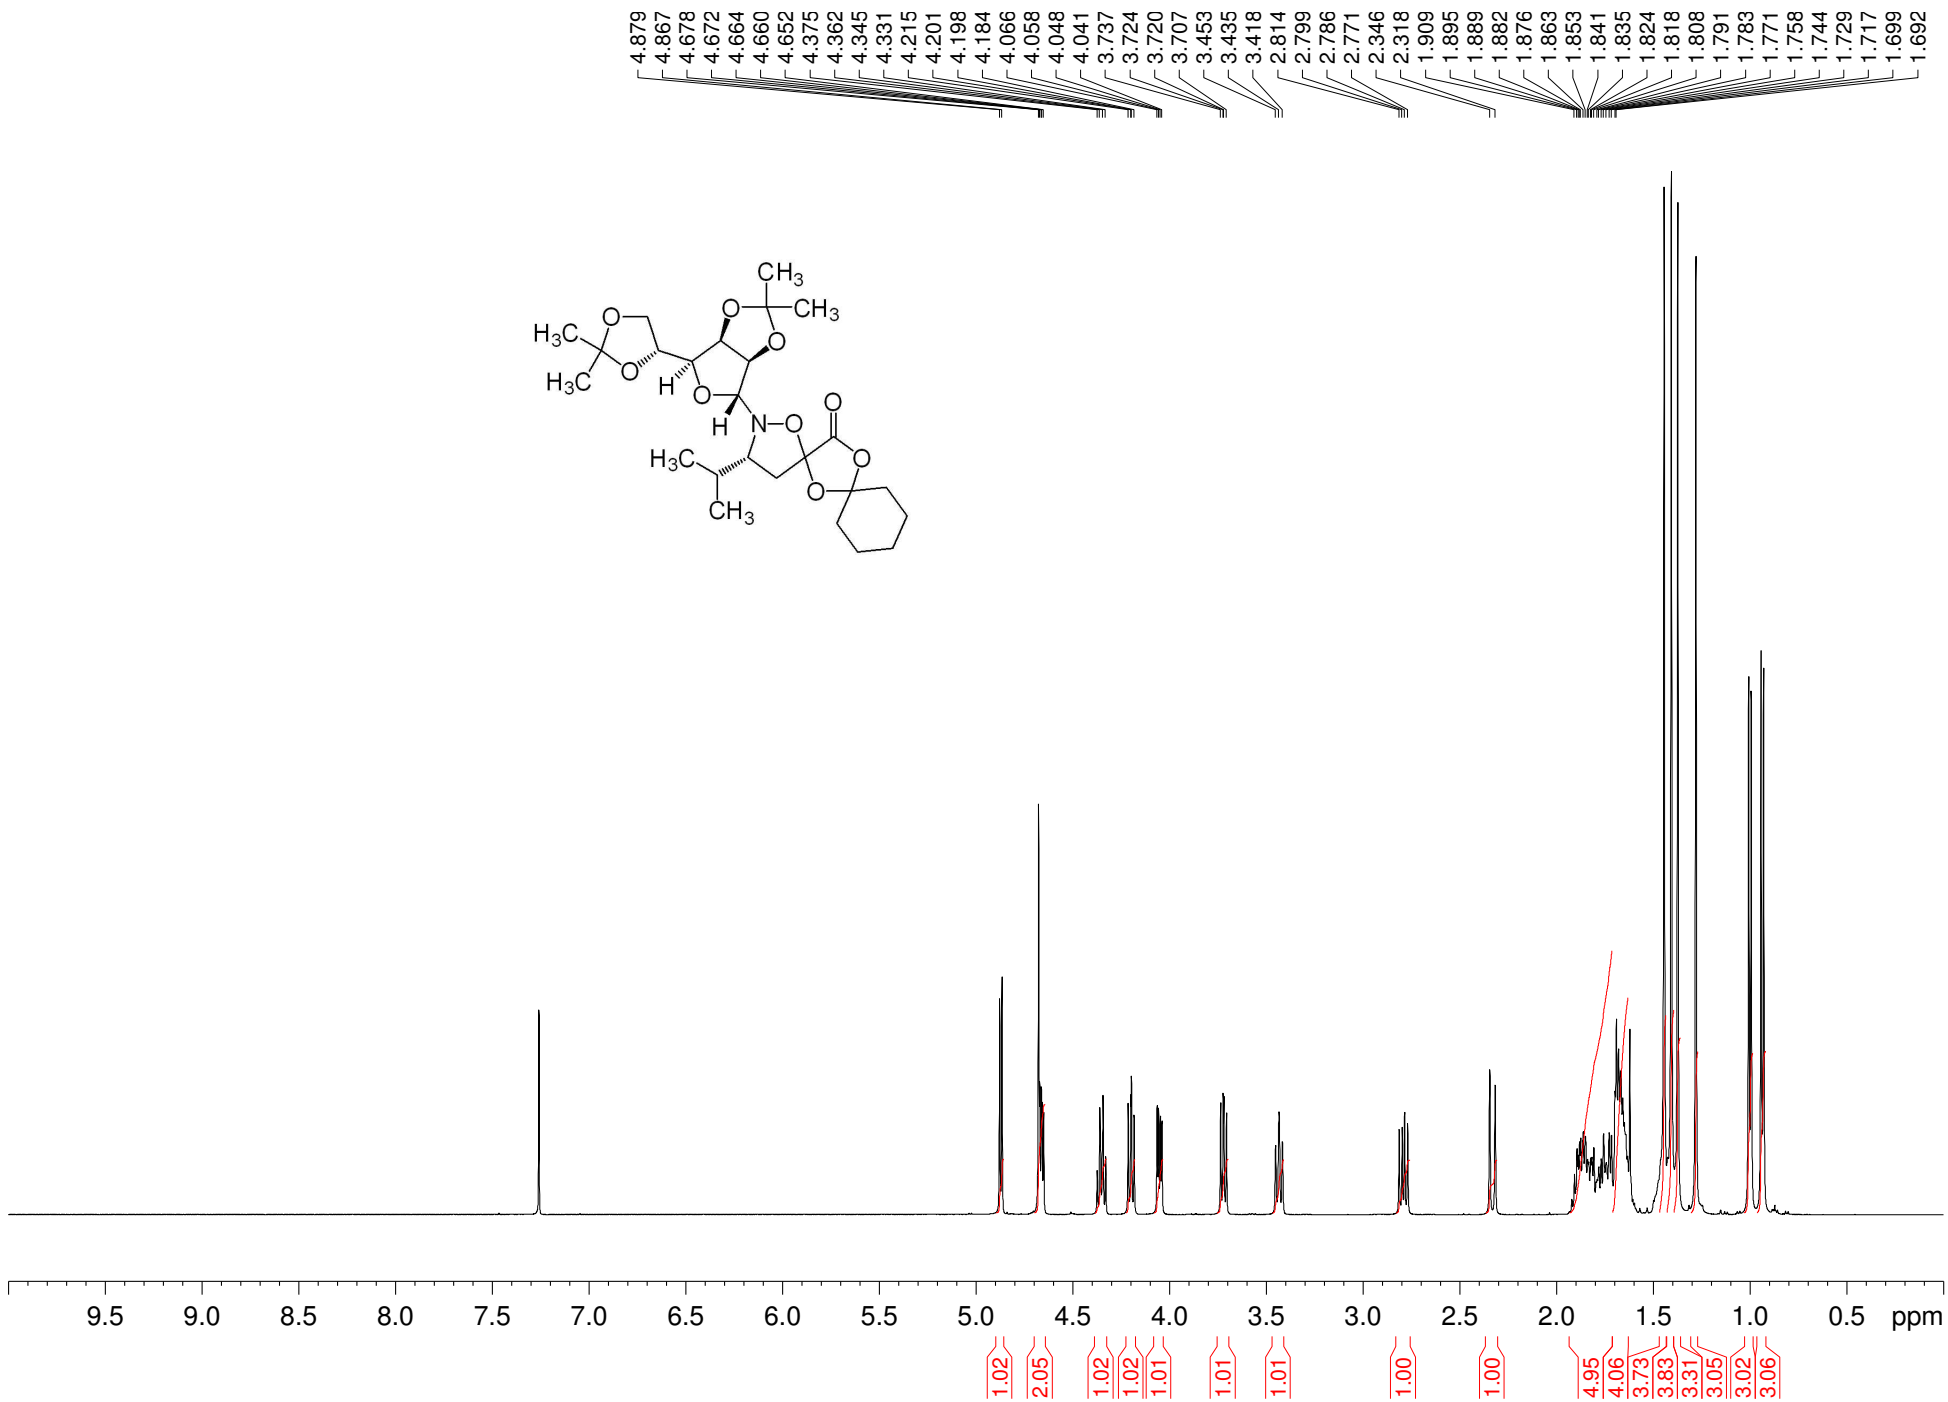

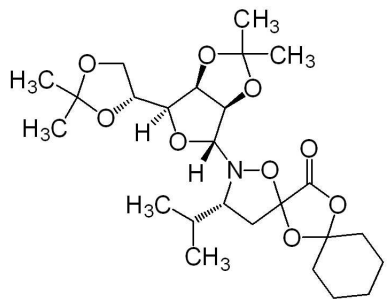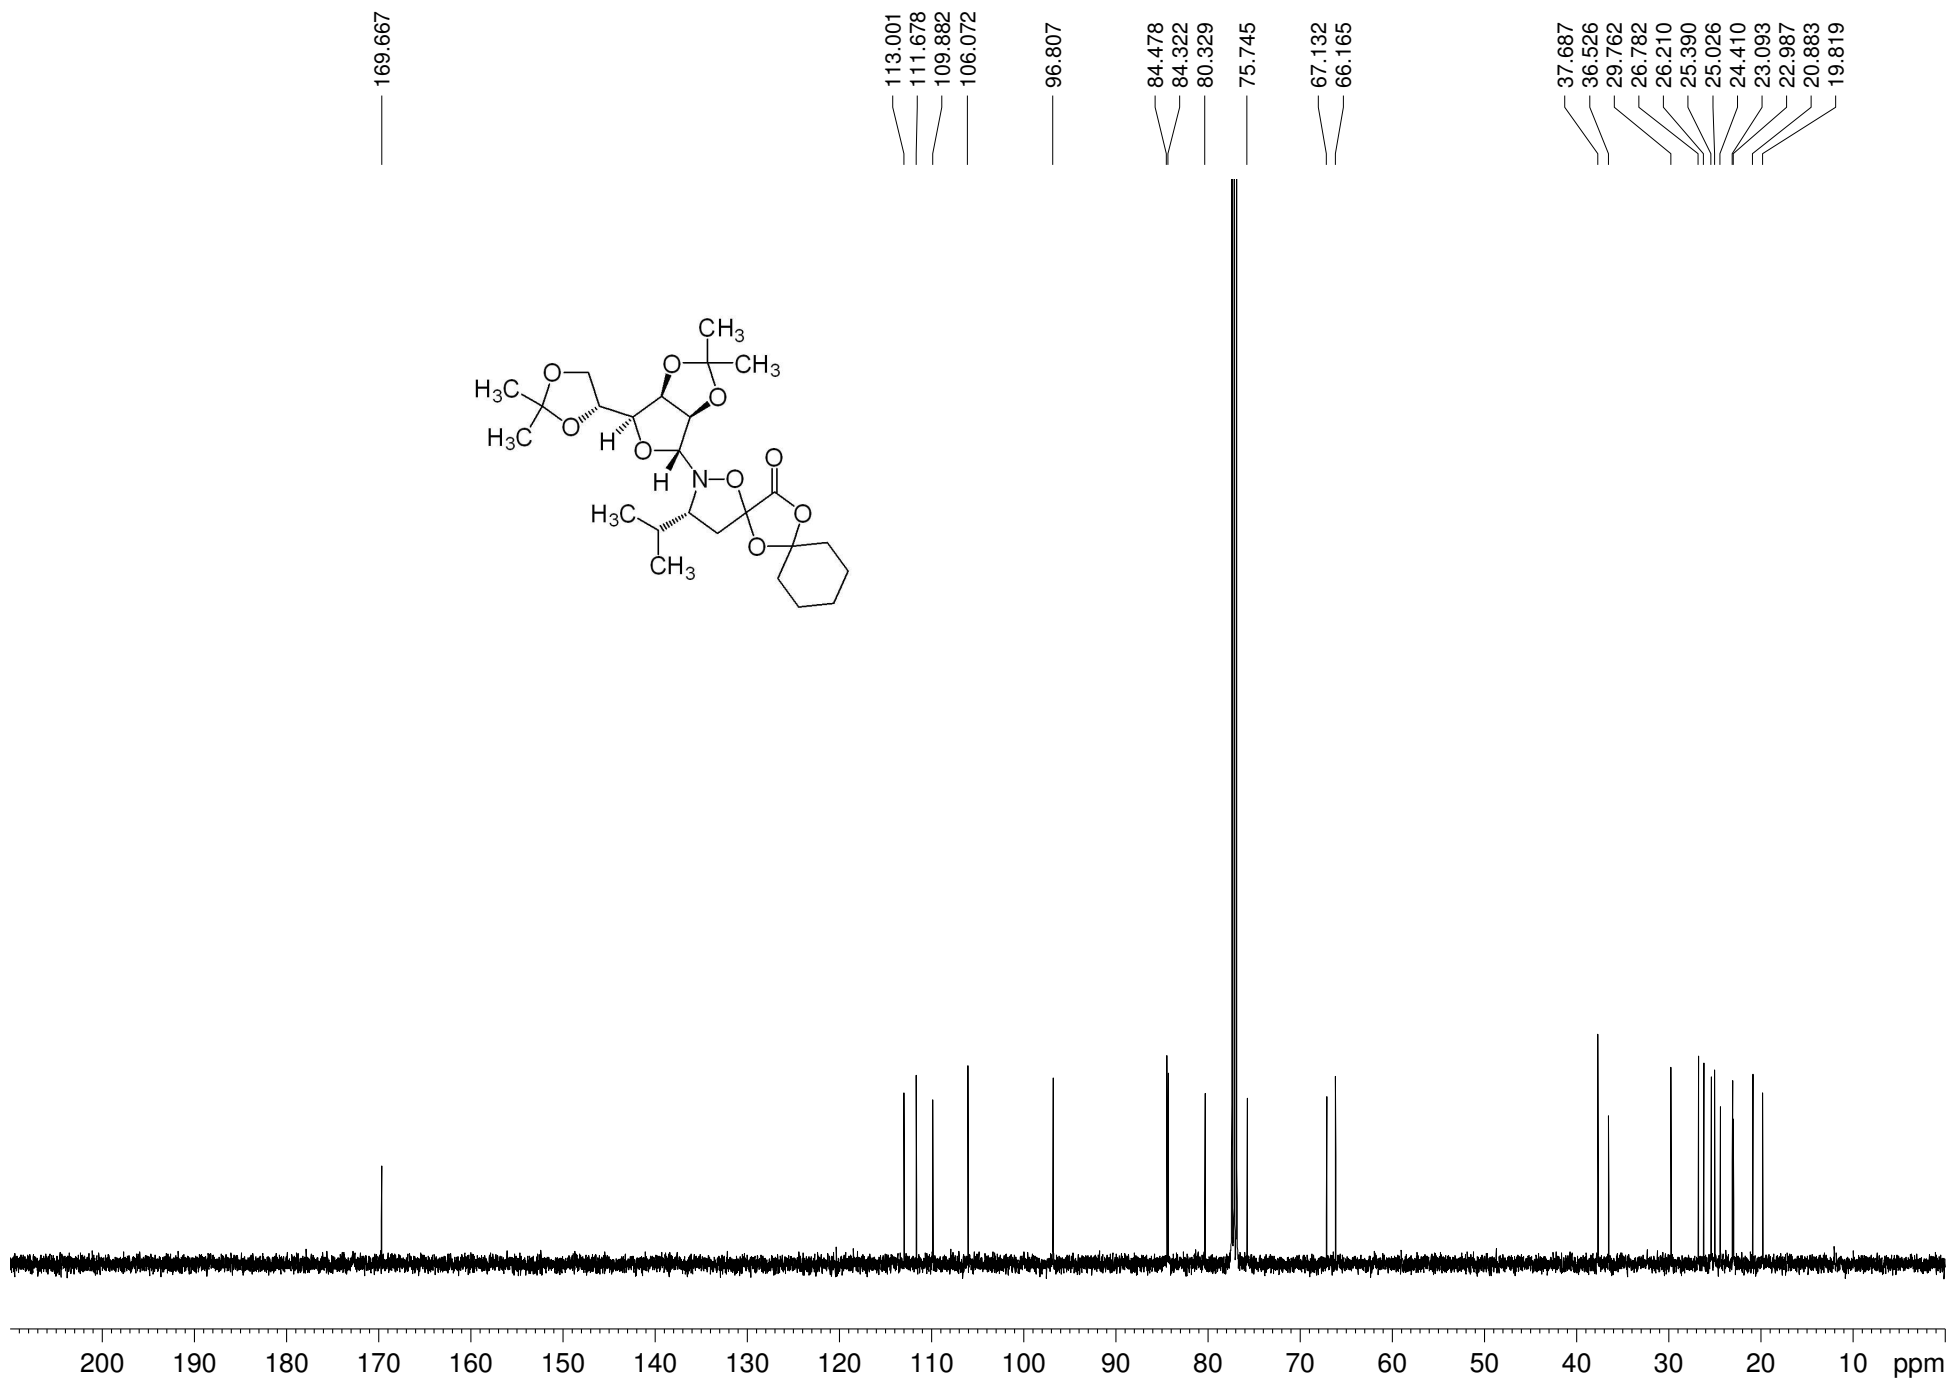

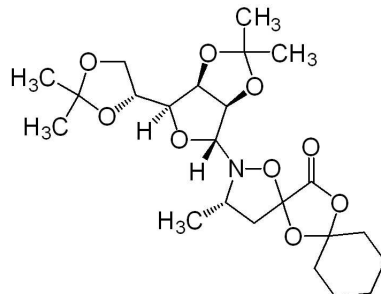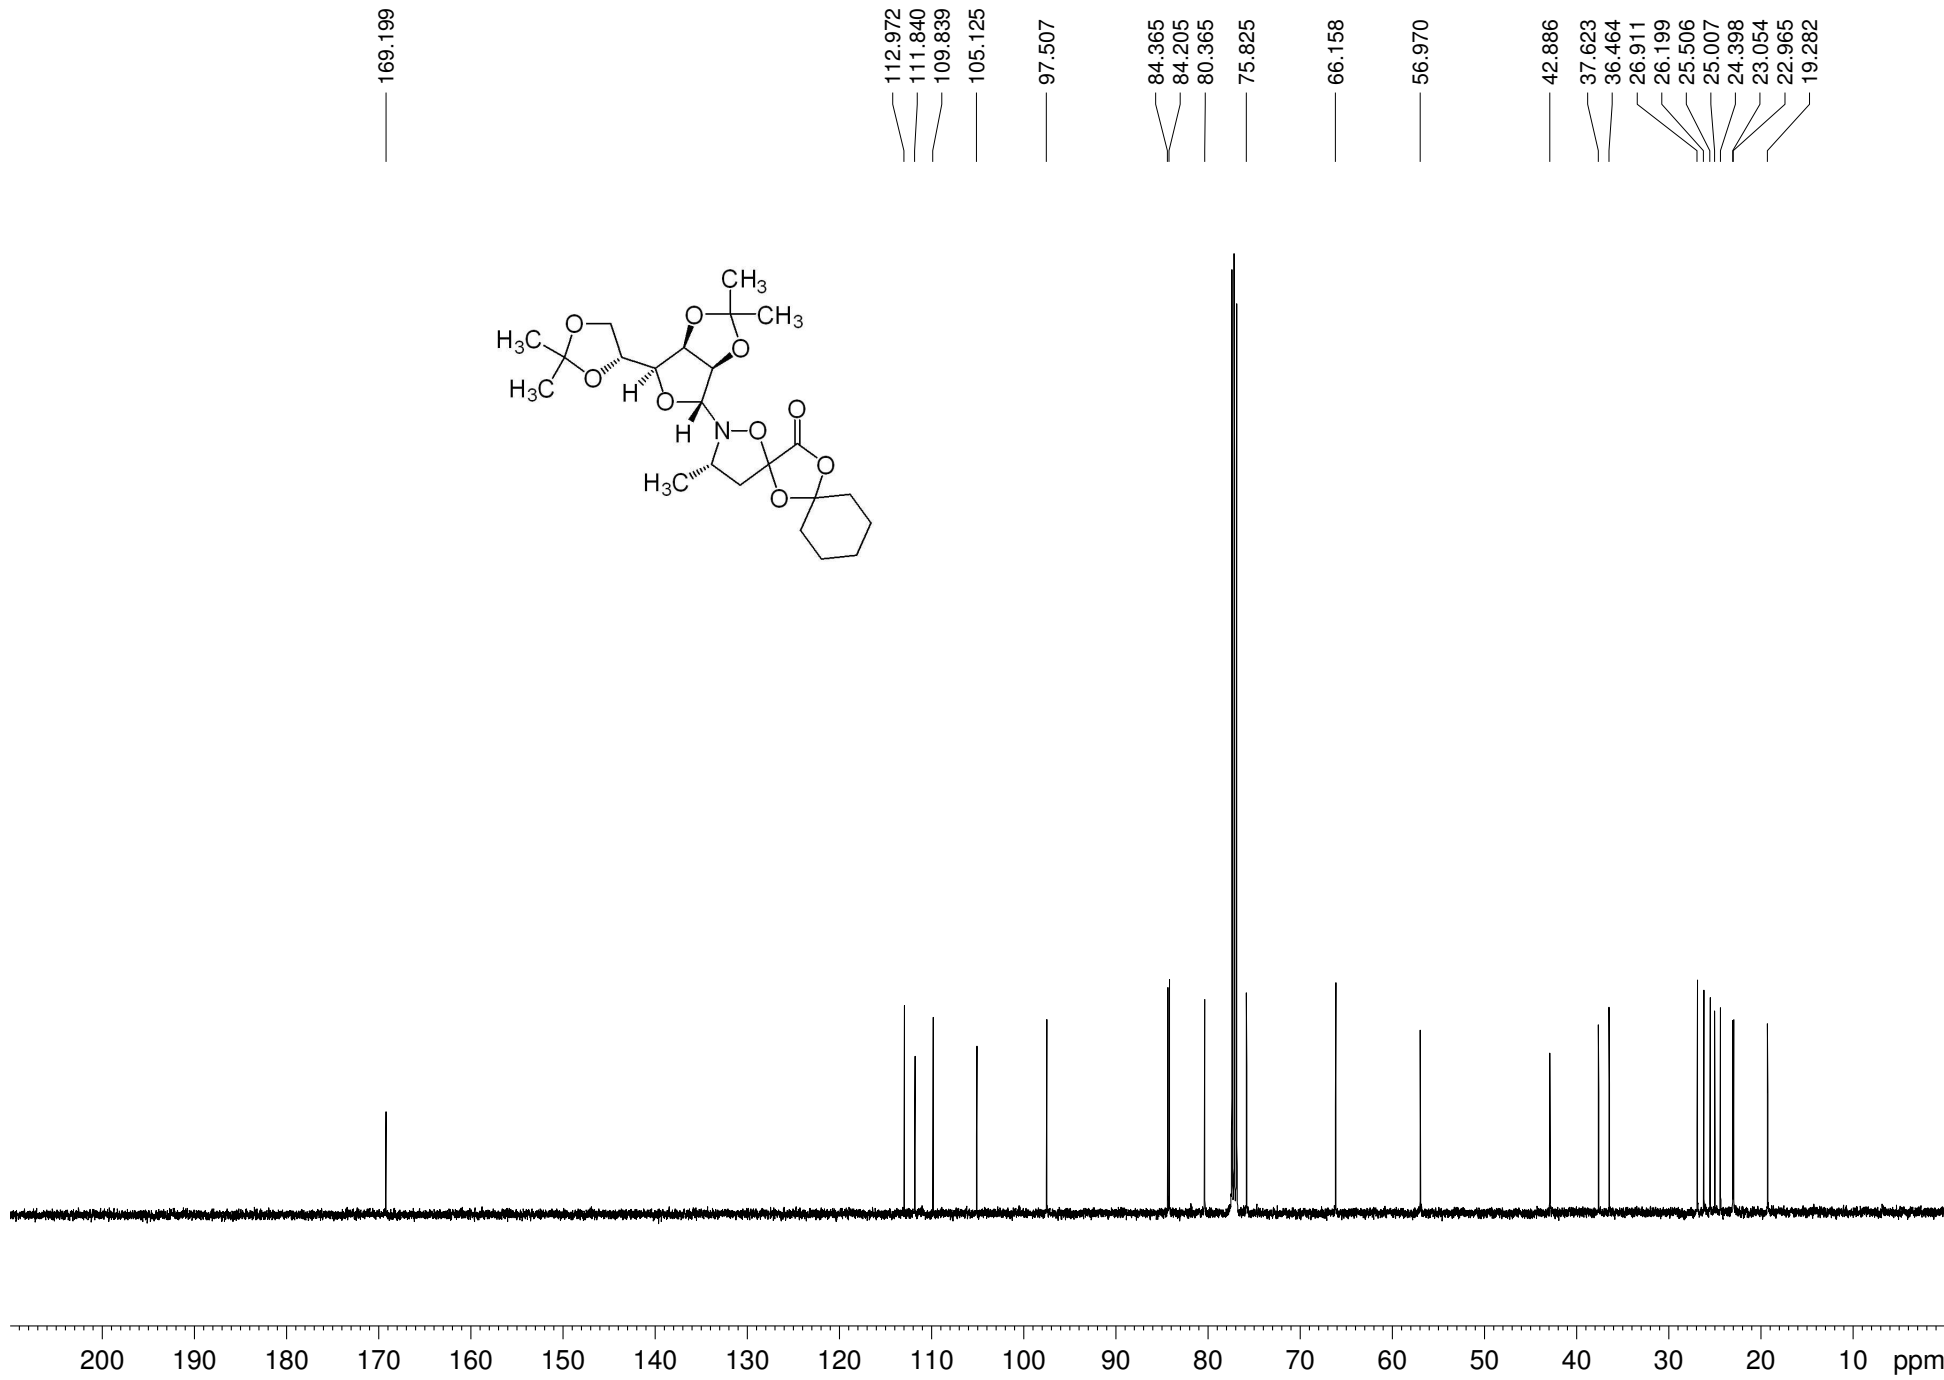

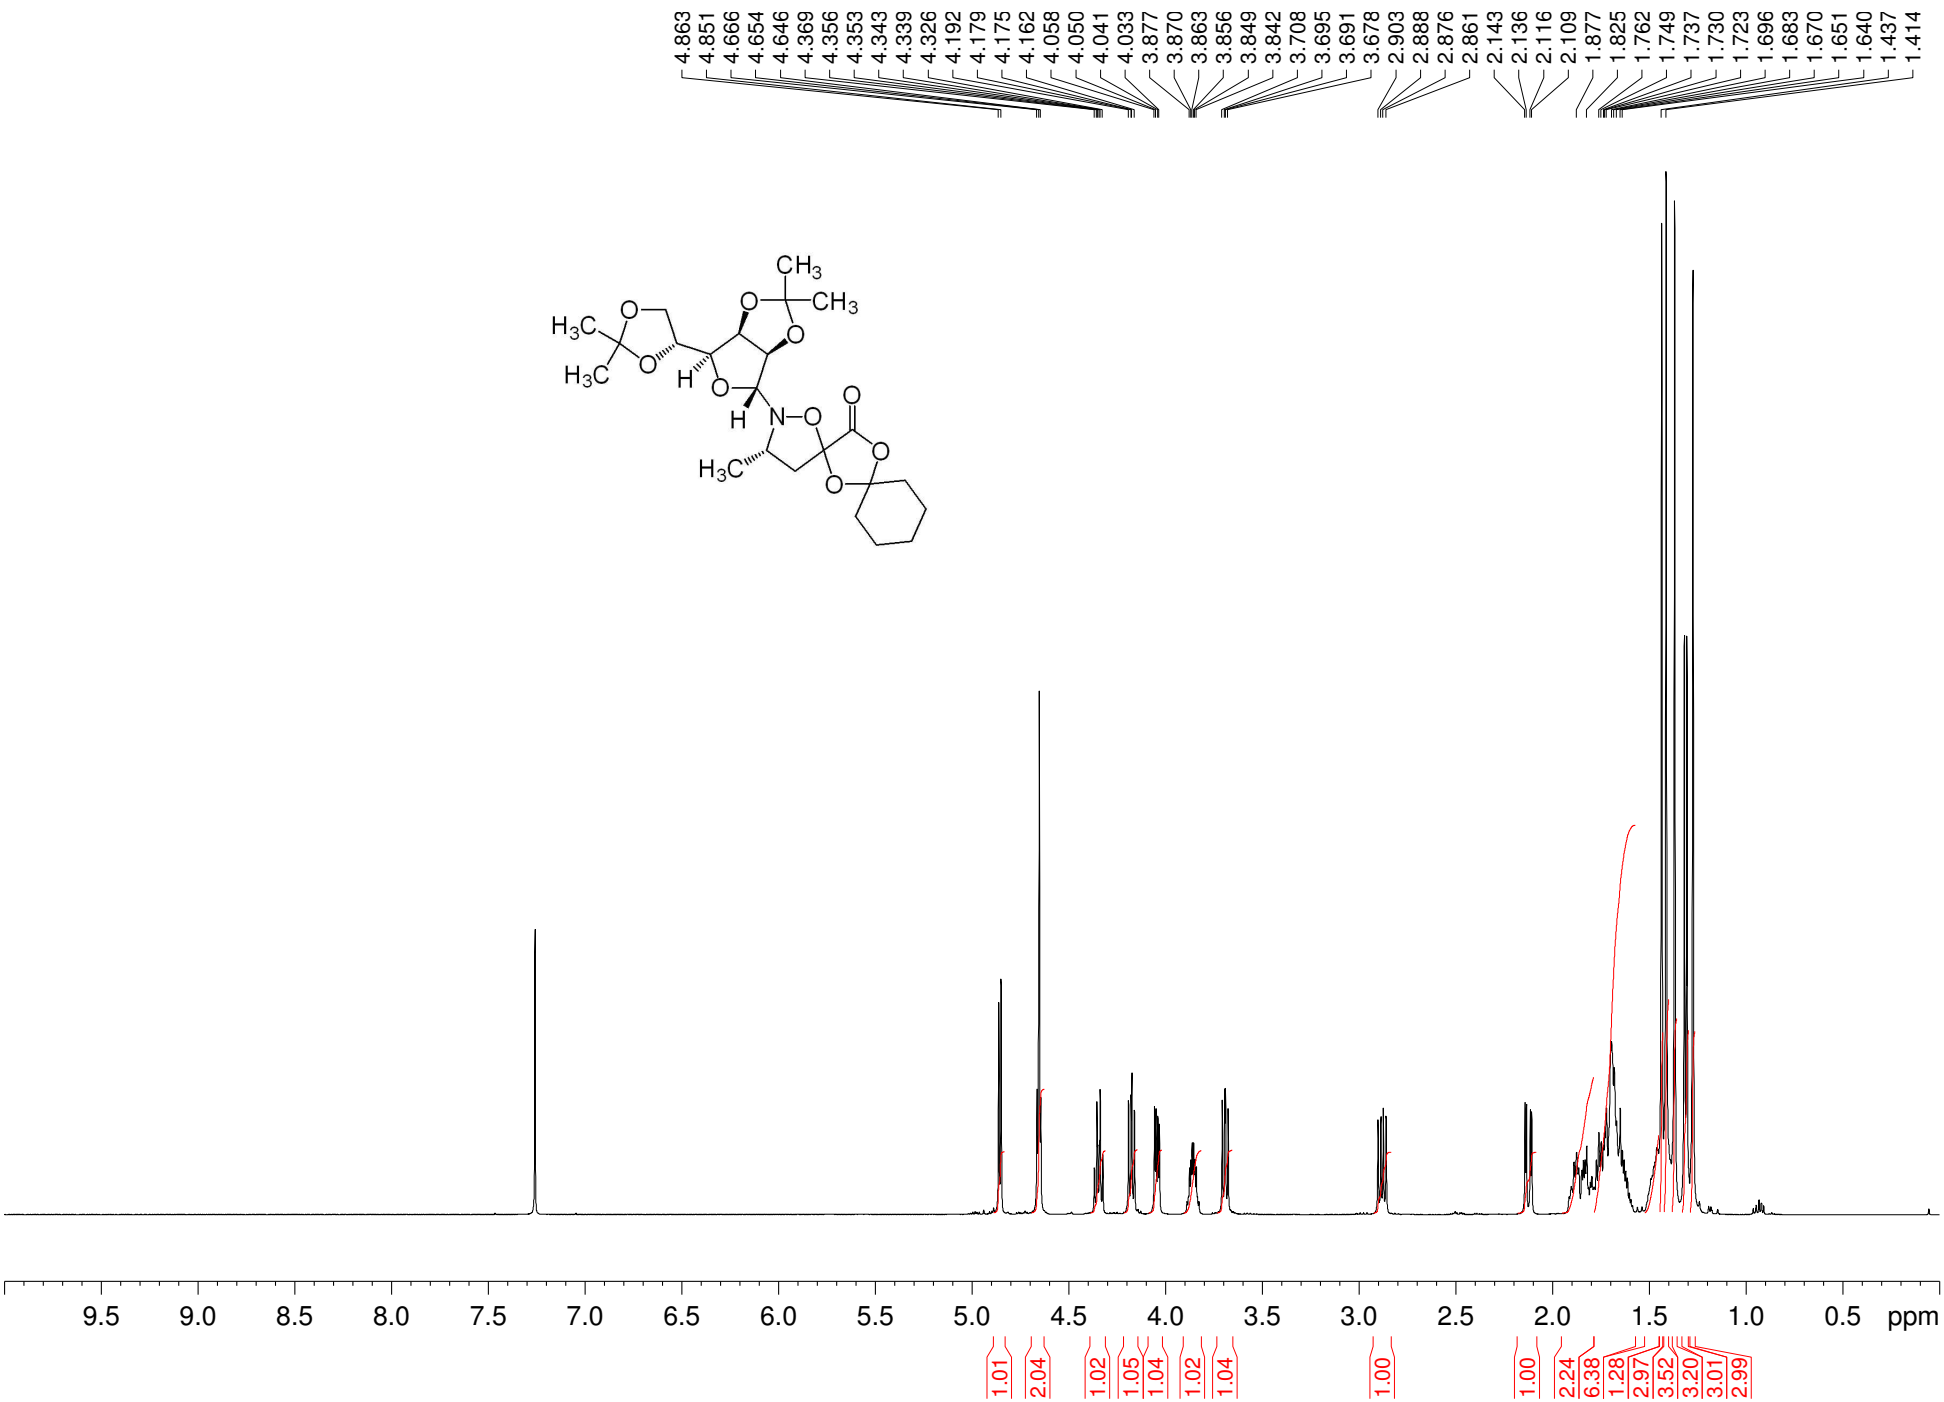

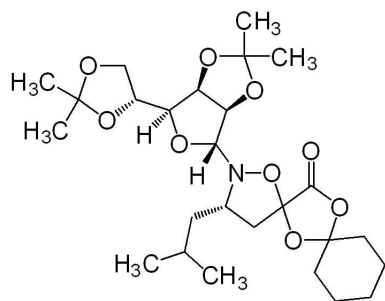

169.542

112.943

111.698

109.780

105.941

96.694

84.515

84.343

80.271

75.582

66.059

58.529

42.562

41.076

37.630

36.424

26.622

26.154

25.355

25.191

24.977

24.346

23.498

23.040

22.933

21.673

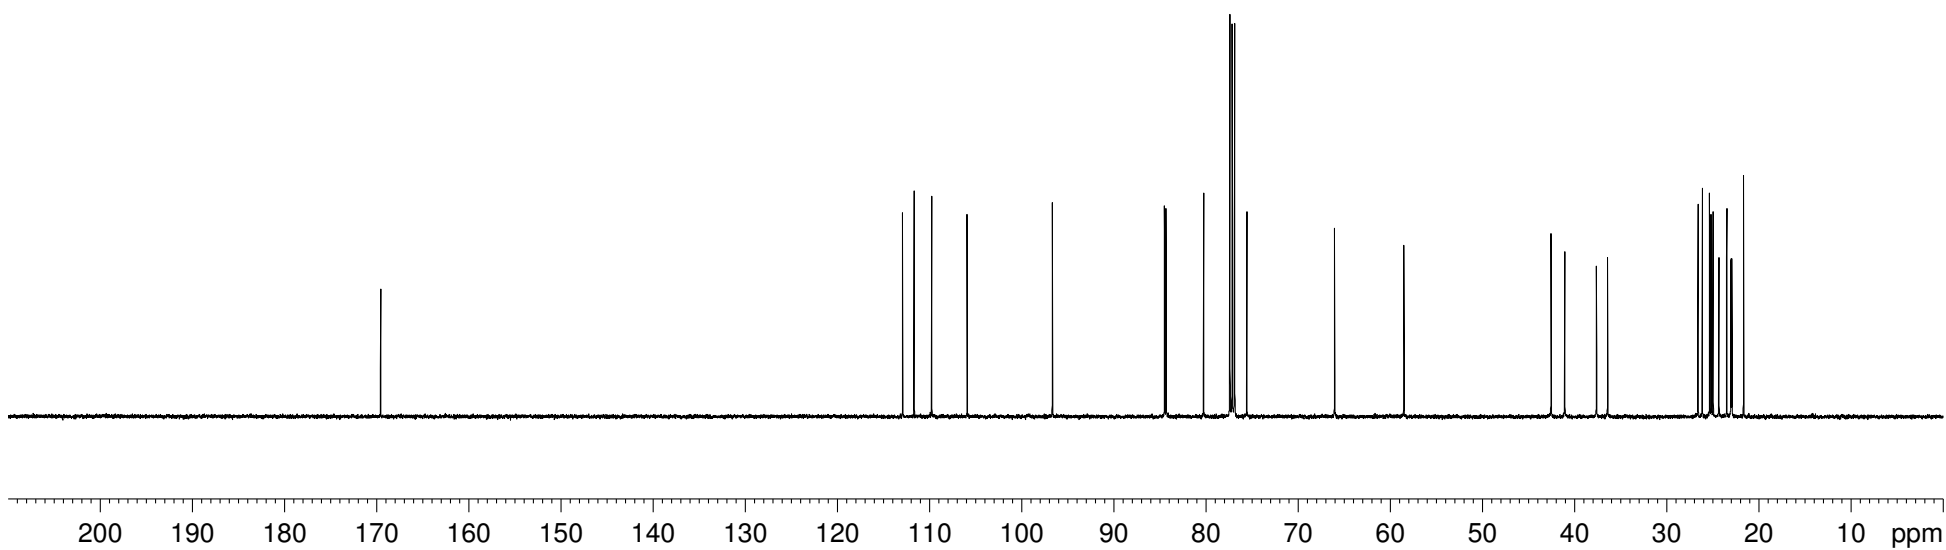

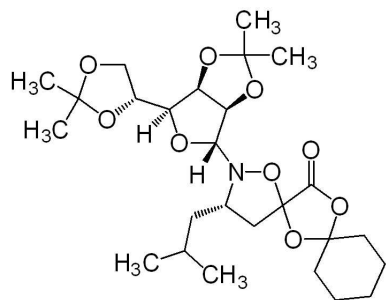

4.847  
4.835  
4.662  
4.639  
4.630  
4.619  
4.349  
4.335  
4.319  
4.305  
4.182  
4.166  
4.151  
3.988  
3.980  
3.971  
3.963  
3.935  
3.913  
3.890  
3.670  
3.654  
3.639  
2.937  
2.921  
2.909  
2.894  
2.050  
2.022  
1.847  
1.797  
1.791  
1.783  
1.770  
1.762  
1.755  
1.744  
1.734  
1.724  
1.700  
1.672  
1.658  
1.648  
1.619  
1.592  
1.465  
1.445  
1.415  
1.375

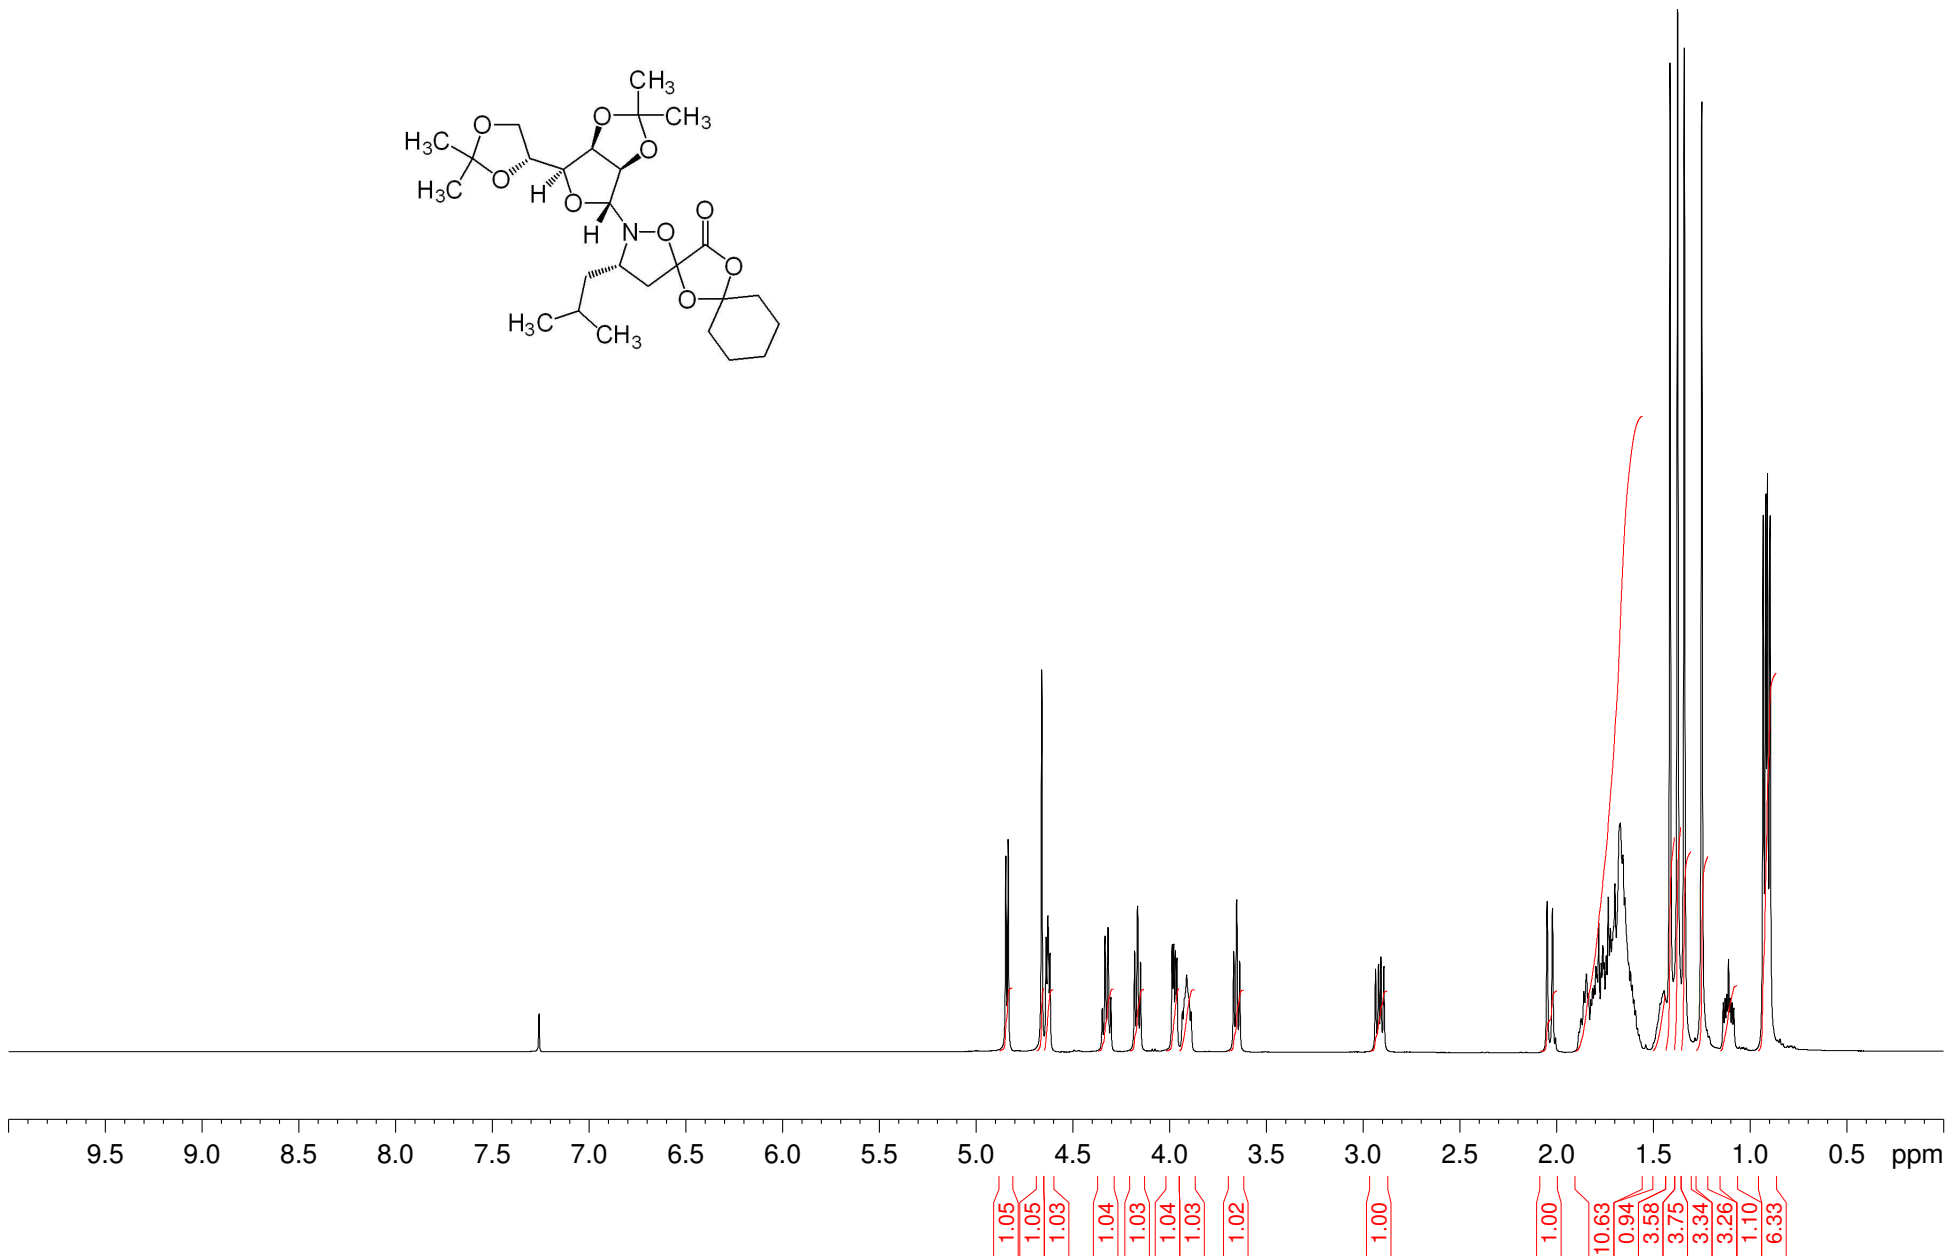



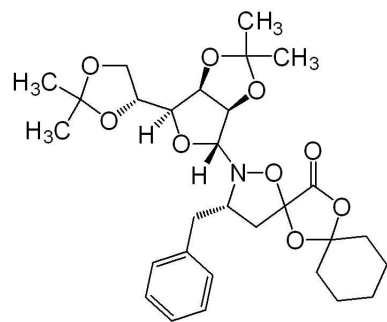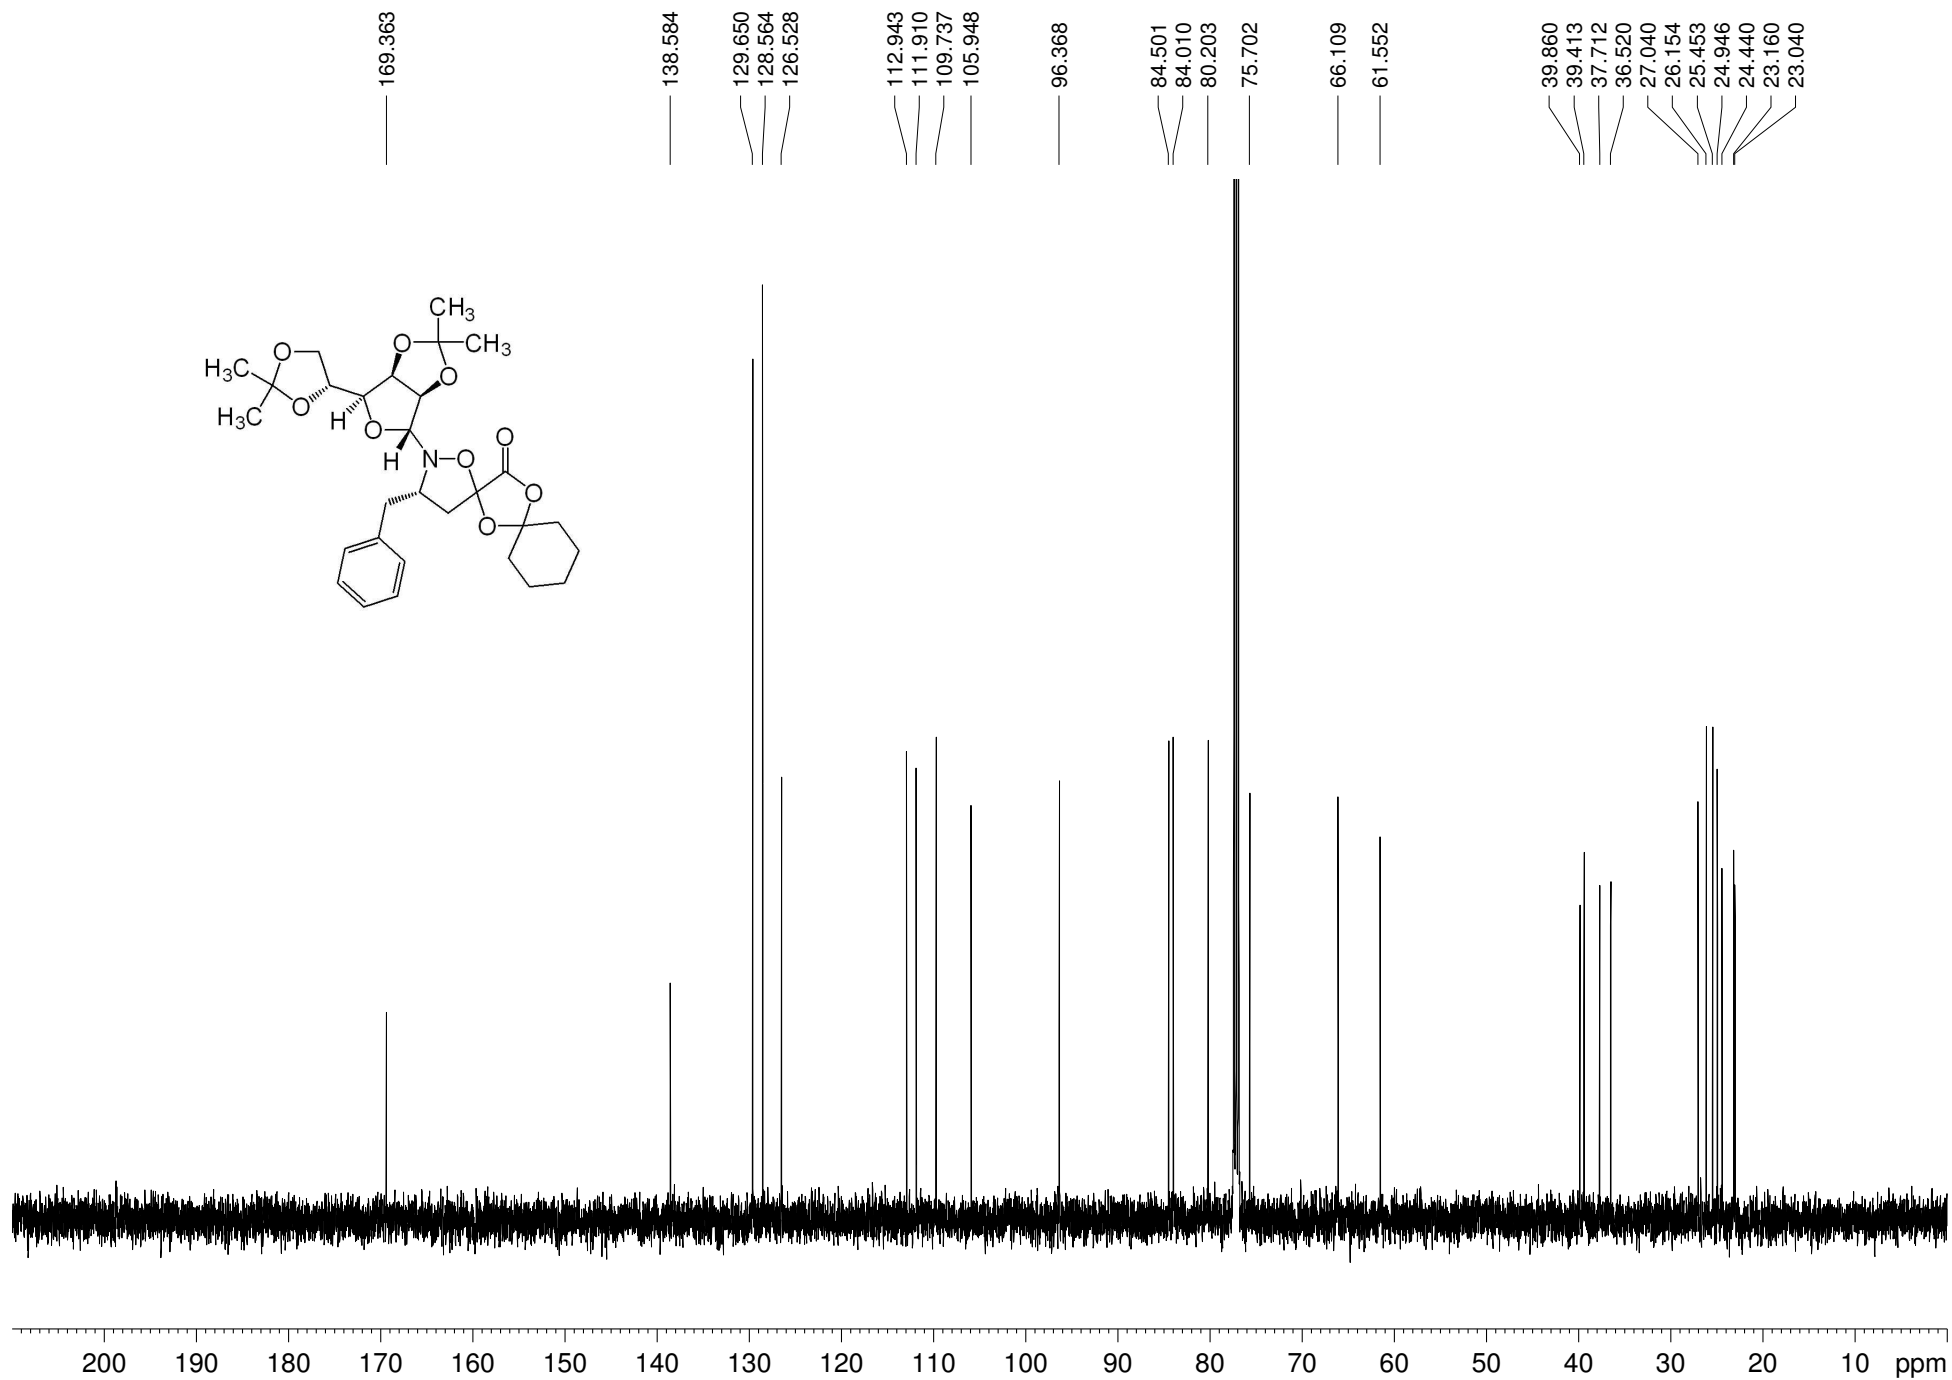

7.300  
7.285  
7.270  
7.261  
7.226  
7.211  
7.204

4.848  
4.835  
4.695  
4.561  
4.553  
4.550  
4.541  
4.290  
4.276  
4.260  
4.246  
4.133  
4.116  
4.103  
3.581  
3.573  
3.564  
3.556  
3.541  
3.525  
3.510  
3.085  
3.069  
3.058  
3.042  
2.834  
2.819  
2.806  
2.791  
2.218  
2.191  
1.930  
1.919  
1.906  
1.897  
1.799  
1.786  
1.771  
1.744  
1.731  
1.701  
1.597  
1.486  
1.474  
1.428  
1.418

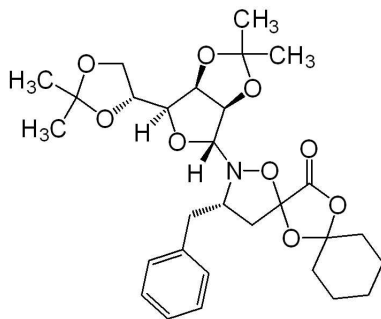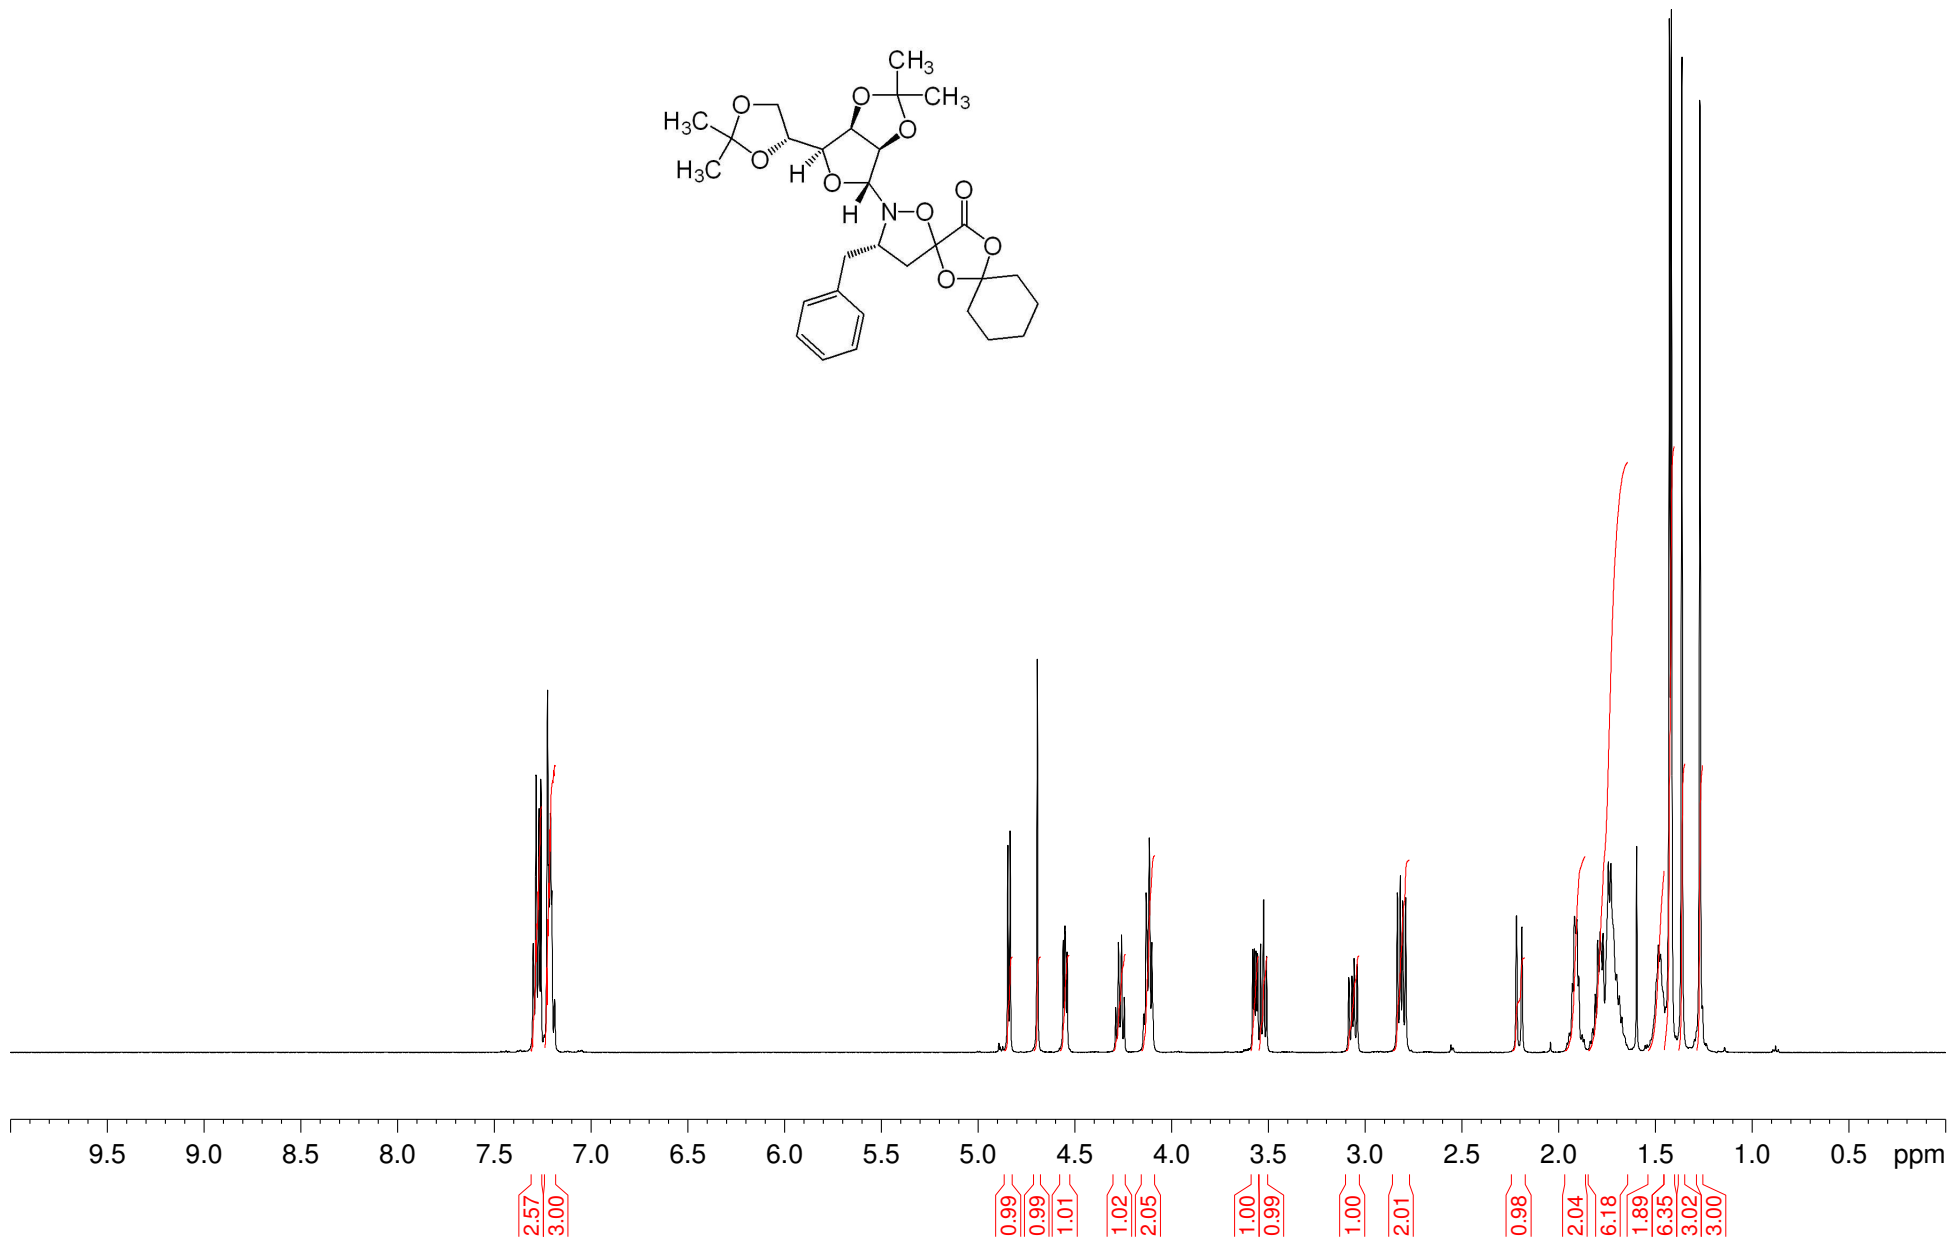

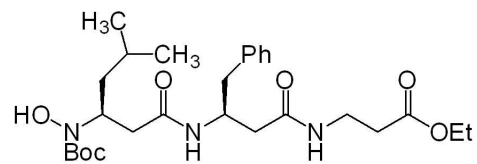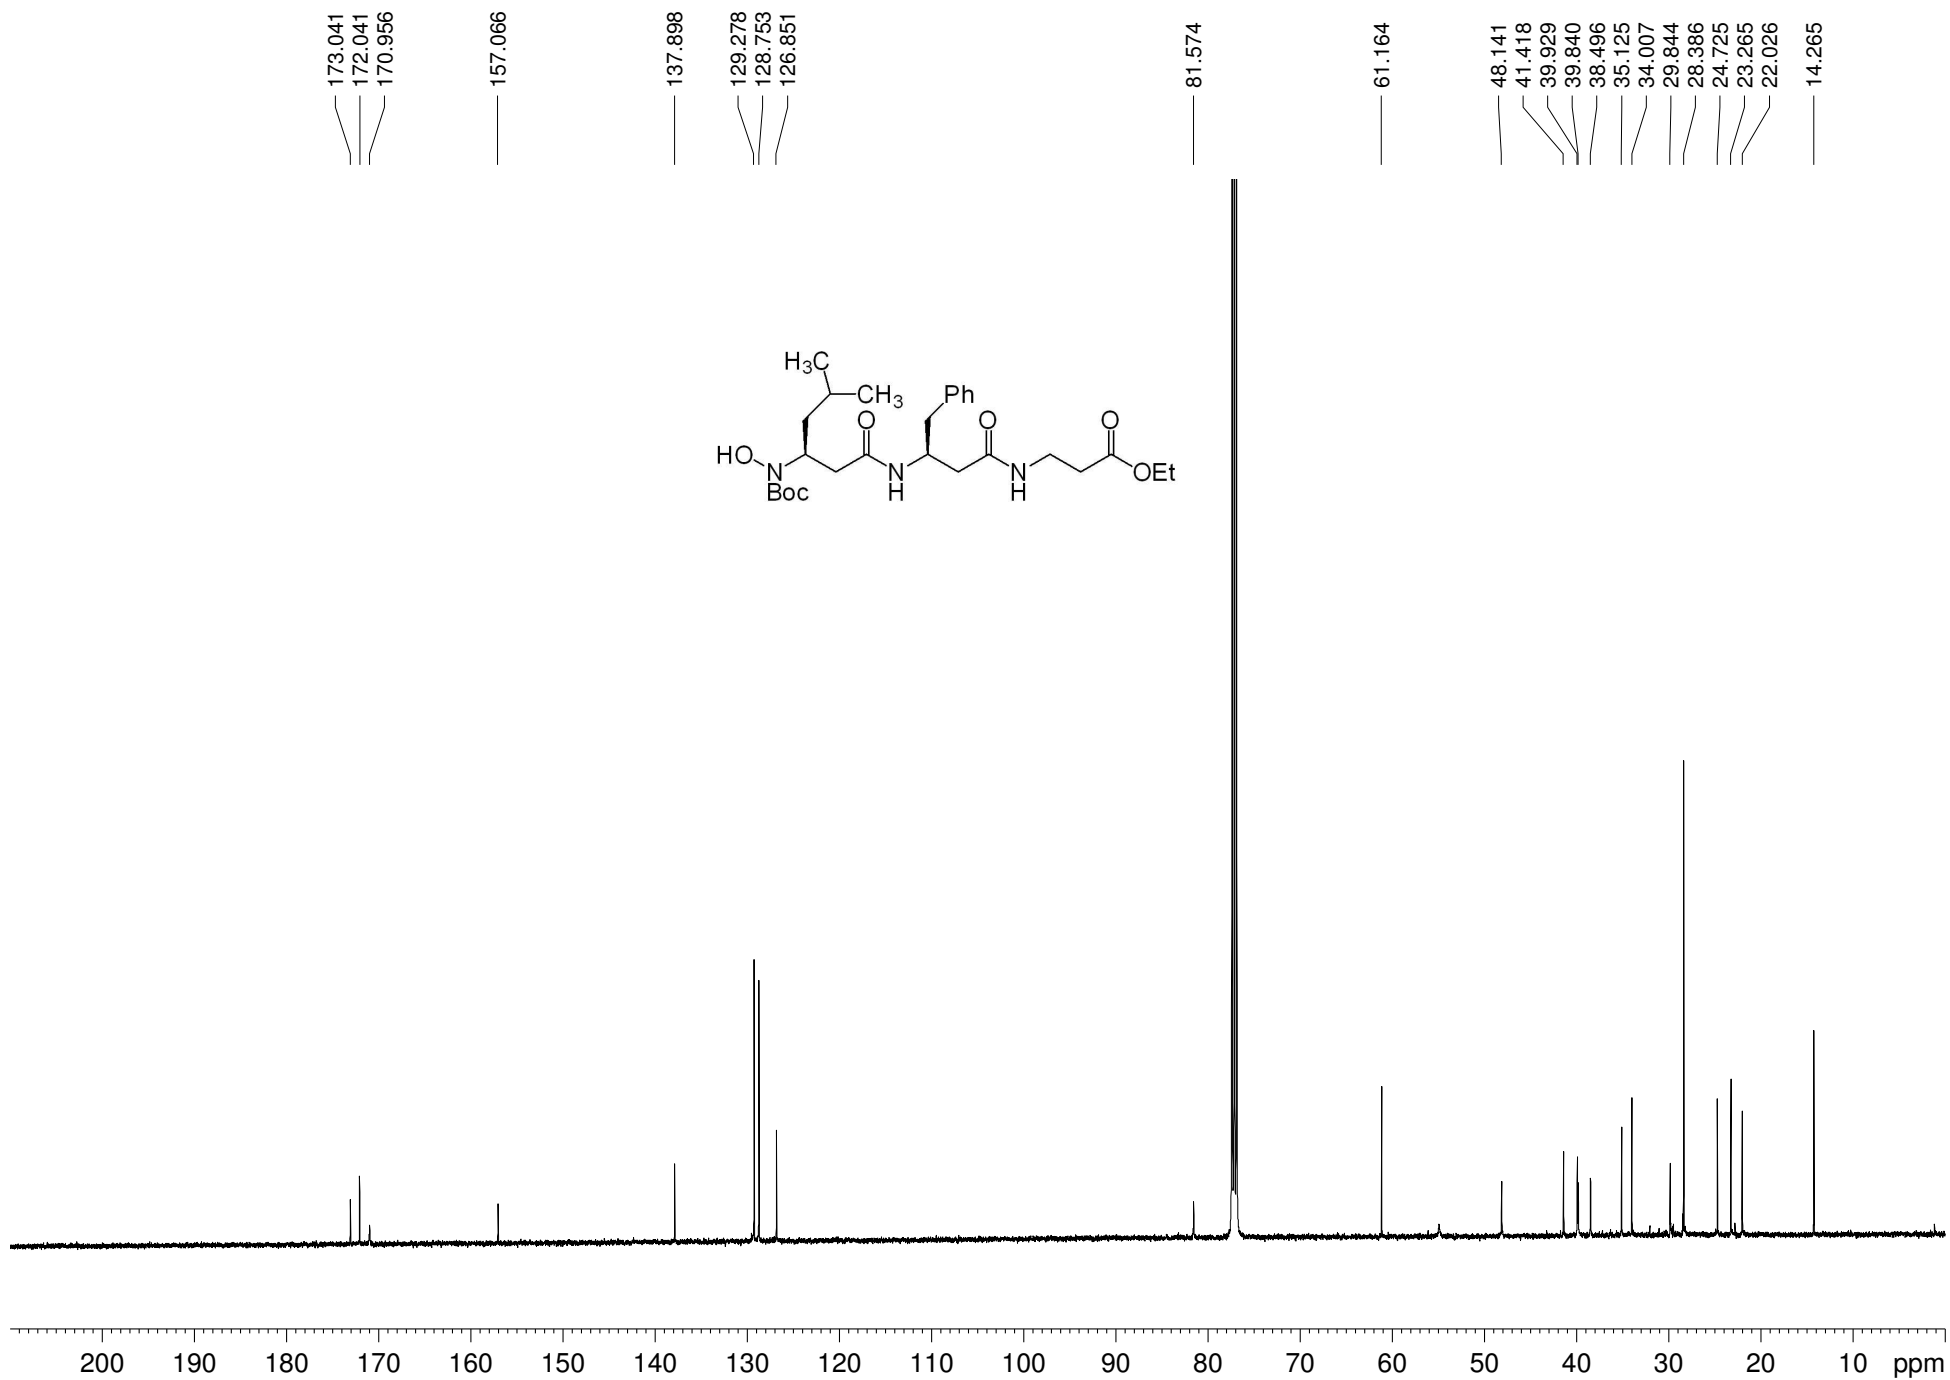

7.819  
7.293  
7.279  
7.261  
7.229  
7.214  
7.200  
7.175  
7.161  
6.801  
6.784  
6.430

4.462  
4.454  
4.444  
4.173  
4.159  
4.145  
4.130  
3.507  
2.945  
2.930  
2.918  
2.906  
2.762  
2.745  
2.735  
2.717  
2.543  
2.531  
2.518  
2.509  
2.505  
2.482  
2.356  
2.349  
2.327  
2.320  
2.239  
2.231  
2.211  
2.204  
2.184  
2.172  
2.155  
2.143  
1.703  
1.694  
1.675  
1.667  
1.656  
1.647  
1.436  
1.276  
1.262  
1.252

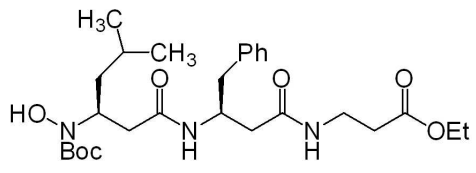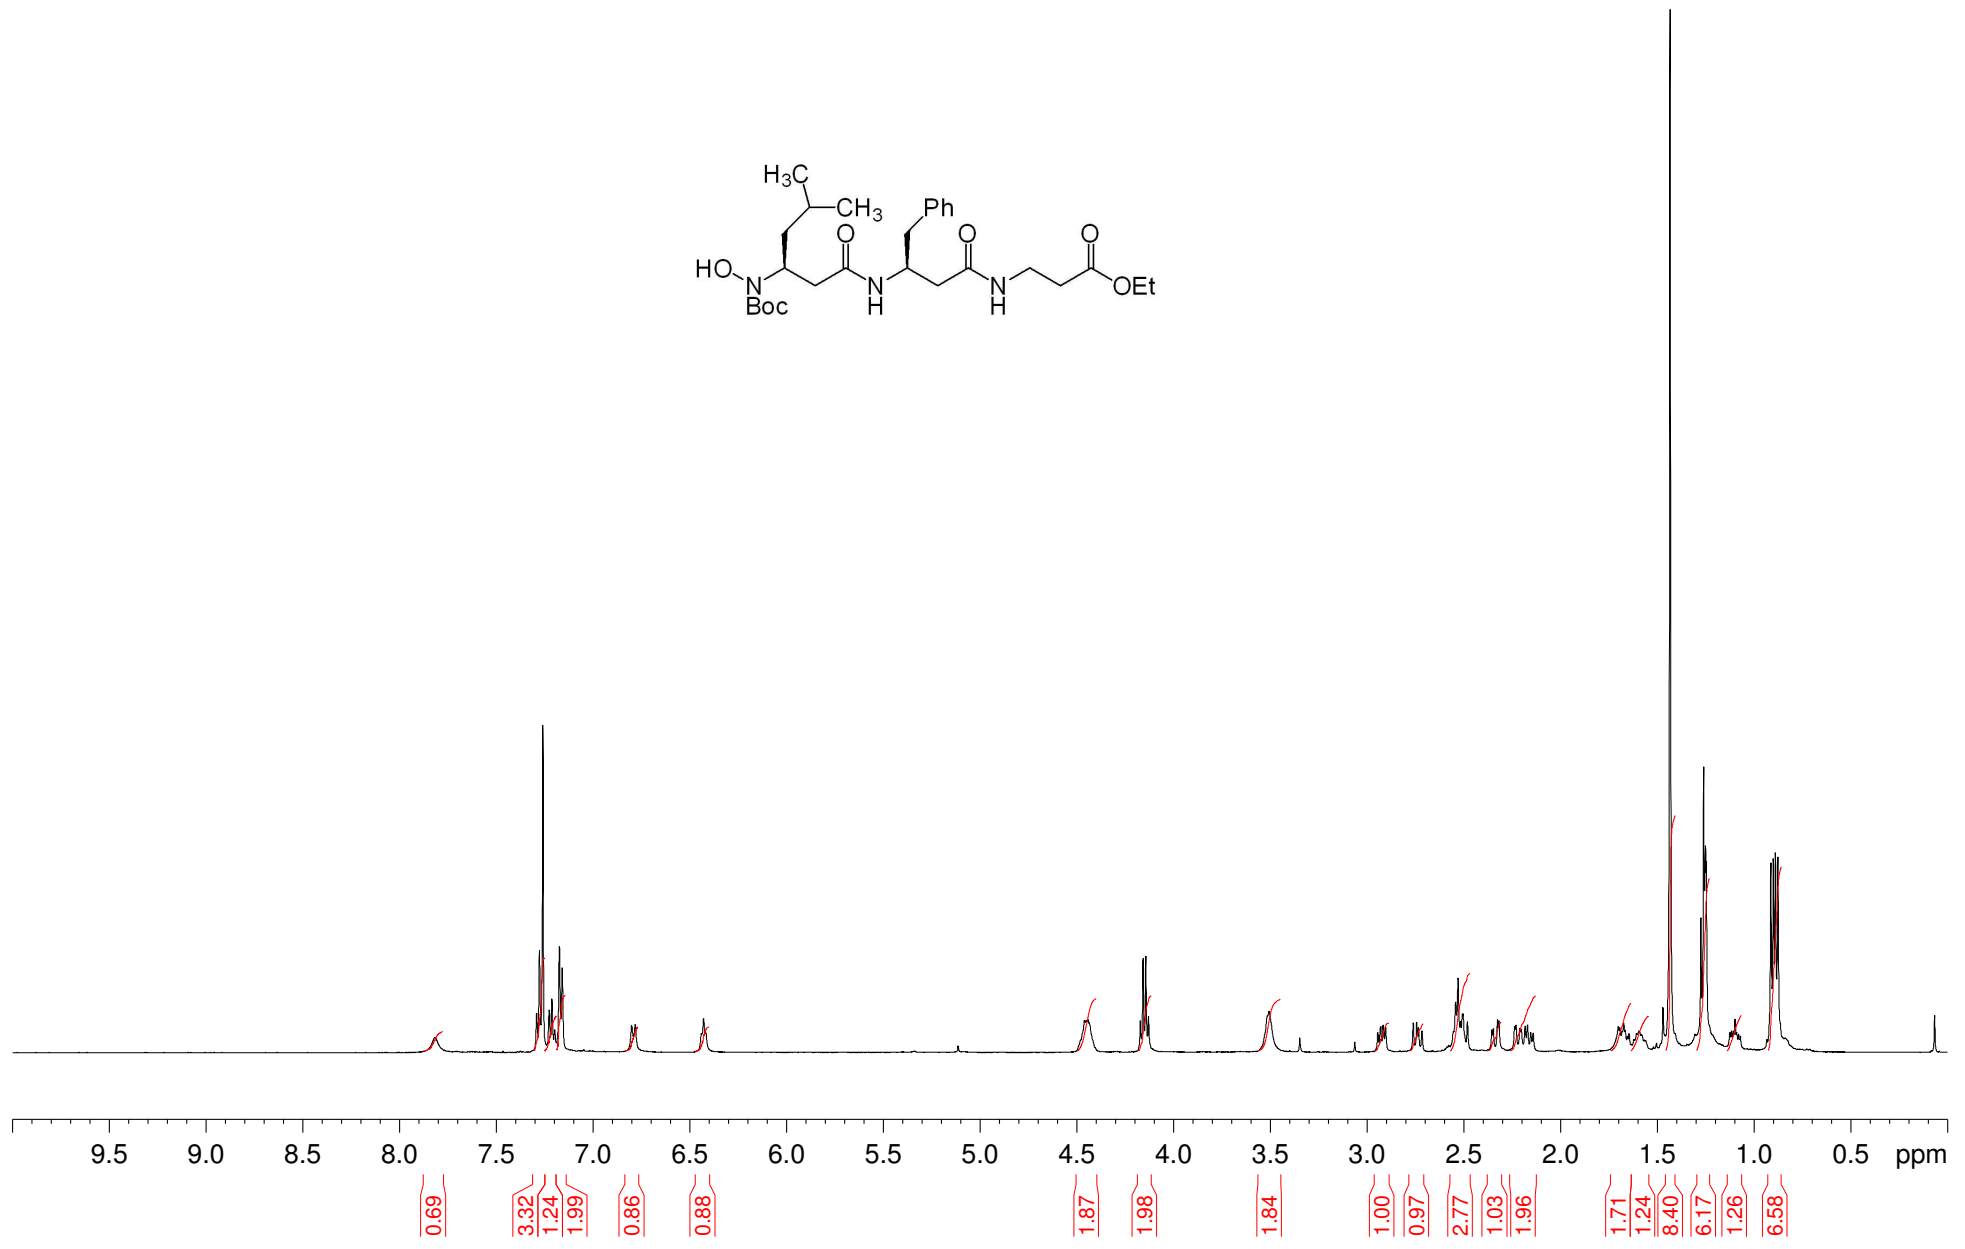

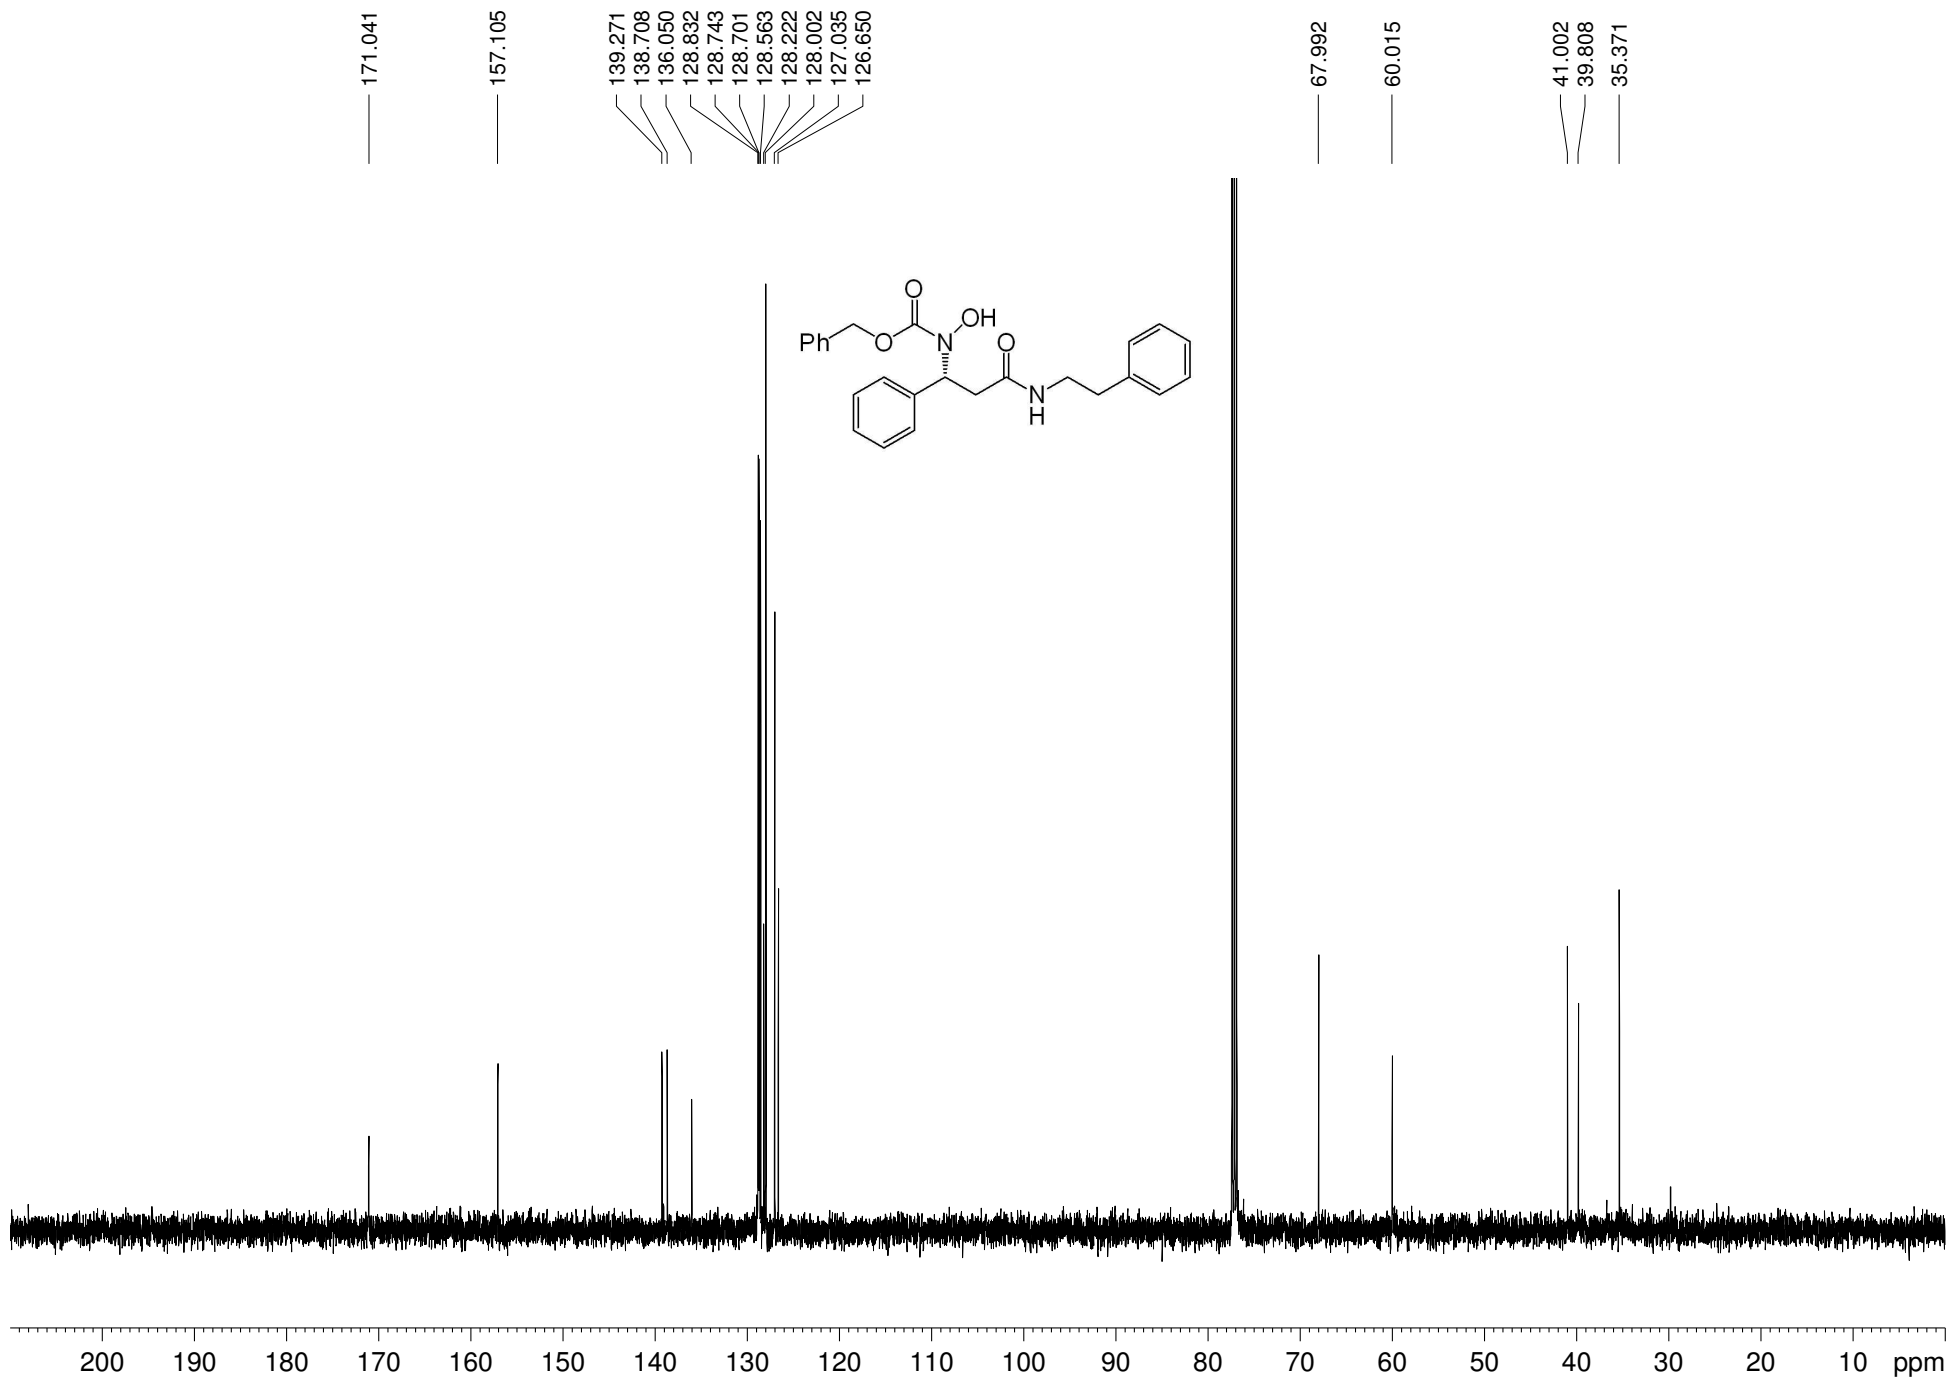

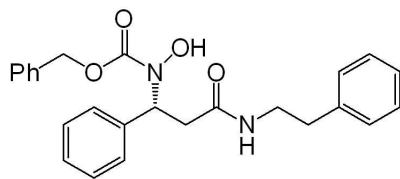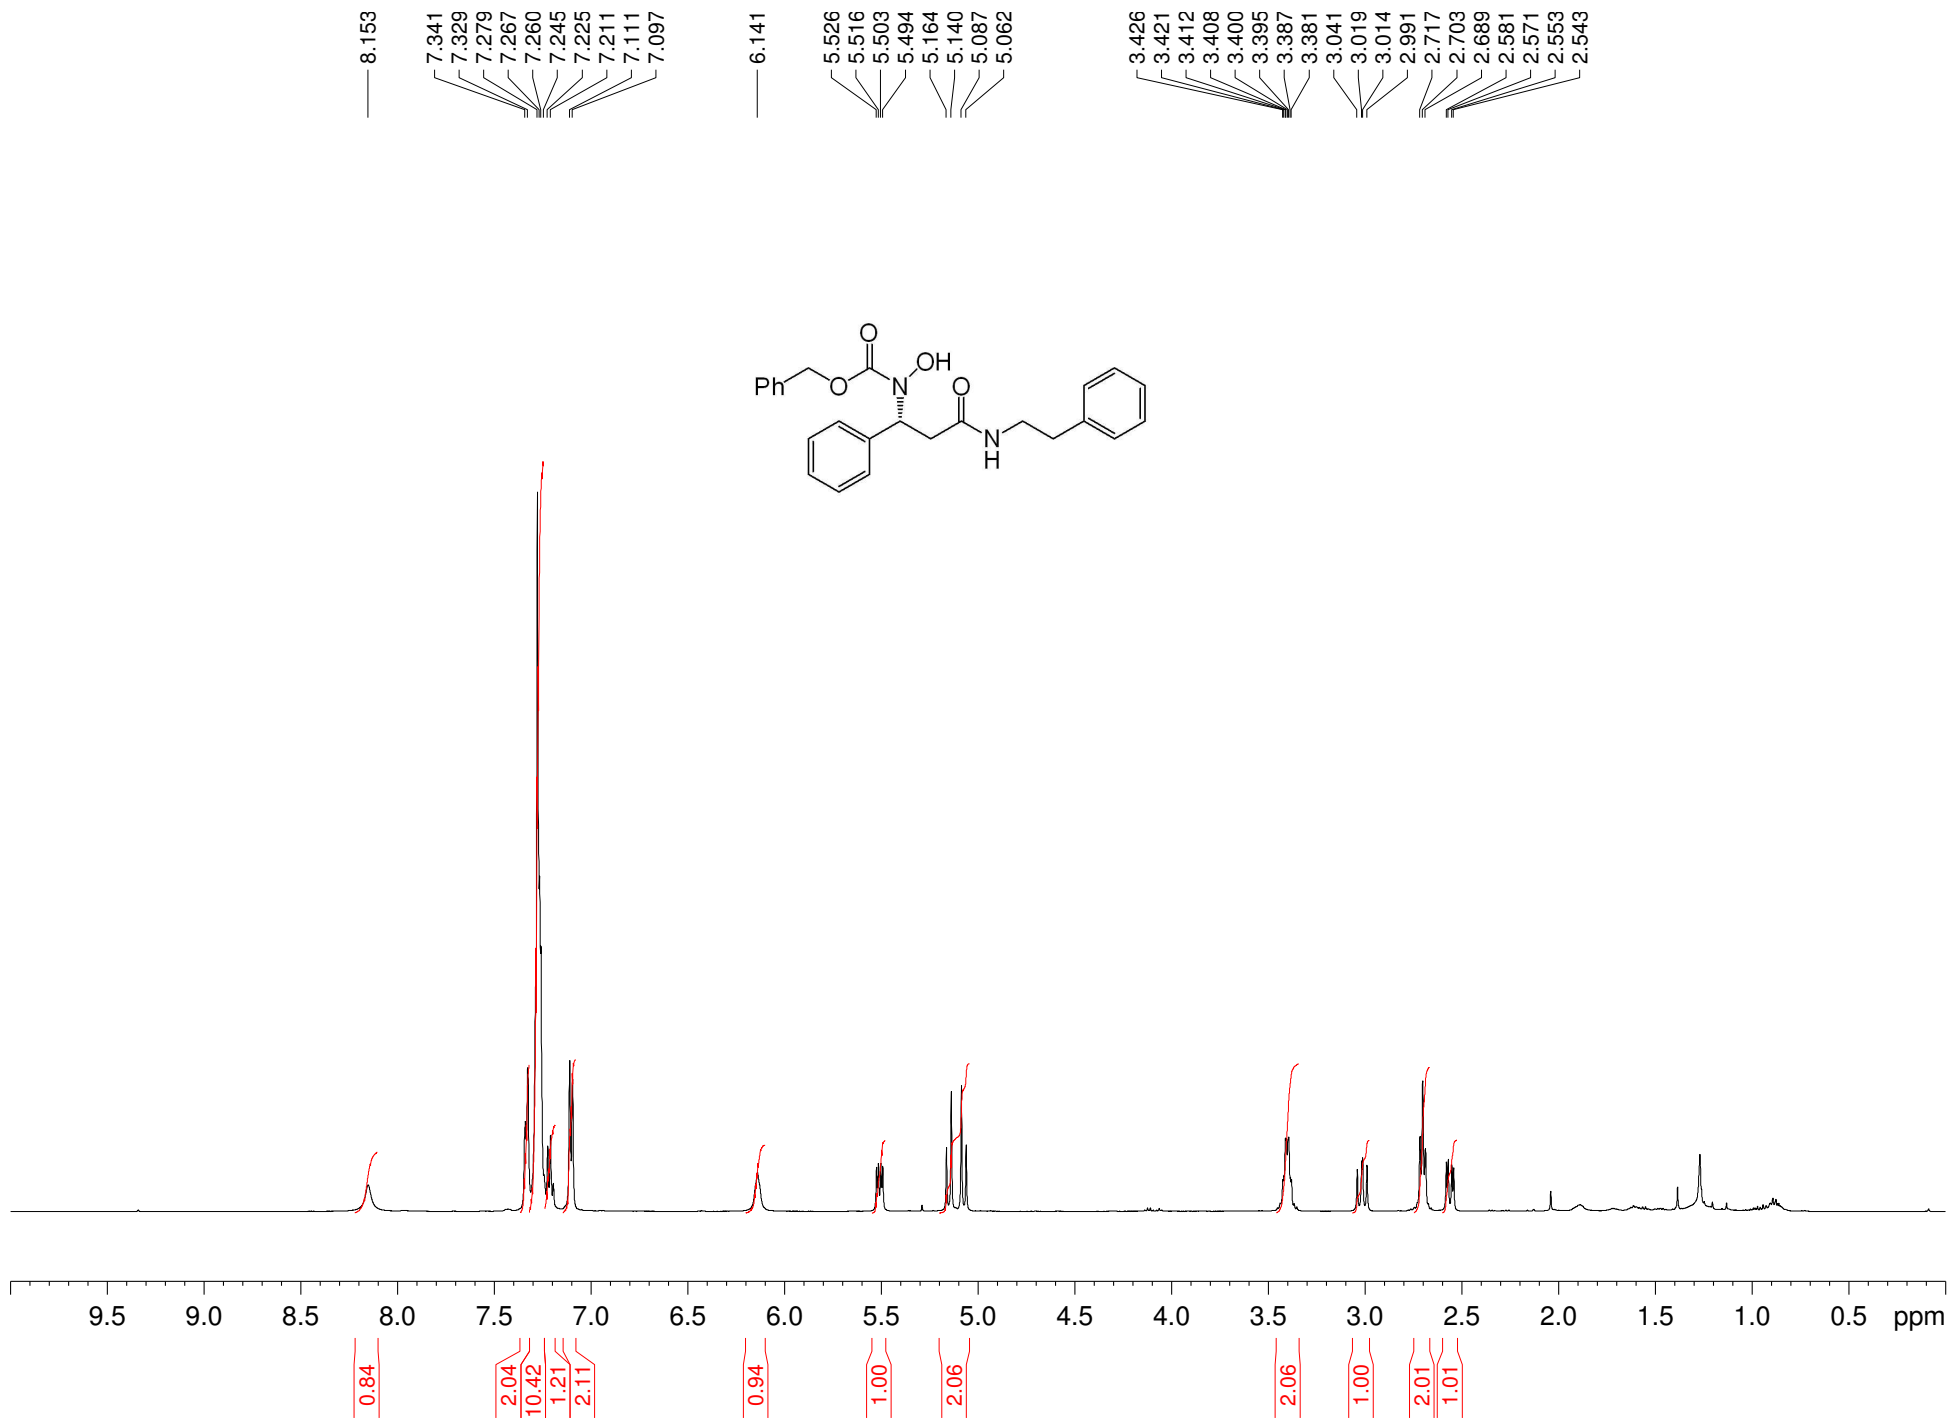

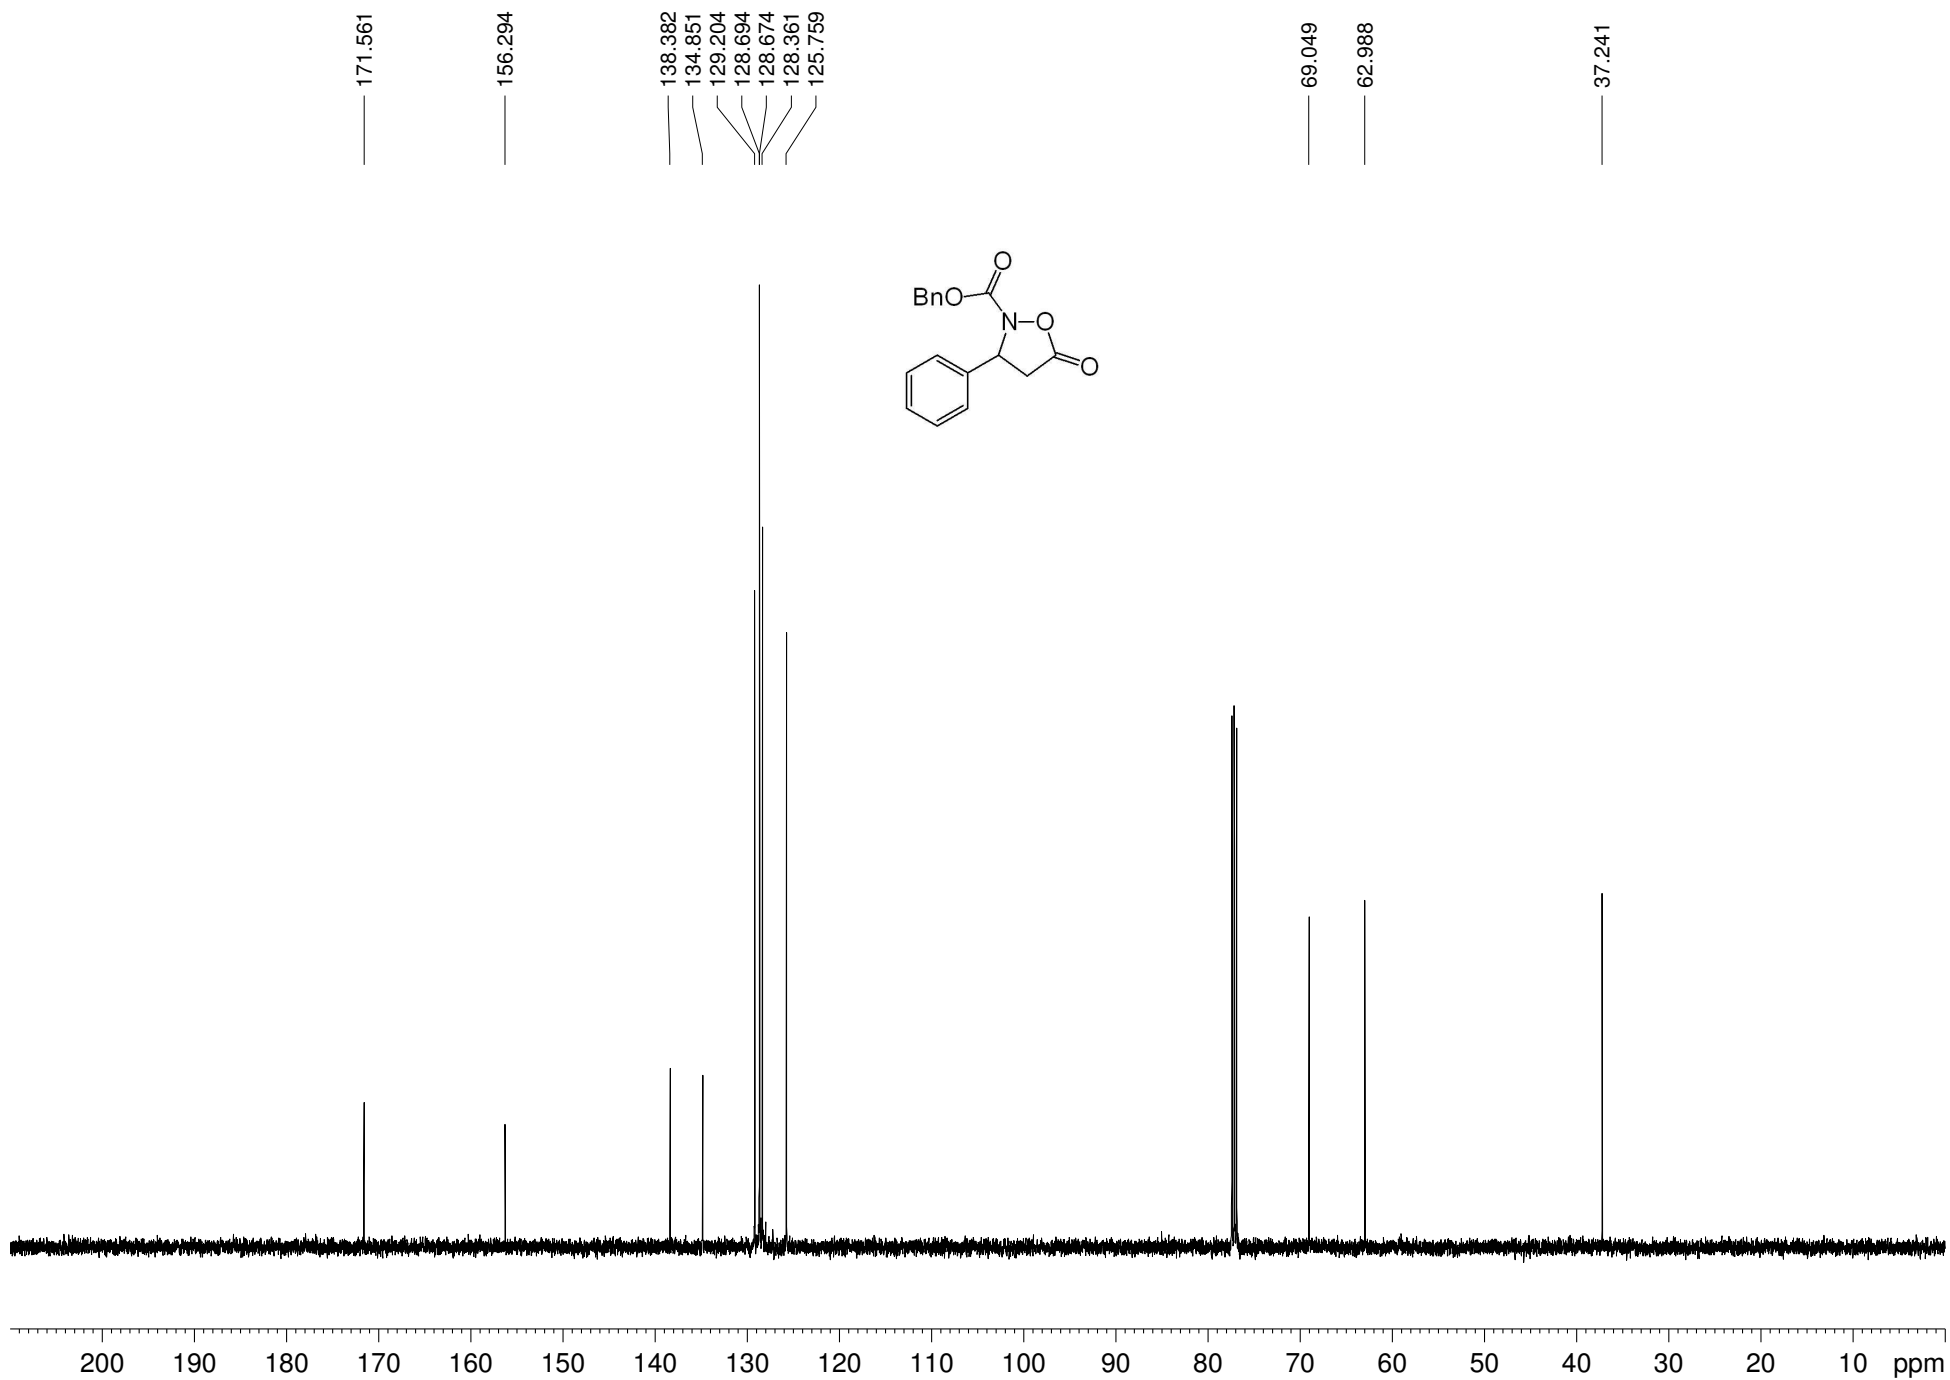

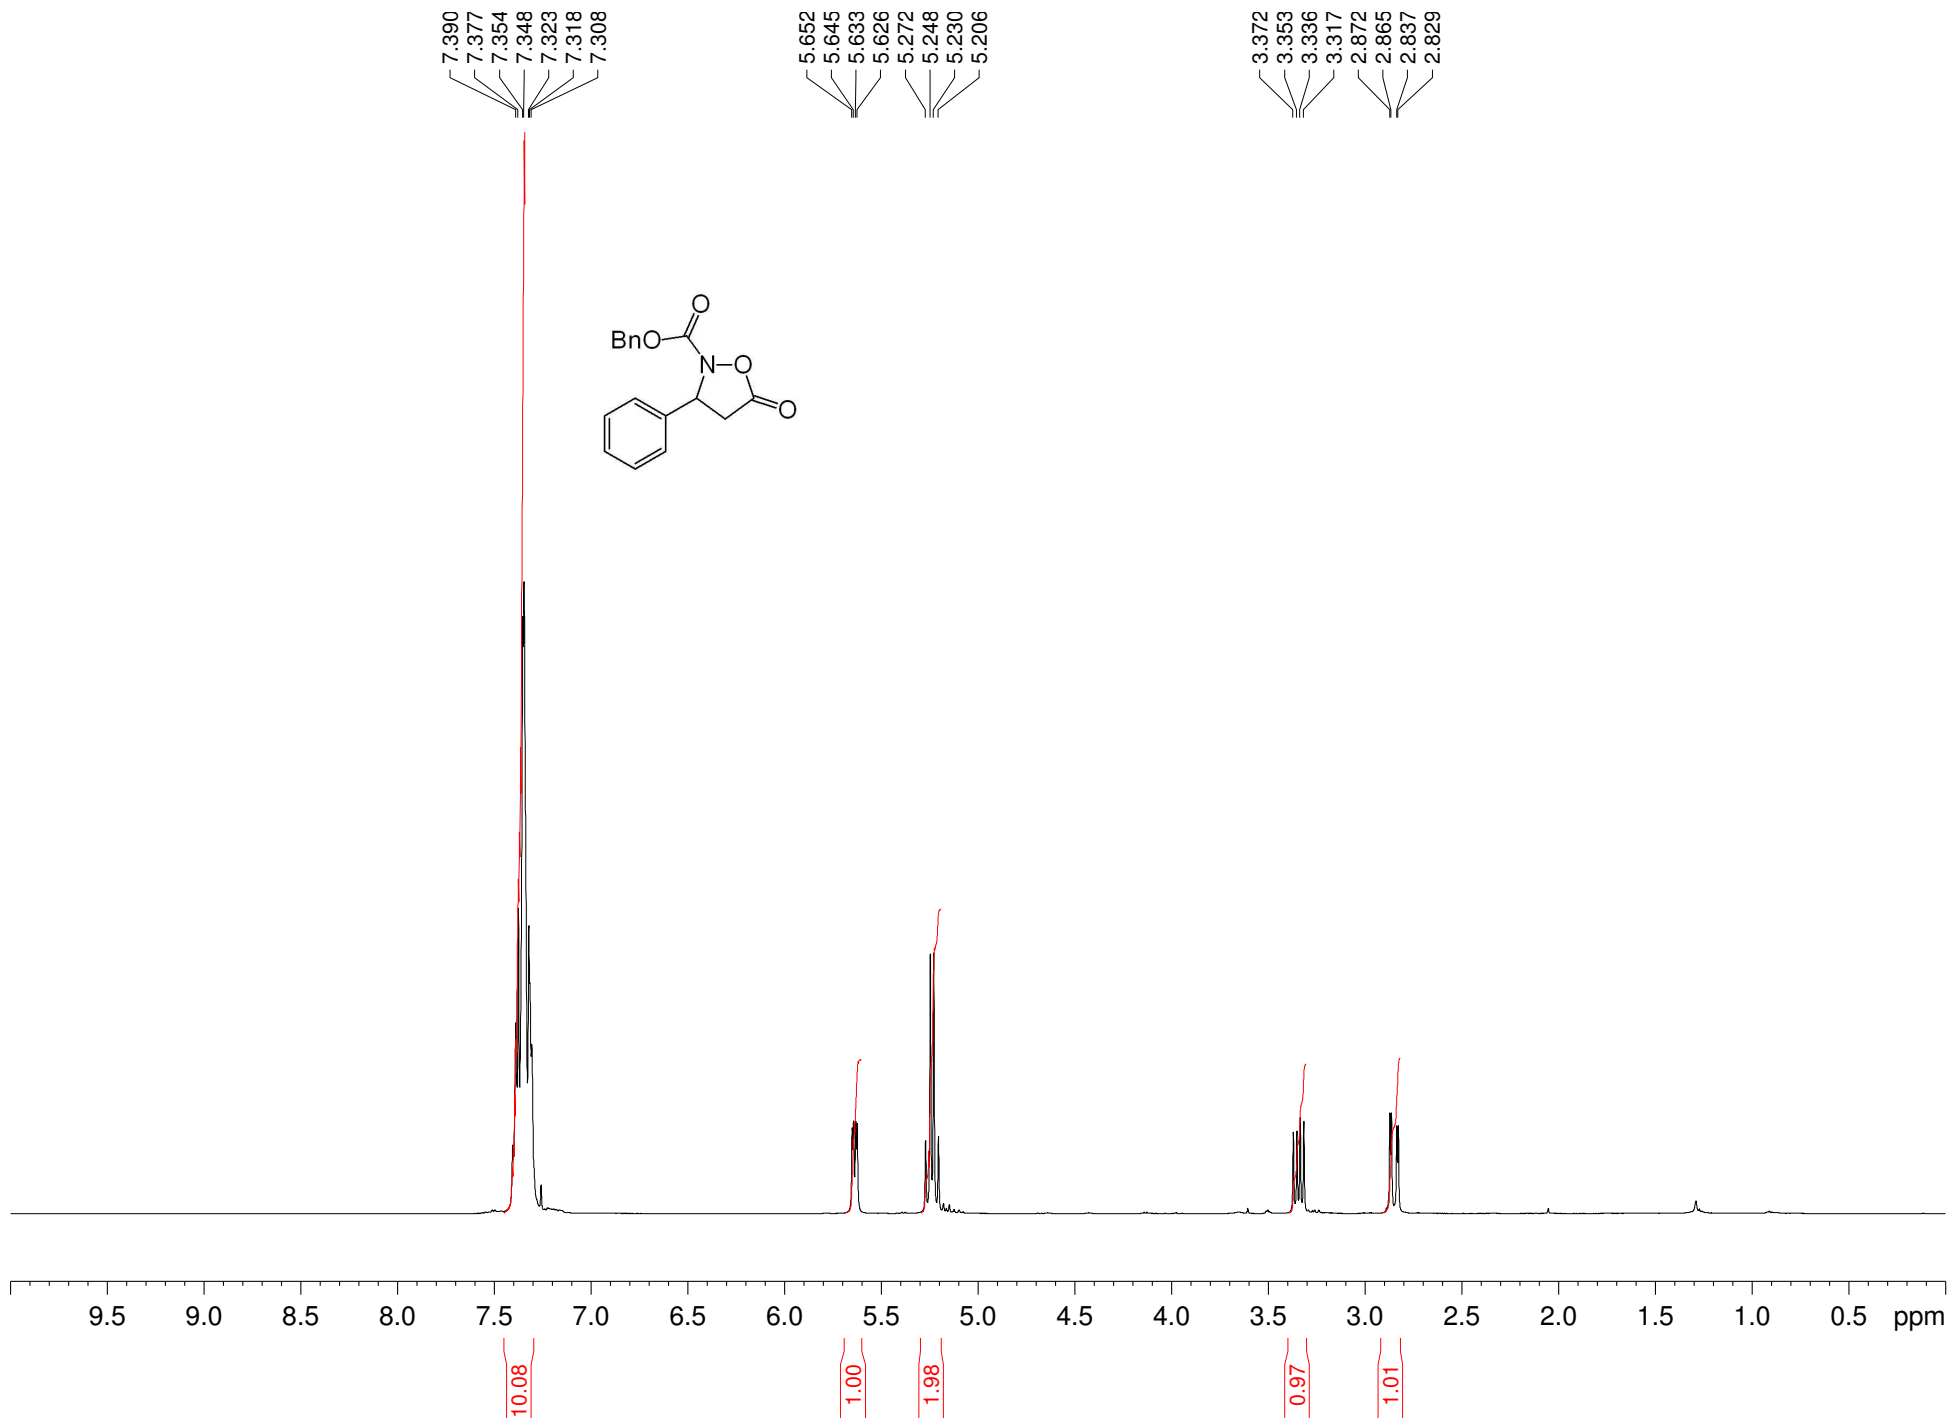





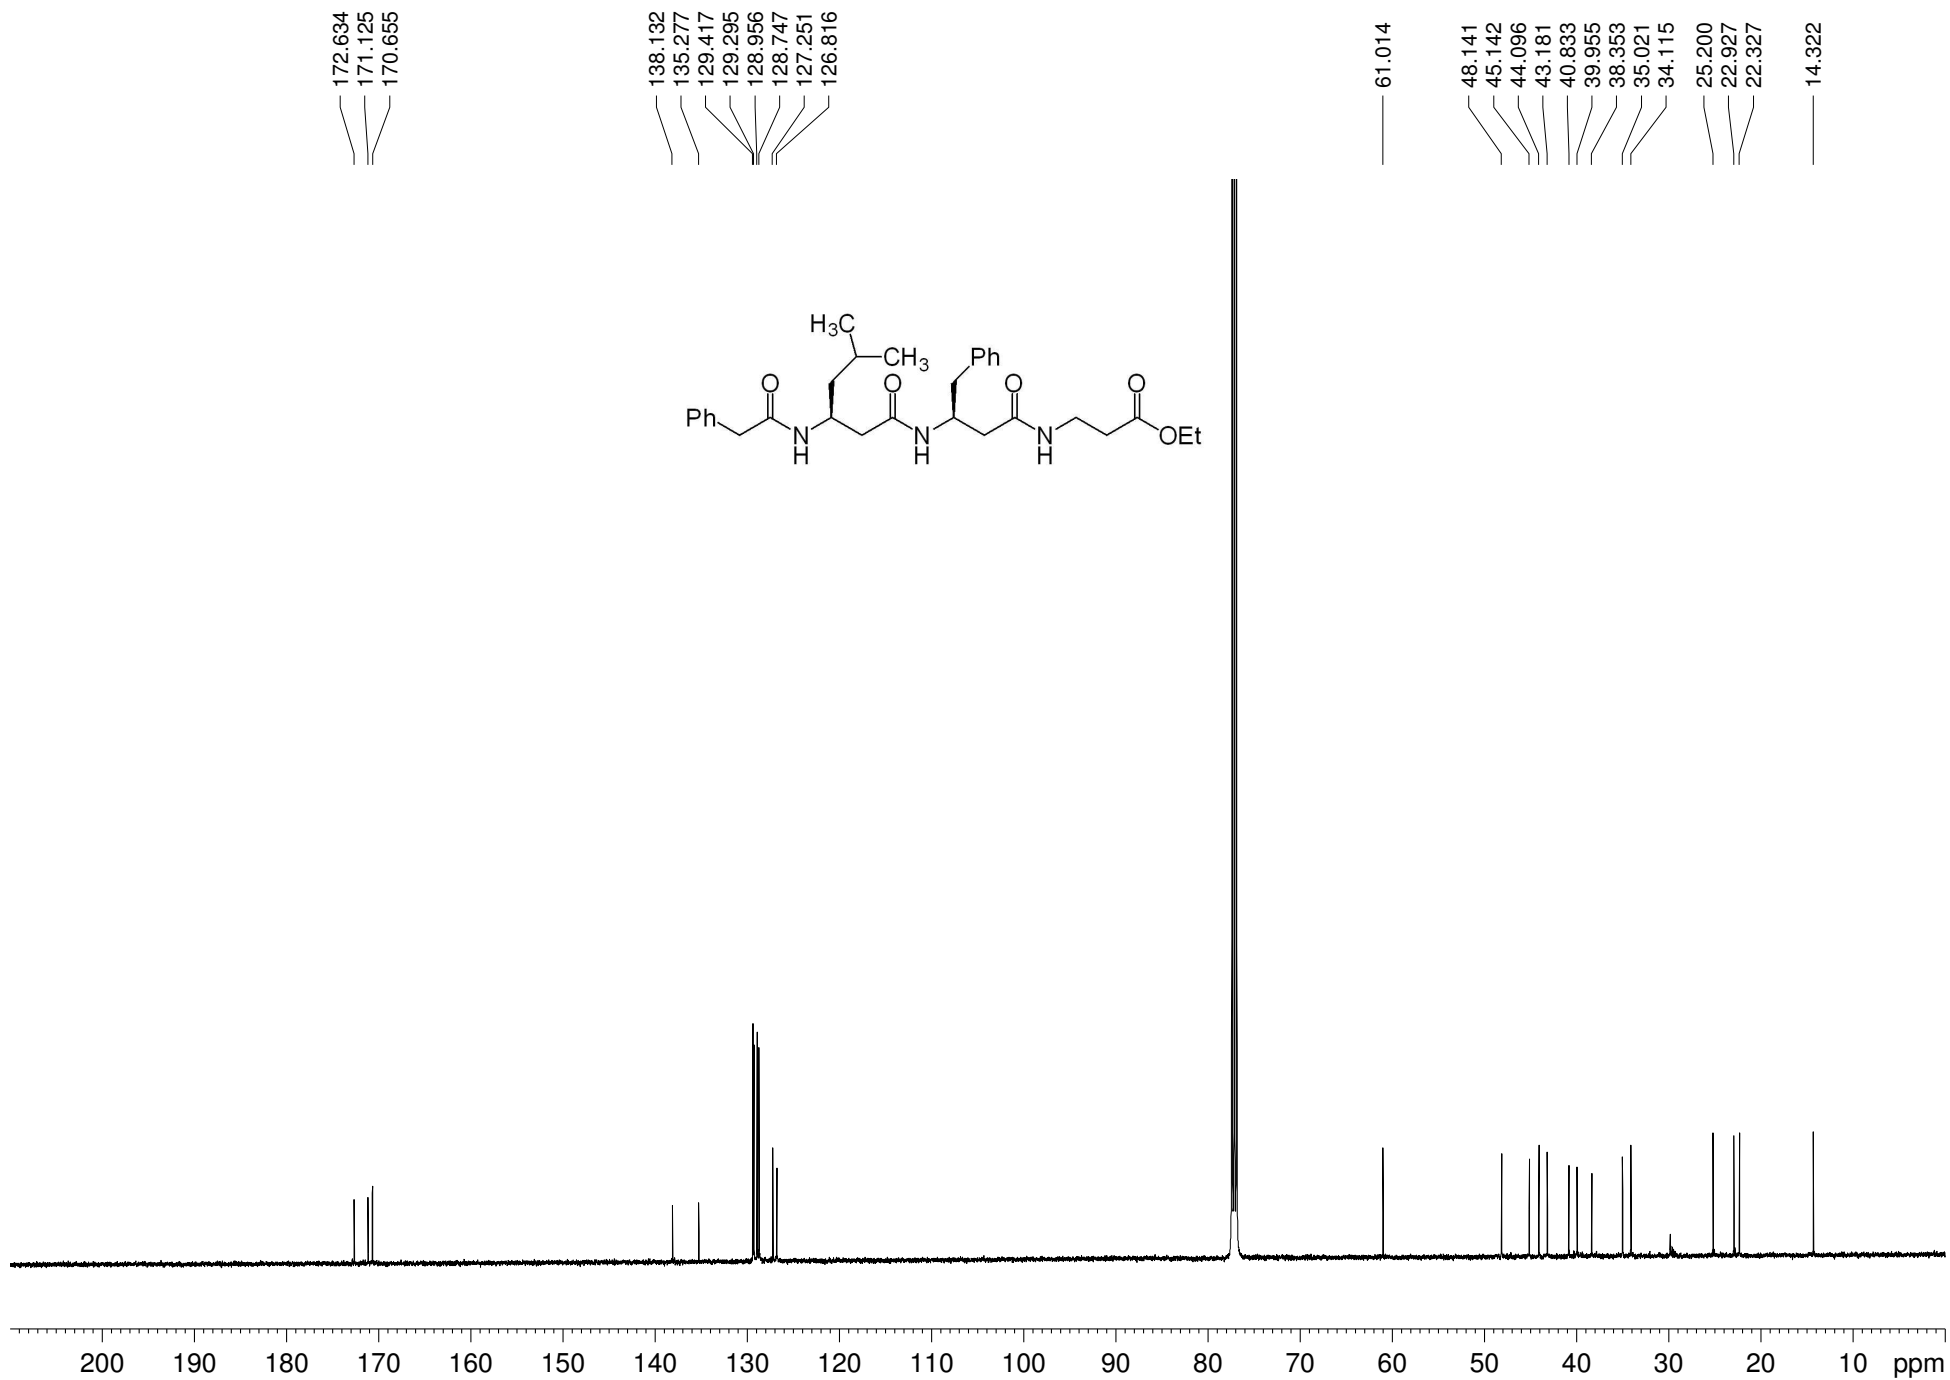

Supplement: NIHMS217911-supplement-Spectra.pdf [file NIHMS217911-supplement-Spectra.pdf]
